# Supplementary material for: Copper-catalyzed aerobic cascade cycloamination and acyloxylation: a direct approach to 4-acyloxy-1H-pyrazoles
Source: Royal Society of Chemistry journal article supplement (doi:10.1039/c5ob00409h), 2015-01-01
Supplement: c5ob00409h1.pdf [file c5ob00409h1.pdf]

# Copper-Catalyzed Aerobic Cascade Cycloamination and Acyloxylation: A Direct Approach to 4-Acyloxy-1*H*-pyrazoles

Zhengwei Ding,<sup>†</sup> Qitao Tan,<sup>†</sup> Mingchun Gao,<sup>†</sup> and Bin Xu<sup>\*,†,‡,§</sup>

<sup>†</sup> Department of Chemistry, Innovative Drug Research Center, Shanghai University,  
Shanghai 200444, China

<sup>‡</sup> State Key Laboratory of Organometallic Chemistry, Shanghai Institute of Organic  
Chemistry, Chinese Academy of Sciences, Shanghai 200032, China

<sup>§</sup> Shanghai Key Laboratory of Green Chemistry and Chemical Processes,  
Department of Chemistry, East China Normal University, Shanghai 200062, China

Tel: (+86) 21-66132830; Fax: (+86) 21-66134594; E-mail: xubin@shu.edu.cn

## Supporting Information

### CONTENTS:

|                                                                                          |     |
|------------------------------------------------------------------------------------------|-----|
| <b>1. General Information</b> .....                                                      | S2  |
| <b>2. Synthesis and Characterization for Hydrazones</b> .....                            | S3  |
| <b>3. Synthesis and Characterization for Pyrazoles</b> .....                             | S9  |
| <b>4. Mechanistic Studies</b> .....                                                      | S17 |
| <b>5. X-Ray Crystal Structure for Compound 3aa</b> .....                                 | S19 |
| <b>6. References</b> .....                                                               | S19 |
| <b>7. Copies of <sup>1</sup>H and <sup>13</sup>C NMR Spectra for All Compounds</b> ..... | S20 |

## 1. General Information

All reagents and metal catalysts were obtained from commercial sources without further purification, and commercially available solvents were purified before use. All new compounds were fully characterized. All melting points were taken on a WRS-1A or a WRS-1B Digital Melting Point Apparatus without correction. Infrared spectra were obtained using an AVATAR 370 FT-IR spectrometer.  $^1\text{H}$  and  $^{13}\text{C}$  NMR spectra were recorded with a Bruker AV-500 spectrometer operating at 500, 125 and 470 MHz, respectively, with chemical shift values being reported in ppm relative to chloroform ( $\delta = 7.26$  ppm), dimethyl sulfoxide ( $\delta = 2.50$  ppm) or TMS ( $\delta = 0.00$  ppm) for  $^1\text{H}$  NMR, and chloroform ( $\delta = 77.16$  ppm) or dimethyl sulfoxide ( $\delta = 39.52$  ppm) for  $^{13}\text{C}$  NMR. Mass spectra and high resolution mass spectra were recorded with an Agilent 5975N using an Electron impact (EI) or Electrospray ionization (ESI) techniques. Silica gel plate GF254 were used for thin layer chromatography (TLC) and silica gel H or 300-400 mesh were used for flash column chromatography. Yields refer to chromatographically and spectroscopically pure compounds, unless otherwise indicated.

## 2. Synthesis and Characterization for Hydrazones

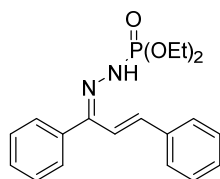

**Diethyl (2-(1,3-diphenylallylidene)hydrazinyl)phosphonate (1a):** A mixture of chalcone (1.04 g, 5.0 mmol) and phosphorohydrazidic acid diethyl ester (1.26 g, 7.5 mmol) in EtOH (20 mL) was stirred overnight at 78 °C. The reaction was cooled to room temperature after complete consumption of chalcone as monitored by TLC analysis. The reaction mixture was evaporated to dry under reduced pressure and the crude product was purified by column chromatography on silica gel (petroleum ether/EtOAc = 2/1) to yield **1a** (1.52 g, 85%) as a colorless solid. M.p. 176-178 °C. IR (KBr): 3151, 2978, 2870, 1617, 1544, 1442, 1326, 1235, 1110, 1036, 972, 762 cm<sup>-1</sup>; <sup>1</sup>H NMR (DMSO-*d*<sub>6</sub>, 500 MHz):  $\delta$  = 9.35 (d, <sup>2</sup>*J*<sub>P-H</sub> = 26.8 Hz, 1H), 7.69-7.65 (m, 3H), 7.45-7.37 (m, 7H), 7.33 (t, *J* = 7.2 Hz, 1H), 6.69 (d, *J* = 16.2 Hz, 1H), 4.10-4.01 (m, 4H), 1.25 (t, *J* = 7.0 Hz, 6H); <sup>13</sup>C NMR (DMSO-*d*<sub>6</sub>, 125 MHz):  $\delta$  = 149.7 (d, <sup>3</sup>*J*<sub>P-C</sub> = 18.8 Hz), 137.9, 137.5, 136.0, 129.0, 128.7, 128.6, 128.5, 128.3, 127.7, 117.9, 62.3 (d, <sup>2</sup>*J*<sub>P-C</sub> = 6.3 Hz), 16.1 (d, <sup>3</sup>*J*<sub>P-C</sub> = 6.3 Hz); MS (EI) *m/z*: 358 (6) [M<sup>+</sup>], 206 (100); HRMS (ESI) *m/z*: Calcd for C<sub>19</sub>H<sub>24</sub>N<sub>2</sub>O<sub>3</sub>P [M+H]<sup>+</sup>: 359.1519, found: 359.1521.

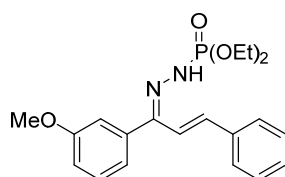

**Diethyl (2-(1-(3-methoxyphenyl)-3-phenylallylidene)hydrazinyl)phosphonate (1b):** Following the same procedure used for **1a** with 1-(3-methoxyphenyl)-3-phenylprop-2-en-1-one (1.19 g, 5.0 mmol) and phosphorohydrazidic acid diethyl ester (1.26 g, 7.5 mmol) in EtOH (20 mL). The crude product was purified by column chromatography on silica gel (petroleum ether/EtOAc = 1/1) to yield **1b** (1.44 g, 74%) as a colorless solid. M.p. 136-138 °C. IR (KBr): 3446, 3166, 2983, 1600, 1464, 1437, 1236, 1030, 978, 888, 767 cm<sup>-1</sup>; <sup>1</sup>H NMR (DMSO-*d*<sub>6</sub>, 500 MHz):  $\delta$  = 9.35 (d, <sup>2</sup>*J*<sub>P-H</sub> = 26.9 Hz, 1H), 7.69 (d, *J* = 7.6 Hz, 2H), 7.64 (d, *J* = 16.2 Hz, 1H), 7.40-7.32 (m, 4H), 7.04-6.98 (m, 3H), 6.72 (d, *J* = 16.1 Hz, 1H), 4.11-4.02 (m, 4H), 3.77 (s, 3H), 1.26 (t, *J* = 7.1 Hz, 6H); <sup>13</sup>C NMR (DMSO-*d*<sub>6</sub>, 125 MHz):  $\delta$  = 159.0, 149.4 (d, <sup>3</sup>*J*<sub>P-C</sub> = 17.6 Hz), 138.9, 137.9, 136.0, 129.3, 129.0, 128.6, 127.7, 121.1, 117.8, 114.2, 114.0, 62.4 (d, <sup>2</sup>*J*<sub>P-C</sub> = 5.5 Hz), 55.0, 16.1 (d, <sup>3</sup>*J*<sub>P-C</sub> = 6.3 Hz); MS (EI) *m/z*: 388 (12) [M<sup>+</sup>], 236 (100); HRMS (ESI) *m/z*: Calcd for C<sub>20</sub>H<sub>26</sub>N<sub>2</sub>O<sub>4</sub>P [M+H]<sup>+</sup>: 389.1625, found: 389.1628.

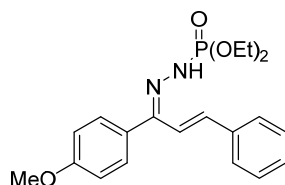

**Diethyl (2-(1-(4-methoxyphenyl)-3-phenylallylidene)hydrazinyl)phosphonate (1c):**

Following the same procedure used for **1a** with 1-(4-methoxyphenyl)-3-phenylprop-2-en-1-one (1.19 g, 5.0 mmol) and phosphorohydrazidic acid diethyl ester (1.26 g, 7.5 mmol) in EtOH (20 mL). The crude product was purified by column chromatography on silica gel (petroleum ether/EtOAc = 1/1) to yield **1c** (1.49 g, 77%) as a colorless solid. M.p. 140-142 °C. IR (KBr): 3445, 3145, 2976, 1607, 1512, 1442, 1302, 1252, 1031, 977, 813, 764  $\text{cm}^{-1}$ ;  $^1\text{H}$  NMR (DMSO- $d_6$ , 500 MHz):  $\delta$  = 9.22 (d,  $^2J_{\text{P-H}}$  = 26.5 Hz, 1H), 7.68 (d,  $J$  = 7.5 Hz, 2H), 7.61 (d,  $J$  = 16.5 Hz, 1H), 7.41-7.32 (m, 5H), 6.99 (d,  $J$  = 8.5 Hz, 2H), 6.71 (d,  $J$  = 16.0 Hz, 1H), 4.10-4.01 (m, 4H), 3.80 (s, 3H), 1.25 (t,  $J$  = 7.0 Hz, 6H);  $^{13}\text{C}$  NMR (DMSO- $d_6$ , 125 MHz):  $\delta$  = 159.5, 149.5 (d,  $^3J_{\text{P-C}}$  = 17.5 Hz), 137.9, 136.1, 129.9, 128.9, 128.6, 127.7, 118.2, 113.6, 62.3 (d,  $^2J_{\text{P-C}}$  = 6.3 Hz), 55.2, 16.1 (d,  $^3J_{\text{P-C}}$  = 6.3 Hz); MS (EI)  $m/z$ : 388 (19) [ $\text{M}^+$ ], 235 (100); HRMS (ESI)  $m/z$ : Calcd for  $\text{C}_{20}\text{H}_{26}\text{N}_2\text{O}_4\text{P}$  [ $\text{M}+\text{H}$ ] $^+$ : 389.1625, found: 389.1619.

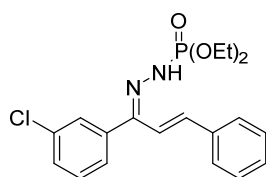**Diethyl (2-(1-(3-chlorophenyl)-3-phenylallylidene)hydrazinyl)phosphonate (1d):**

Following the same procedure used for **1a** with 1-(3-chlorophenyl)-3-phenylprop-2-en-1-one (1.21 g, 5.0 mmol) and phosphorohydrazidic acid diethyl ester (1.26 g, 7.5 mmol) in EtOH (20 mL). The crude product was purified by column chromatography on silica gel (petroleum ether/EtOAc = 2/1) to yield **1d** (1.37 g, 70%) as a colorless solid. M.p. 121-123 °C. IR (KBr): 3442, 3181, 2982, 1443, 1329, 1243, 1127, 1034, 977, 754  $\text{cm}^{-1}$ ;  $^1\text{H}$  NMR (DMSO- $d_6$ , 500 MHz):  $\delta$  = 9.44 (d,  $^2J_{\text{P-H}}$  = 27.0 Hz, 1H), 7.69 (d,  $J$  = 7.5 Hz, 2H), 7.63 (d,  $J$  = 16.2 Hz, 1H), 7.49-7.34 (m, 7H), 6.70 (d,  $J$  = 16.3 Hz, 1H), 4.10-4.01 (m, 4H), 1.25 (t,  $J$  = 7.0 Hz, 6H);  $^{13}\text{C}$  NMR (DMSO- $d_6$ , 125 MHz):  $\delta$  = 148.2 (d,  $^3J_{\text{P-C}}$  = 17.5 Hz), 139.7, 138.0, 135.9, 133.0, 130.2, 129.1, 128.6, 128.4, 128.2, 127.7, 127.4, 117.6, 62.4 (d,  $^2J_{\text{P-C}}$  = 5.0 Hz), 16.0 (d,  $^3J_{\text{P-C}}$  = 6.3 Hz); MS (EI)  $m/z$ : 394 (2) [ $\text{M}^+$  ( $^{37}\text{Cl}$ )], 392 (7) [ $\text{M}^+$  ( $^{35}\text{Cl}$ )], 240 (100); HRMS (ESI)  $m/z$ : Calcd for  $\text{C}_{19}\text{H}_{23}\text{ClN}_2\text{O}_3\text{P}$  [ $\text{M}+\text{H}$ ] $^+$ : 393.1129, found: 393.1133.

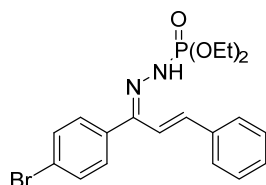**Diethyl (2-(1-(4-bromophenyl)-3-phenylallylidene)hydrazinyl)phosphonate (1e):**

Following the same procedure used for **1a** with 1-(4-bromophenyl)-3-phenylprop-2-en-1-one (1.44 g, 5.0 mmol) and phosphorohydrazidic acid diethyl ester (1.26 g, 7.5 mmol) in EtOH (20 mL). The crude product was purified by column chromatography on silica gel (petroleum ether/EtOAc = 2/1) to yield **1e** (1.55 g, 71%) as a colorless solid. M.p. 140-142 °C. IR (KBr): 3119, 2979, 2873, 1442, 1251, 1070, 1036, 979, 792  $\text{cm}^{-1}$ ;  $^1\text{H}$  NMR (DMSO- $d_6$ , 500 MHz):  $\delta$  = 9.40 (d,  $^2J_{\text{P-H}}$  = 24.5 Hz, 1H), 7.69 (d,  $J$  = 7.5 Hz, 2H), 7.65-7.62 (m, 3H), 7.42-7.32 (m, 5H), 6.70 (d,  $J$  = 16.0 Hz, 1H),

4.10-4.01 (m, 4H), 1.25 (t,  $J = 7.0$  Hz, 6H);  $^{13}\text{C}$  NMR (DMSO- $d_6$ , 125 MHz):  $\delta = 148.6$  (d,  $^3J_{\text{P-C}} = 17.5$  Hz), 138.0, 136.7, 135.9, 131.2, 130.7, 129.1, 128.6, 127.7, 121.8, 117.6, 62.4 (d,  $^2J_{\text{P-C}} = 6.3$  Hz), 16.1 (d,  $^3J_{\text{P-C}} = 6.3$  Hz); MS (EI)  $m/z$ : 438 (5) [ $\text{M}^+$  ( $^{81}\text{Br}$ )], 436 (6) [ $\text{M}^+$  ( $^{79}\text{Br}$ )], 284 (100); HRMS (ESI)  $m/z$ : Calcd for  $\text{C}_{19}\text{H}_{23}\text{BrN}_2\text{O}_3\text{P}$  [ $\text{M}+\text{H}$ ] $^+$ : 437.0624, found: 437.0624.

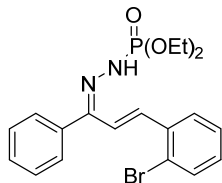

**Diethyl (2-(3-(2-bromophenyl)-1-phenylallylidene)hydrazinyl)phosphonate (1f):**

Following the same procedure used for **1a** with 3-(2-bromophenyl)-1-phenylprop-2-en-1-one (1.44 g, 5.0 mmol) and phosphorohydrazidic acid diethyl ester (1.26 g, 7.5 mmol) in EtOH (20 mL). The crude product was purified by column chromatography on silica gel (petroleum ether/EtOAc = 2/1) to yield **1f** (1.75 g, 80%) as a colorless solid. M.p. 192-194 °C. IR (KBr): 3157, 2981, 2863, 1469, 1437, 1234, 1163, 1110, 1039, 973, 766  $\text{cm}^{-1}$ ;  $^1\text{H}$  NMR (DMSO- $d_6$ , 500 MHz):  $\delta = 9.45$  (d,  $^2J_{\text{P-H}} = 27.0$  Hz, 1H), 8.16-8.14 (m, 1H), 7.65-7.27 (m, 9H), 7.01 (d,  $J = 16.0$  Hz, 1H), 4.11-4.02 (m, 4H), 1.26 (t,  $J = 7.3$  Hz, 6H);  $^{13}\text{C}$  NMR (DMSO- $d_6$ , 125 MHz):  $\delta = 149.3$  (d,  $^3J_{\text{P-C}} = 18.8$  Hz), 137.2, 135.8, 135.4, 132.9, 130.7, 128.7, 128.2, 128.1, 127.9, 124.0, 120.7, 62.4 (d,  $^2J_{\text{P-C}} = 5.0$  Hz), 16.1 (d,  $^3J_{\text{P-C}} = 6.3$  Hz); MS (EI)  $m/z$ : 438 (5) [ $\text{M}^+$  ( $^{81}\text{Br}$ )], 436 (6) [ $\text{M}^+$  ( $^{79}\text{Br}$ )], 286 (100); HRMS (ESI)  $m/z$ : Calcd for  $\text{C}_{19}\text{H}_{23}\text{BrN}_2\text{O}_3\text{P}$  [ $\text{M}+\text{H}$ ] $^+$ : 437.0624, found: 437.0619.

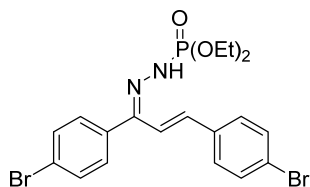

**Diethyl (2-(1,3-bis(4-bromophenyl)allylidene)hydrazinyl)phosphonate (1g):**

Following the same procedure used for **1a** with 1,3-bis(4-bromophenyl)prop-2-en-1-one (1.83 g, 5.0 mmol) and phosphorohydrazidic acid diethyl ester (1.26 g, 7.5 mmol) in EtOH (20 mL). The crude product was purified by column chromatography on silica gel (petroleum ether/EtOAc = 2/1) to yield **1g** (1.88 g, 73%) as a colorless solid. M.p. 167-169 °C. IR (KBr): 3128, 2976, 2900, 1587, 1486, 1436, 1391, 1245, 1072, 1034, 1007, 977, 815, 788  $\text{cm}^{-1}$ ;  $^1\text{H}$  NMR (DMSO- $d_6$ , 500 MHz):  $\delta = 9.42$  (d,  $^2J_{\text{P-H}} = 26.8$  Hz, 1H), 7.66-7.57 (m, 7H), 7.40 (d,  $J = 8.5$  Hz, 2H), 6.68 (d,  $J = 16.2$  Hz, 1H), 4.09-4.01 (m, 4H), 1.24 (t,  $J = 7.1$  Hz, 6H);  $^{13}\text{C}$  NMR (DMSO- $d_6$ , 125 MHz):  $\delta = 148.3$  (d,  $^3J_{\text{P-C}} = 17.5$  Hz), 136.6, 136.5, 135.3, 131.5, 131.2, 130.7, 129.6, 122.2, 121.9, 118.3, 62.4 (d,  $^2J_{\text{P-C}} = 5.0$  Hz), 16.1 (d,  $^3J_{\text{P-C}} = 6.3$  Hz); MS (EI)  $m/z$ : 518 (1) [ $\text{M}^+$  ( $^{81}\text{Br}$ ,  $^{79}\text{Br}$ )], 516 (2) [ $\text{M}^+$  ( $2 \times ^{79}\text{Br}$ )], 408 (54), 406 (100), 404 (53); HRMS (ESI)  $m/z$ : Calcd for  $\text{C}_{19}\text{H}_{22}\text{Br}_2\text{N}_2\text{O}_3\text{P}$  [ $\text{M}+\text{H}$ ] $^+$ : 514.9729, found: 514.9709.

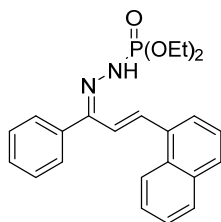

**Diethyl (2-(3-(naphthalen-1-yl)-1-phenylallylidene)hydrazinyl)phosphonate (1h):**

Following the same procedure used for **1a** with 3-(naphthalen-1-yl)-1-phenylprop-2-en-1-one (1.29 g, 5.0 mmol) and phosphorohydrazidic acid diethyl ester (1.26 g, 7.5 mmol) in EtOH (20 mL). The crude product was purified by column chromatography on silica gel (petroleum ether/EtOAc = 2/1) to yield **1h** (1.55 g, 76%) as a colorless solid. M.p. 173-175 °C. IR (KBr): 3444, 3143, 2980, 1444, 1390, 1229, 1168, 1115, 1038, 966, 773  $\text{cm}^{-1}$ ;  $^1\text{H}$  NMR (DMSO- $d_6$ , 500 MHz):  $\delta$  = 9.43 (d,  $^2J_{\text{P-H}}$  = 26.5 Hz, 1H), 8.21 (d,  $J$  = 7.0 Hz, 1H), 7.97-7.83 (m, 3H), 7.70 (d,  $J$  = 16.0 Hz, 1H), 7.62-7.47 (m, 9H), 4.12-4.03 (m, 4H), 1.27 (t,  $J$  = 7.3 Hz, 6H);  $^{13}\text{C}$  NMR (DMSO- $d_6$ , 125 MHz):  $\delta$  = 150.1 (d,  $^3J_{\text{P-C}}$  = 17.5 Hz), 137.7, 134.3, 133.3, 132.7, 130.7, 129.2, 128.7, 128.6, 128.5, 128.3, 126.8, 126.0, 125.6, 124.7, 122.6, 120.5, 62.4 (d,  $^2J_{\text{P-C}}$  = 6.3 Hz), 16.1 (d,  $^3J_{\text{P-C}}$  = 6.3 Hz); MS (EI)  $m/z$ : 408 (6) [ $\text{M}^+$ ], 256 (100); HRMS (ESI)  $m/z$ : Calcd for  $\text{C}_{23}\text{H}_{26}\text{N}_2\text{O}_3\text{P}$  [ $\text{M}+\text{H}$ ] $^+$ : 409.1676, found: 409.1673.

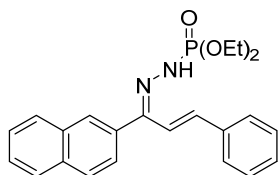

**Diethyl (2-(1-(naphthalen-2-yl)-3-phenylallylidene)hydrazinyl)phosphonate (1i):**

Following the same procedure used for **1a** with 1-(naphthalen-2-yl)-3-phenylprop-2-en-1-one (1.29 g, 5.0 mmol) and phosphorohydrazidic acid diethyl ester (1.26 g, 7.5 mmol) in EtOH (20 mL). The crude product was purified by column chromatography on silica gel (petroleum ether/EtOAc = 2/1) to yield **1i** (1.72 g, 84%) as a colorless solid. M.p. 144-146 °C. IR (KBr): 3142, 2978, 2866, 1624, 1545, 1438, 1236, 1100, 1037, 974, 815, 764  $\text{cm}^{-1}$ ;  $^1\text{H}$  NMR (DMSO- $d_6$ , 500 MHz):  $\delta$  = 9.41 (d,  $^2J_{\text{P-H}}$  = 26.8 Hz, 1H), 7.99-7.94 (m, 4H), 7.75-7.69 (m, 3H), 7.65 (d,  $J$  = 8.5 Hz, 1H), 7.55-7.53 (m, 2H), 7.39 (t,  $J$  = 7.4 Hz, 2H), 7.34 (t,  $J$  = 7.1 Hz, 1H), 6.79 (d,  $J$  = 16.2 Hz, 1H), 4.13-4.05 (m, 4H), 1.28 (t,  $J$  = 7.0 Hz, 6H);  $^{13}\text{C}$  NMR (DMSO- $d_6$ , 125 MHz):  $\delta$  = 149.6 (d,  $^3J_{\text{P-C}}$  = 18.8 Hz), 138.2, 136.1, 135.0, 132.9, 132.6, 129.0, 128.6, 128.3, 127.9, 127.7, 127.6, 127.5, 126.5, 126.4, 126.3, 118.1, 62.4 (d,  $^2J_{\text{P-C}}$  = 5.0 Hz), 16.1 (d,  $^3J_{\text{P-C}}$  = 6.3 Hz). MS (EI)  $m/z$ : 408 (7) [ $\text{M}^+$ ], 271 (14), 255 (100); HRMS (ESI)  $m/z$ : Calcd for  $\text{C}_{23}\text{H}_{26}\text{N}_2\text{O}_3\text{P}$  [ $\text{M}+\text{H}$ ] $^+$ : 409.1676, found: 409.1673.

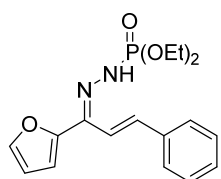

**Diethyl (2-(1-(furan-2-yl)-3-phenylallylidene)hydrazinyl)phosphonate (1j):** Following the same procedure used for **1a** with 1-(furan-2-yl)-3-phenylprop-2-en-1-one (0.99 g, 5.0 mmol) and phosphorohydrazidic acid diethyl ester (1.26 g, 7.5 mmol) in EtOH (20 mL). The crude product was purified by column chromatography on silica gel (petroleum ether/EtOAc = 1/1) to yield **1j** (1.36 g, 78%) as a colorless solid. M.p. 137-139 °C. IR (KBr): 3160, 2985, 1621, 1540, 1495, 1436, 1394, 1318, 1235, 1037, 972, 763 cm<sup>-1</sup>; <sup>1</sup>H NMR (DMSO-*d*<sub>6</sub>, 500 MHz): δ = 9.35 (d, <sup>2</sup>J<sub>P-H</sub> = 26.8 Hz, 1H), 7.77-7.71 (m, 3H), 7.48 (d, *J* = 16.2 Hz, 1H), 7.41 (t, *J* = 7.4 Hz, 2H), 7.35 (t, *J* = 7.2 Hz, 1H), 7.07 (d, *J* = 16.2 Hz, 1H), 6.65 (d, *J* = 3.4 Hz, 1H), 6.59-6.58 (m, 1H), 4.11-4.01 (m, 4H), 1.26 (t, *J* = 7.1 Hz, 6H); <sup>13</sup>C NMR (DMSO-*d*<sub>6</sub>, 125 MHz): δ = 150.6, 143.4, 140.5 (d, <sup>3</sup>J<sub>P-C</sub> = 18.8 Hz), 137.4, 136.0, 129.1, 128.6, 127.7, 116.6, 111.3, 110.4, 62.5 (d, <sup>2</sup>J<sub>P-C</sub> = 5.0 Hz), 16.0 (d, <sup>3</sup>J<sub>P-C</sub> = 6.3 Hz); MS (EI) *m/z*: 348 (8) [M<sup>+</sup>], 196 (100), 195 (90), 152 (30); HRMS (ESI) *m/z*: Calcd for C<sub>17</sub>H<sub>22</sub>N<sub>2</sub>O<sub>4</sub>P [M+H]<sup>+</sup>: 349.1312, found: 349.1313.

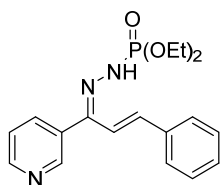

**Diethyl (2-(3-phenyl-1-(pyridin-3-yl)allylidene)hydrazinyl)phosphonate (1k):** Following the same procedure used for **1a** with 3-phenyl-1-(pyridin-3-yl)prop-2-en-1-one (1.05 g, 5.0 mmol) and phosphorohydrazidic acid diethyl ester (1.26 g, 7.5 mmol) in EtOH (20 mL). The crude product was purified by column chromatography on silica gel (petroleum ether/EtOAc = 1/2) to yield **1k** (1.28 g, 71%) as a colorless solid. M.p. 195-197 °C. IR (KBr): 3184, 2979, 1712, 1621, 1581, 1442, 1328, 1242, 1040, 974, 804, 752 cm<sup>-1</sup>; <sup>1</sup>H NMR (DMSO-*d*<sub>6</sub>, 500 MHz): δ = 9.53 (d, <sup>2</sup>J<sub>P-H</sub> = 26.9 Hz, 1H), 8.64-8.61 (m, 2H), 7.84 (d, *J* = 7.9 Hz, 1H), 7.72-7.69 (m, 3H), 7.47 (dd, *J* = 7.8 Hz, 4.8 Hz, 1H), 7.39 (t, *J* = 7.3 Hz, 2H), 7.34 (t, *J* = 7.2 Hz, 1H), 6.71 (d, *J* = 16.2 Hz, 1H), 4.11-4.02 (m, 4H), 1.25 (t, *J* = 7.1 Hz, 6H); <sup>13</sup>C NMR (DMSO-*d*<sub>6</sub>, 125 MHz): δ = 149.4, 149.3, 147.2 (d, <sup>3</sup>J<sub>P-C</sub> = 18.8 Hz), 138.0, 136.2, 135.9, 133.3, 129.1, 128.6, 127.8, 123.4, 117.6, 62.4 (d, <sup>2</sup>J<sub>P-C</sub> = 5.0 Hz), 16.1 (d, <sup>3</sup>J<sub>P-C</sub> = 6.3 Hz); MS (EI) *m/z*: 359 (3) [M<sup>+</sup>], 222 (14), 207 (100); HRMS (ESI) *m/z*: Calcd for C<sub>18</sub>H<sub>23</sub>N<sub>3</sub>O<sub>3</sub>P [M+H]<sup>+</sup>: 360.1472, found: 360.1481.

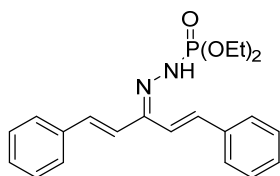

**Diethyl (2-(1,5-diphenylpenta-1,4-dien-3-ylidene)hydrazinyl)phosphonate (1l):** Following the same procedure used for **1a** with 1,5-diphenylpenta-1,4-dien-3-one (1.17 g, 5.0 mmol) and phosphorohydrazidic acid diethyl ester (1.26 g, 7.5 mmol) in EtOH (20 mL). The crude product was purified by column chromatography on silica gel (petroleum ether/EtOAc = 2/1) to yield **1l** (1.65 g, 86%) as a colorless solid. M.p. 112-114 °C. IR (KBr): 3166, 3022, 2979, 1625, 1540, 1492, 1440, 1333, 1236, 1093,

1032, 980, 801, 754  $\text{cm}^{-1}$ ;  $^1\text{H}$  NMR (DMSO- $d_6$ , 500 MHz):  $\delta$  = 9.20 (d,  $^2J_{\text{P-H}} = 27.0$  Hz, 1H), 7.76 (d,  $J = 7.4$  Hz, 2H), 7.62 (d,  $J = 7.4$  Hz, 2H), 7.44-7.35 (m, 6H), 7.29 (t,  $J = 7.3$  Hz, 1H), 7.17 (d,  $J = 16.4$  Hz, 1H), 7.12 (d,  $J = 16.1$  Hz, 1H), 7.03 (d,  $J = 16.1$  Hz, 1H), 4.12-4.02 (m, 4H), 1.27 (t,  $J = 7.1$  Hz, 6H);  $^{13}\text{C}$  NMR (DMSO- $d_6$ , 125 MHz):  $\delta$  = 147.0 (d,  $^3J_{\text{P-C}} = 18.8$  Hz), 136.5, 136.3, 132.1, 128.8, 128.7, 128.6, 128.1, 127.6, 126.9, 125.1, 117.5, 62.4 (d,  $^2J_{\text{P-C}} = 5.0$  Hz), 16.1 (d,  $^3J_{\text{P-C}} = 6.3$  Hz); MS (EI)  $m/z$ : 384 (5) [ $\text{M}^+$ ], 233 (33), 230 (100), 103 (25), 91 (20); HRMS (ESI)  $m/z$ : Calcd for  $\text{C}_{21}\text{H}_{26}\text{N}_2\text{O}_3\text{P}$  [ $\text{M}+\text{H}$ ] $^+$ : 385.1676, found: 385.1672.

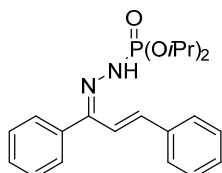

**Diisopropyl (2-(1,3-diphenylallylidene)hydrazinyl)phosphonate (1a')**: Following the same procedure used for **1a** with chalcone (1.04 g, 5.0 mmol) and phosphorohydrazidic acid diisopropyl ester (1.47 g, 7.5 mmol) in EtOH (20 mL). The crude product was purified by column chromatography on silica gel (petroleum ether/EtOAc = 2/1) to yield **1a'** (1.58 g, 82%) as a colorless solid. M.p. 172-174  $^{\circ}\text{C}$ . IR (KBr): 3176, 2979, 1617, 1443, 1380, 1236, 1113, 1011, 763  $\text{cm}^{-1}$ ;  $^1\text{H}$  NMR (DMSO- $d_6$ , 500 MHz):  $\delta$  = 9.27 (d,  $^2J_{\text{P-H}} = 26.7$  Hz, 1H), 7.69-7.65 (m, 3H), 7.45-7.33 (m, 8H), 6.67 (d,  $J = 16.1$  Hz, 1H), 4.61-4.53 (m, 2H), 1.27 (d,  $J = 6.2$  Hz, 6H), 1.24 (d,  $J = 6.2$  Hz, 6H);  $^{13}\text{C}$  NMR (DMSO- $d_6$ , 125 MHz):  $\delta$  = 149.3 (d,  $^3J_{\text{P-C}} = 18.8$  Hz), 137.8, 137.7, 136.0, 129.0, 128.6, 128.5, 128.4, 128.2, 127.6, 118.0, 70.6 (d,  $^2J_{\text{P-C}} = 5.0$  Hz), 23.6 (d,  $^3J_{\text{P-C}} = 5.0$  Hz), 23.4 (d,  $^3J_{\text{P-C}} = 5.0$  Hz); MS (EI)  $m/z$ : 386 (7) [ $\text{M}^+$ ], 206 (100); HRMS (ESI)  $m/z$ : Calcd for  $\text{C}_{21}\text{H}_{28}\text{N}_2\text{O}_3\text{P}$  [ $\text{M}+\text{H}$ ] $^+$ : 387.1832, found: 387.1830.

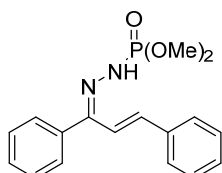

**Dimethyl (2-(1,3-diphenylallylidene)hydrazinyl)phosphonate (1a'')**: Following the same procedure used for **1a** with chalcone (1.04 g, 5.0 mmol) and phosphorohydrazidic acid dimethyl ester (1.05 g, 7.5 mmol) in EtOH (20 mL). The crude product was purified by column chromatography on silica gel (petroleum ether/EtOAc = 2/1) to yield **1a''** (1.42 g, 86%) as a colorless solid. M.p. 175-177  $^{\circ}\text{C}$ . IR (KBr): 3154, 3016, 1621, 1442, 1328, 1245, 1039, 970, 847, 795  $\text{cm}^{-1}$ ;  $^1\text{H}$  NMR (DMSO- $d_6$ , 500 MHz):  $\delta$  = 9.41 (d,  $^2J_{\text{P-H}} = 26.8$  Hz, 1H), 7.69-7.64 (m, 3H), 7.47-7.42 (m, 5H), 7.39 (t,  $J = 7.3$  Hz, 2H), 7.34 (t,  $J = 7.2$  Hz, 1H), 6.70 (d,  $J = 16.1$  Hz, 1H), 3.70 (d,  $^3J_{\text{P-H}} = 11.2$  Hz, 6H);  $^{13}\text{C}$  NMR (DMSO- $d_6$ , 125 MHz):  $\delta$  = 150.2 (d,  $^3J_{\text{P-C}} = 17.5$  Hz), 138.1, 137.4, 136.0, 129.0, 128.7, 128.6, 128.5, 128.2, 127.7, 117.9, 53.3 (d,  $^2J_{\text{P-C}} = 5.0$  Hz); MS (EI)  $m/z$ : 330 (15) [ $\text{M}^+$ ], 206 (100); HRMS (ESI)  $m/z$ : Calcd for  $\text{C}_{17}\text{H}_{20}\text{N}_2\text{O}_3\text{P}$  [ $\text{M}+\text{H}$ ] $^+$ : 331.1206, found: 331.1198.



### 3. Synthesis and Characterization for Pyrazoles

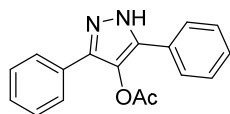

**3,5-Diphenyl-1H-pyrazol-4-yl acetate (3aa)**<sup>[1]</sup>: A mixture of compound **1a** (107.5 mg, 0.3 mmol), CuCl<sub>2</sub> (4.0 mg, 0.03 mmol), HOAc (21.6 mg, 0.36 mmol), K<sub>2</sub>CO<sub>3</sub> (49.8 mg, 0.36 mmol) and H<sub>2</sub>O (50  $\mu$ L) in DMSO (1.5 mL) was stirred at 50 °C for 5 h under oxygen atmosphere. The reaction was cooled to room temperature after complete consumption of **1a** as monitored by TLC analysis. Upon completion, the reaction was diluted by EtOAc (10 mL) and H<sub>2</sub>O (30 mL). The aqueous layer was extracted with EtOAc (3 $\times$ 10 mL) and the combined organic layer was dried over Na<sub>2</sub>SO<sub>4</sub>, then filtered and concentrated in vacuo. The given residue was purified by column chromatography on silica gel (petroleum ether/EtOAc = 7/1) to give **3aa** (57.6 mg, 69%) as a white solid. M.p. 188-190 °C. IR (KBr): 3422, 3227, 1761, 1492, 1448, 1370, 1197, 1145, 955, 760, 693 cm<sup>-1</sup>; <sup>1</sup>H NMR (CDCl<sub>3</sub>, 500 MHz):  $\delta$  = 9.19 (br, NH), 7.60-7.59 (m, 4H), 7.36-7.32 (m, 6H), 2.28 (s, 3H); <sup>13</sup>C NMR (CDCl<sub>3</sub>, 125 MHz):  $\delta$  = 169.2, 139.6, 129.7, 129.0, 128.9, 128.6, 126.4, 20.9; MS (EI) m/z: 278 (10) [M<sup>+</sup>], 237 (18), 236 (100).

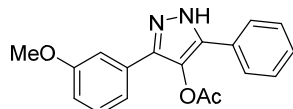

**3-(3-Methoxyphenyl)-5-phenyl-1H-pyrazol-4-yl acetate (3ba)**: Following the same procedure used for **3aa** with compound **1b** (116.5 mg, 0.3 mmol), CuCl<sub>2</sub> (4.0 mg, 0.03 mmol), HOAc (21.6 mg, 0.36 mmol), K<sub>2</sub>CO<sub>3</sub> (49.8 mg, 0.36 mmol) and H<sub>2</sub>O (50  $\mu$ L) in DMSO (1.5 mL). After 6 h at 50 °C, purification by column chromatography on silica gel (petroleum ether/EtOAc = 5/1) to yield **3ba** (64.6 mg, 70%) as a yellow oil. IR (KBr): 3321, 2933, 1762, 1709, 1594, 1465, 1368, 1270, 1195, 1036, 971 cm<sup>-1</sup>; <sup>1</sup>H NMR (DMSO-*d*<sub>6</sub>, 500 MHz):  $\delta$  = 7.70 (d, *J* = 7.5 Hz, 2H), 7.48 (t, *J* = 7.5 Hz, 2H), 7.41-7.26 (m, 4H), 6.96 (d, *J* = 6.7 Hz, 1H), 3.81 (s, 3H), 2.36 (s, 3H); <sup>13</sup>C NMR (DMSO-*d*<sub>6</sub>, 125 MHz):  $\delta$  = 169.2, 159.6, 141.6, 130.2, 129.0, 128.8, 128.4, 128.1, 125.5, 125.1, 117.8, 113.9, 110.8, 110.5, 55.1, 20.6; MS (MALDI/DHB) m/z: 309 (100) [M<sup>+</sup>H]; HRMS (MALDI/DHB) m/z: Calcd for C<sub>18</sub>H<sub>17</sub>N<sub>2</sub>O<sub>3</sub> [M+H]<sup>+</sup>: 309.1234, found: 309.1234.

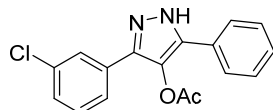

**3-(3-Chlorophenyl)-5-phenyl-1H-pyrazol-4-yl acetate (3ca)**: Following the same procedure used for **3aa** with compound **1c** (117.8 mg, 0.3 mmol), CuCl<sub>2</sub> (4.0 mg, 0.03 mmol), HOAc (21.6 mg, 0.36 mmol), K<sub>2</sub>CO<sub>3</sub> (49.8 mg, 0.36 mmol) and H<sub>2</sub>O (50  $\mu$ L) in DMSO (1.5 mL). After 4 h at 50 °C, purification by column chromatography on silica gel (petroleum ether/EtOAc = 7/1) to yield **3da** (62.8 mg, 67%) as a white solid.

M.p. 163-165 °C. IR (KBr): 3240, 3079, 2924, 1760, 1590, 1371, 1204, 1150, 1006, 961, 890, 764, 692  $\text{cm}^{-1}$ ;  $^1\text{H}$  NMR ( $\text{CDCl}_3$ , 500 MHz):  $\delta$  = 11.00 (br, NH), 7.61 (s, 1H), 7.55 (d,  $J$  = 7.8 Hz, 2H), 7.48 (d,  $J$  = 7.2 Hz, 1H), 7.38-7.33 (m, 3H), 7.29-7.22 (m, 2H), 2.30 (s, 3H);  $^{13}\text{C}$  NMR ( $\text{CDCl}_3$ , 125 MHz):  $\delta$  = 168.9, 139.9, 138.4, 134.8, 131.9, 130.2, 129.1, 128.9, 128.7, 128.6, 126.5, 126.3, 124.5, 20.9; MS (MALDI/DHB)  $m/z$ : 315 (33) [ $\text{M}^+\text{H}$  ( $^{37}\text{Cl}$ )], 313 (100) [ $\text{M}^+\text{H}$  ( $^{35}\text{Cl}$ )]; HRMS (ESI)  $m/z$ : (MALDI/DHB)  $m/z$ : Calcd for  $\text{C}_{17}\text{H}_{14}\text{N}_2\text{O}_2\text{Cl}$  [ $\text{M}+\text{H}$ ] $^+$ : 313.0738, found: 313.0738.

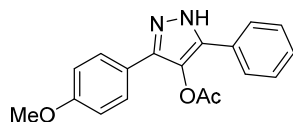

**3-(4-Methoxyphenyl)-5-phenyl-1H-pyrazol-4-yl acetate (3da)**: Following the same procedure used for **3aa** with compound **1d** (116.5 mg, 0.3 mmol),  $\text{CuCl}_2$  (4.0 mg, 0.03 mmol), HOAc (21.6 mg, 0.36 mmol),  $\text{K}_2\text{CO}_3$  (49.8 mg, 0.36 mmol) and  $\text{H}_2\text{O}$  (50  $\mu\text{L}$ ) in DMSO (1.5 mL). After 4 h at 50 °C, purification by column chromatography on silica gel (petroleum ether/EtOAc = 5/1) to yield **3da** (55.5 mg, 60%) as a white solid. M.p. 174-176 °C. IR (KBr): 3228, 2861, 1759, 1615, 1537, 1511, 1368, 1251, 1030, 958, 834, 696  $\text{cm}^{-1}$ ;  $^1\text{H}$  NMR ( $\text{CDCl}_3$ , 500 MHz):  $\delta$  = 11.11 (br, NH), 7.59 (d,  $J$  = 6.6 Hz, 2H), 7.50 (d,  $J$  = 8.8 Hz, 2H), 7.36-7.29 (m, 3H), 6.85 (d,  $J$  = 8.8 Hz, 2H), 3.80 (s, 3H), 2.27 (s, 3H);  $^{13}\text{C}$  NMR ( $\text{CDCl}_3$ , 125 MHz):  $\delta$  = 169.2, 159.9, 139.8, 139.2, 129.8, 128.9, 128.5, 128.4, 127.8, 126.5, 121.9, 114.4, 55.4, 20.9; MS (MALDI/DHB)  $m/z$ : 309 [ $\text{M}^+\text{H}$ ]; HRMS (MALDI/DHB)  $m/z$ : (ESI)  $m/z$ : Calcd for  $\text{C}_{18}\text{H}_{17}\text{N}_2\text{O}_3$  [ $\text{M}+\text{H}$ ] $^+$ : 309.1234, found: 309.1234.

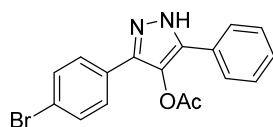

**3-(4-Bromophenyl)-5-phenyl-1H-pyrazol-4-yl acetate (3ea)**: Following the same procedure used for **3aa** with compound **1e** (131.2 mg, 0.3 mmol),  $\text{CuCl}_2$  (4.0 mg, 0.03 mmol), HOAc (21.6 mg, 0.36 mmol),  $\text{K}_2\text{CO}_3$  (49.8 mg, 0.36 mmol) and  $\text{H}_2\text{O}$  (50  $\mu\text{L}$ ) in DMSO (1.5 mL). After 5 h at 50 °C, purification by column chromatography on silica gel (petroleum ether/EtOAc = 7/1) to yield **3ea** (70.7 mg, 66%) as a white solid. M.p. 239-241 °C. IR (KBr): 3220, 1775, 1753, 1491, 1450, 1369, 1193, 1149, 958, 884, 824, 760, 683  $\text{cm}^{-1}$ ;  $^1\text{H}$  NMR ( $\text{DMSO}-d_6$ , 500 MHz):  $\delta$  = 13.59-13.57 (m, NH), 7.73 (d,  $J$  = 8.4 Hz, 1.5H), 7.68 (d,  $J$  = 8.5 Hz, 1.3H), 7.65 (d,  $J$  = 8.2 Hz), 7.60 (d,  $J$  = 8.3 Hz, 0.8H), 7.51 (t,  $J$  = 7.7 Hz, 1.3H), 7.45 (t,  $J$  = 7.6 Hz, 0.8H), 7.41 (t,  $J$  = 7.4 Hz, 0.6H), 7.35 (t,  $J$  = 7.3 Hz, 0.4H), 2.37 (s, 3H);  $^{13}\text{C}$  NMR ( $\text{DMSO}-d_6$ , 125 MHz):  $\delta$  = 169.1, 142.4, 141.3, 133.5, 132.3, 132.2, 131.8, 131.2, 129.2, 128.8, 128.5, 128.3, 127.8, 127.6, 127.5, 127.3, 125.6, 125.4, 121.6, 120.9, 20.6; MS (MALDI/DHB)  $m/z$ : 359 (98) [ $\text{M}^+\text{H}$  ( $^{81}\text{Br}$ )], 357 (100) [ $\text{M}^+\text{H}$  ( $^{79}\text{Br}$ )]; HRMS (MALDI/DHB)  $m/z$ : Calcd for  $\text{C}_{17}\text{H}_{14}\text{N}_2\text{O}_2\text{Br}$  [ $\text{M}+\text{H}$ ] $^+$ : 357.0233, found: 357.0233.

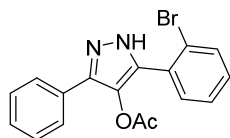

**5-(2-Bromophenyl)-3-phenyl-1H-pyrazol-4-yl acetate (3fa):** Following the same procedure used for **3aa** with compound **1f** (131.2 mg, 0.3 mmol), CuCl<sub>2</sub> (4.0 mg, 0.03 mmol), HOAc (21.6 mg, 0.36 mmol), K<sub>2</sub>CO<sub>3</sub> (49.8 mg, 0.36 mmol) and H<sub>2</sub>O (50 μL) in DMSO (1.5 mL). After 8 h at 50 °C, purification by column chromatography on silica gel (petroleum ether/EtOAc = 7/1) to yield **3fa** (65.6 mg, 61%) as a yellow oil. IR (KBr): 3219, 3070, 2927, 1767, 1607, 1442, 1367, 1251, 1190, 1145, 1019, 883, 760 cm<sup>-1</sup>; <sup>1</sup>H NMR (DMSO-*d*<sub>6</sub>, 500 MHz): δ = 13.59-13.34 (m, NH), 7.74-7.37 (m, 9H), 2.19 (s, 3H); <sup>13</sup>C NMR (DMSO-*d*<sub>6</sub>, 125 MHz): δ = 168.6, 143.5, 133.0, 132.3, 131.8, 129.0, 128.8, 128.3, 127.7, 125.5, 122.6, 20.4; MS (EI) *m/z*: 358 (4) [M<sup>+</sup> (<sup>81</sup>Br)], 356 (5) [M<sup>+</sup> (<sup>79</sup>Br)], 104 (100); HRMS (ESI) *m/z*: Calcd for C<sub>17</sub>H<sub>14</sub>N<sub>2</sub>O<sub>2</sub>Br [M+H]<sup>+</sup>: 357.0233, found: 357.0223.

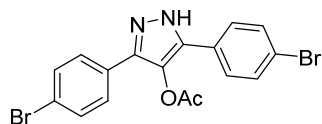

**3,5-bis(4-Bromophenyl)-1H-pyrazol-4-yl acetate (3ga):** Following the same procedure used for **3aa** with compound **1g** (154.9 mg, 0.3 mmol), CuCl<sub>2</sub> (4.0 mg, 0.03 mmol), HOAc (21.6 mg, 0.36 mmol), K<sub>2</sub>CO<sub>3</sub> (49.8 mg, 0.36 mmol) and H<sub>2</sub>O (50 μL) in DMSO (1.5 mL). After 4 h at 50 °C, purification by column chromatography on silica gel (petroleum ether/EtOAc = 7/1) to yield **3ga** (61.5 mg, 47%) as a white solid. M.p. 245-247 °C. IR (KBr): 3220, 1776, 1759, 1702, 1486, 1372, 1197, 1147, 1010, 956, 825, 746 cm<sup>-1</sup>; <sup>1</sup>H NMR (DMSO-*d*<sub>6</sub>, 500 MHz): δ = 13.66 (br, NH), 7.72-7.59 (m, 8H), 2.37 (s, 3H); <sup>13</sup>C NMR (DMSO-*d*<sub>6</sub>, 125 MHz): δ = 169.0, 141.4, 132.2, 131.8, 128.4, 127.6, 127.4, 20.6; MS (MALDI/DHB) *m/z*: 439 (50) [M<sup>+</sup>H (2×<sup>81</sup>Br)], 437 (100) [M<sup>+</sup>H (<sup>81</sup>Br, <sup>79</sup>Br)], 435 (50) [M<sup>+</sup>H (2×<sup>79</sup>Br)]; HRMS (MALDI/DHB) *m/z*: Calcd for C<sub>17</sub>H<sub>13</sub>N<sub>2</sub>O<sub>2</sub>Br<sub>2</sub> [M+H]<sup>+</sup>: 434.9338, found: 434.9338.

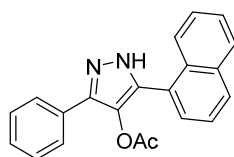

**5-(Naphthalen-1-yl)-3-phenyl-1H-pyrazol-4-yl acetate (3ha):** Following the same procedure used for **3aa** with compound **1h** (122.5 mg, 0.3 mmol), CuCl<sub>2</sub> (4.0 mg, 0.03 mmol), HOAc (21.6 mg, 0.36 mmol), K<sub>2</sub>CO<sub>3</sub> (49.8 mg, 0.36 mmol) and H<sub>2</sub>O (50 μL) in DMSO (1.5 mL). After 4 h at 50 °C, purification by column chromatography on silica gel (petroleum ether/EtOAc = 7/1) to yield **3ha** (62.2 mg, 63%) as a colorless oil. IR (KBr): 3241, 2919, 1764, 1709, 1446, 1367, 1199, 1100, 1010, 988, 776 cm<sup>-1</sup>; <sup>1</sup>H NMR (DMSO-*d*<sub>6</sub>, 500 MHz): δ = 13.75-13.35 (m, NH), 8.32-7.71 (m, 5H), 7.64-7.37 (m, 7H), 2.14-2.01 (m, 3H); <sup>13</sup>C NMR (DMSO-*d*<sub>6</sub>, 125 MHz): δ = 168.8, 133.3, 132.6, 132.2, 131.0, 129.4, 129.2, 128.8, 128.4, 128.2, 127.8, 126.9, 126.4, 126.2, 126.0, 125.7, 125.4, 125.1, 20.3; MS (MALDI/DHB) *m/z*: 329 (100)

[M<sup>+</sup>H], 287 (44); HRMS (MALDI/DHB) m/z: Calcd for C<sub>21</sub>H<sub>17</sub>N<sub>2</sub>O<sub>2</sub> [M+H]<sup>+</sup>: 329.1285, found: 329.1285.

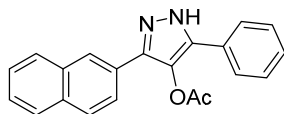

**3-(Naphthalen-2-yl)-5-phenyl-1H-pyrazol-4-yl acetate (3ia):** Following the same procedure used for **3aa** with compound **1i** (122.5 mg, 0.3 mmol), CuCl<sub>2</sub> (4.0 mg, 0.03 mmol), HOAc (21.6 mg, 0.36 mmol), K<sub>2</sub>CO<sub>3</sub> (49.8 mg, 0.36 mmol) and H<sub>2</sub>O (50 μL) in DMSO (1.5 mL). After 4 h at 50 °C, purification by column chromatography on silica gel (petroleum ether/EtOAc = 7/1) to yield **3ia** (63.9 mg, 65%) as a white solid. M.p. 206-208 °C. IR (KBr): 3430, 3244, 3056, 1766, 1636, 1447, 1364, 1192, 1135, 754 cm<sup>-1</sup>; <sup>1</sup>H NMR (DMSO-*d*<sub>6</sub>, 500 MHz): δ = 13.65-13.59 (m, NH), 8.22-7.69 (m, 7H), 7.57-7.36 (m, 5H), 2.43 (s, 3H); <sup>13</sup>C NMR (DMSO-*d*<sub>6</sub>, 125 MHz): δ = 169.3, 142.4, 142.2, 133.5, 133.4, 133.1, 132.4, 132.0, 129.6, 129.2, 128.8, 128.6, 128.5, 128.2, 127.8, 127.6, 127.5, 126.9, 126.8, 126.4, 126.2, 125.6, 125.4, 124.3, 124.1, 123.9, 123.1, 20.6; MS (EI) m/z: 328 (13) [M<sup>+</sup>], 286 (100); HRMS (ESI) m/z: Calcd for C<sub>21</sub>H<sub>17</sub>N<sub>2</sub>O<sub>2</sub> [M+H]<sup>+</sup>: 329.1285, found: 329.1274.

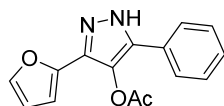

**3-(Furan-2-yl)-5-phenyl-1H-pyrazol-4-yl acetate (3ja):** Following the same procedure used for **3aa** with compound **1j** (104.5 mg, 0.3 mmol), CuCl<sub>2</sub> (4.0 mg, 0.03 mmol), HOAc (21.6 mg, 0.36 mmol), K<sub>2</sub>CO<sub>3</sub> (49.8 mg, 0.36 mmol) and H<sub>2</sub>O (50 μL) in DMSO (1.5 mL). After 6 h at 50 °C, purification by column chromatography on silica gel (petroleum ether/EtOAc = 7/1) to yield **3ja** (44.4 mg, 55%) as a gray solid. M.p. 152-155 °C. IR (KBr): 3221, 2928, 1764, 1710, 1631, 1452, 1368, 1195, 1008, 892, 737 cm<sup>-1</sup>; <sup>1</sup>H NMR (DMSO-*d*<sub>6</sub>, 500 MHz): δ = 7.78 (s, 1H), 7.69 (d, *J* = 7.4 Hz, 2H), 7.48 (t, *J* = 7.7 Hz, 2H), 7.38 (t, *J* = 7.3 Hz, 1H), 6.69 (s, 1H), 6.61 (s, 1H), 2.40 (s, 3H); <sup>13</sup>C NMR (DMSO-*d*<sub>6</sub>, 125 MHz): δ = 169.2, 142.9, 129.3, 129.0, 128.6, 128.3, 127.8, 127.3, 125.5, 111.6, 106.9, 20.5; MS (EI) m/z: 268 (8) [M<sup>+</sup>], 105 (100); HRMS (ESI) m/z: Calcd for C<sub>15</sub>H<sub>13</sub>N<sub>2</sub>O<sub>3</sub> [M+H]<sup>+</sup>: 269.0921, found: 269.0909.

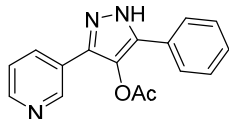

**5-Phenyl-3-(pyridin-3-yl)-1H-pyrazol-4-yl acetate (3ka):** Following the same procedure used for **3aa** with compound **1k** (107.8 mg, 0.3 mmol), CuCl<sub>2</sub> (4.0 mg, 0.03 mmol), HOAc (21.6 mg, 0.36 mmol), K<sub>2</sub>CO<sub>3</sub> (49.8 mg, 0.36 mmol) and H<sub>2</sub>O (50 μL) in DMSO (1.5 mL). After 6 h at 50 °C, purification by column chromatography on silica gel (petroleum ether/EtOAc = 5/1) to yield **3ka** (43.5 mg, 52%) as a white solid. M.p. 153-155 °C. IR (KBr): 3433, 3038, 2817, 1752, 1644, 1380, 1209, 1021, 947, 701 cm<sup>-1</sup>; <sup>1</sup>H NMR (DMSO-*d*<sub>6</sub>, 500 MHz): δ = 13.69 (br, NH), 8.91-7.39 (m, 9H), 2.38 (s, 3H); <sup>13</sup>C NMR (DMSO-*d*<sub>6</sub>, 125 MHz): δ = 169.2, 149.0, 146.4, 132.9, 129.2, 128.7, 125.6, 125.2, 124.9, 124.1, 20.6; MS (EI) m/z: 279 (27) [M<sup>+</sup>], 105 (100);

HRMS (ESI)  $m/z$ : Calcd for  $C_{16}H_{14}N_3O_2$   $[M+H]^+$ : 280.1081, found: 280.1071.

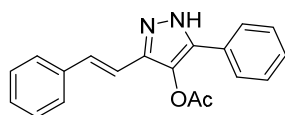

**5-Phenyl-3-styryl-1H-pyrazol-4-yl acetate (3la)**: Following the same procedure used for **3aa** with compound **11** (115.3 mg, 0.3 mmol),  $CuCl_2$  (4.0 mg, 0.03 mmol), HOAc (21.6 mg, 0.36 mmol),  $K_2CO_3$  (49.8 mg, 0.36 mmol) and  $H_2O$  (50  $\mu$ L) in DMSO (1.5 mL). After 8 h at 50  $^\circ$ C, purification by column chromatography on silica gel (petroleum ether/EtOAc = 7/1) to yield **3la** (42.9 mg, 47%) as a red solid. M.p. 138-142  $^\circ$ C. IR (KBr): 3247, 3030, 2925, 1757, 1595, 1446, 1370, 1204, 1016, 952, 751  $cm^{-1}$ ;  $^1H$  NMR (DMSO- $d_6$ , 500 MHz):  $\delta$  = 13.33 (br, NH), 7.69 (d,  $J$  = 7.1 Hz, 2H), 7.60 (d,  $J$  = 7.4 Hz, 2H), 7.46 (t,  $J$  = 7.5 Hz, 2H), 7.40 (m, 3H), 7.30 (t,  $J$  = 7.4 Hz, 1H), 7.16 (d,  $J$  = 16.7 Hz, 1H), 6.98 (d,  $J$  = 16.6 Hz, 1H), 2.42 (s, 3H);  $^{13}C$  NMR (DMSO- $d_6$ , 125 MHz):  $\delta$  = 169.2, 139.2, 136.4, 129.3, 129.2, 129.1, 128.9, 128.8, 128.7, 128.1, 126.5, 126.3, 125.4, 125.1, 20.6; MS (EI)  $m/z$ : 304 (32)  $[M^+]$ , 262 (100); HRMS (ESI)  $m/z$ : Calcd for  $C_{19}H_{17}N_2O_2$   $[M+H]^+$ : 305.1285, found: 305.1279.

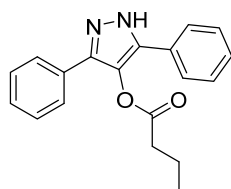

**3,5-Diphenyl-1H-pyrazol-4-yl butyrate (3ab)**: Following the same procedure used for **3aa** with compound **1a** (107.5 mg, 0.3 mmol),  $CuCl_2$  (4.0 mg, 0.03 mmol), *n*-butyric acid (31.7 mg, 0.36 mmol),  $K_2CO_3$  (49.8 mg, 0.36 mmol) and  $H_2O$  (50  $\mu$ L) in DMSO (1.5 mL). After 4 h at 50  $^\circ$ C, purification by column chromatography on silica gel (petroleum ether/EtOAc = 7/1) to yield **3ab** (60.7 mg, 66%) as a pale yellow solid. M.p. 110-113  $^\circ$ C. IR (KBr): 3234, 2961, 1765, 1589, 1459, 1439, 1262, 1148, 957, 767  $cm^{-1}$ ;  $^1H$  NMR (DMSO- $d_6$ , 500 MHz):  $\delta$  = 7.69 (d,  $J$  = 7.3 Hz, 4H), 7.47 (t,  $J$  = 7.7 Hz, 4H), 7.37 (t,  $J$  = 7.4 Hz, 2H), 2.65 (t,  $J$  = 7.2 Hz, 2H), 1.63 (m, 2H), 0.88 (t,  $J$  = 7.4 Hz, 3H);  $^{13}C$  NMR (DMSO- $d_6$ , 125 MHz):  $\delta$  = 171.6, 140.0, 128.9, 128.8, 128.3, 128.1, 125.6, 125.1, 35.2, 17.8, 13.4; MS (MALDI/DHB)  $m/z$ : 307 (100)  $[M+H]^+$ ; HRMS (MALDI/DHB)  $m/z$ : Calcd for  $C_{19}H_{19}N_2O_2$   $[M+H]^+$ : 307.1441, found: 307.1441.

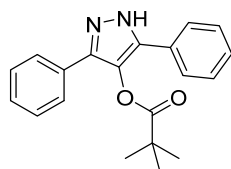

**3,5-Diphenyl-1H-pyrazol-4-yl pivalate (3ac)**: Following the same procedure used for **3aa** with compound **1a** (107.5 mg, 0.3 mmol),  $CuCl_2$  (4.0 mg, 0.03 mmol), pivalic acid (36.8 mg, 0.36 mmol),  $K_2CO_3$  (49.8 mg, 0.36 mmol) and  $H_2O$  (50  $\mu$ L) in DMSO (1.5 mL). After 10 h at 50  $^\circ$ C, purification by column chromatography on silica gel (petroleum ether/EtOAc = 7/1) to yield **3ac** (54.8 mg, 57%) as a white solid. M.p.

213-215 °C; IR (KBr): 3371, 2969, 1753, 1589, 1477, 1256, 1110, 958, 771, 707, 693  $\text{cm}^{-1}$ ;  $^1\text{H}$  NMR ( $\text{CDCl}_3$ , 500 MHz):  $\delta$  = 10.81-10.37 (m, 1H), 7.60 (d,  $J$  = 6.7 Hz), 7.37-7.31 (m, 6H), 1.32 (s, 9H);  $^{13}\text{C}$  NMR ( $\text{CDCl}_3$ , 125 MHz):  $\delta$  = 176.2, 139.8, 129.6, 129.1, 128.8, 128.6, 126.8, 39.0, 27.3; MS (MALDI/DHB)  $m/z$ : 321 (100) [ $\text{M}^+\text{H}$ ]; HRMS (MALDI/DHB)  $m/z$ : Calcd for  $\text{C}_{20}\text{H}_{21}\text{N}_2\text{O}_2$  [ $\text{M}+\text{H}$ ] $^+$ : 321.1598, found: 321.1598.

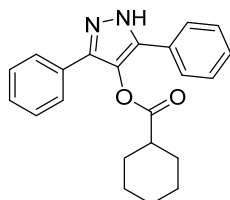

**3,5-Diphenyl-1H-pyrazol-4-yl cyclohexanecarboxylate (3ad):** Following the same procedure used for **3aa** with compound **1a** (107.5 mg, 0.3 mmol),  $\text{CuCl}_2$  (4.0 mg, 0.03 mmol), cyclohexanecarboxylic acid (46.2 mg, 0.36 mmol),  $\text{K}_2\text{CO}_3$  (49.8 mg, 0.36 mmol) and  $\text{H}_2\text{O}$  (50  $\mu\text{L}$ ) in DMSO (1.5 mL). After 3 h at 50 °C, purification by column chromatography on silica gel (petroleum ether/EtOAc = 7/1) to yield **3ad** (61.2 mg, 59%) as a white solid. M.p. 201-203 °C; IR (KBr): 3217, 2929, 2856, 2348, 1755, 1590, 1490, 1446, 1244, 1149, 956, 764, 691  $\text{cm}^{-1}$ ;  $^1\text{H}$  NMR ( $\text{CDCl}_3$ , 500 MHz):  $\delta$  = 11.03-10.73 (br, 1H), 7.60 (d,  $J$  = 7.1 Hz, 4H), 7.38-7.31 (m, 6H), 2.61-2.50 (m, 1H), 2.01 (d,  $J$  = 11.2 Hz, 2H), 1.83-1.76 (m, 2H), 1.68 (d,  $J$  = 12.0 Hz, 1H), 1.57-1.49 (m, 2H), 1.40-1.23 (m, 3H);  $^{13}\text{C}$  NMR ( $\text{CDCl}_3$ , 125 MHz):  $\delta$  = 173.9, 139.7, 129.7, 128.9, 128.6, 126.6, 43.2, 29.0, 25.7, 25.5; MS (MALDI/DHB)  $m/z$ : 347 (100) [ $\text{M}^+\text{H}$ ]; HRMS (MALDI/DHB)  $m/z$ : Calcd for  $\text{C}_{22}\text{H}_{23}\text{N}_2\text{O}_2$  [ $\text{M}+\text{H}$ ] $^+$ : 347.1754, found: 347.1754.

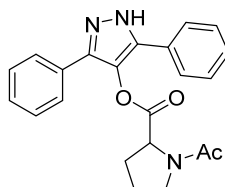

**3,5-Diphenyl-1H-pyrazol-4-yl acetylprolinatate (3ae):** Following the same procedure used for **3aa** with compound **1a** (107.5 mg, 0.3 mmol),  $\text{CuCl}_2$  (4.0 mg, 0.03 mmol), acetylproline (56.6 mg, 0.36 mmol),  $\text{K}_2\text{CO}_3$  (49.8 mg, 0.36 mmol) and  $\text{H}_2\text{O}$  (50  $\mu\text{L}$ ) in DMSO (1.5 mL). After 5 h at 50 °C, purification by column chromatography on silica gel (petroleum ether/EtOAc = 2/1) to yield **3ae** (67.5 mg, 60%) as a yellow oil. IR (KBr): 3395, 3036, 2926, 1771, 1623, 1448, 1363, 1248, 1140, 1027, 767  $\text{cm}^{-1}$ ;  $^1\text{H}$  NMR ( $\text{DMSO}-d_6$ , 500 MHz):  $\delta$  = 7.73 (d,  $J$  = 7.3 Hz, 4H), 7.46 (t,  $J$  = 7.6 Hz, 4H), 7.38 (t,  $J$  = 7.4 Hz, 2H), 4.67 (dd,  $J$  = 8.7, 3.8 Hz, 1H), 3.57-3.52 (m, 2H), 2.33-2.28 (m, 1H), 2.02 (s, 3H), 1.92-1.84 (m, 3H);  $^{13}\text{C}$  NMR ( $\text{DMSO}-d_6$ , 125 MHz):  $\delta$  = 170.8, 168.7, 140.5, 128.9, 128.8, 128.2, 127.9, 126.1, 58.0, 47.3, 28.9, 24.5, 22.0; MS (ESI)  $m/z$ : 376 (100) [ $\text{M}^+\text{H}$ ]; HRMS (ESI)  $m/z$ : Calcd for  $\text{C}_{22}\text{H}_{22}\text{N}_3\text{O}_3$  [ $\text{M}+\text{H}$ ] $^+$ : 376.1656, found: 376.1652.

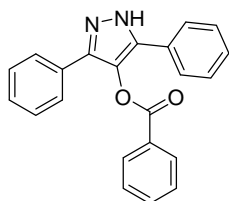

**3,5-Diphenyl-1H-pyrazol-4-yl benzoate (3af)**<sup>[1]</sup>: Following the same procedure used for **3aa** with compound **1a** (107.5 mg, 0.3 mmol), CuCl<sub>2</sub> (4.0 mg, 0.03 mmol), benzoic acid (44.0 mg, 0.36 mmol), K<sub>2</sub>CO<sub>3</sub> (49.8 mg, 0.36 mmol) and H<sub>2</sub>O (50 μL) in DMSO (1.5 mL). After 5 h at 50 °C, purification by column chromatography on silica gel (petroleum ether/EtOAc = 7/1) to yield **3af** (56.2 mg, 55%) as a white solid. M.p. 233-235 °C. IR (KBr): 3434, 3220, 3057, 1743, 1593, 1492, 1449, 1246, 1148, 1060, 957, 765, 699 cm<sup>-1</sup>; <sup>1</sup>H NMR (DMSO-*d*<sub>6</sub>, 500 MHz): δ = 13.63 (br, NH), 8.22-8.20 (m, 2H), 7.80-7.66 (m, 5H), 7.64 (t, *J* = 7.9 Hz, 2H), 7.46-7.28 (m, 6H); <sup>13</sup>C NMR (DMSO-*d*<sub>6</sub>, 125 MHz): δ = 164.4, 142.5, 134.6, 133.7, 132.0, 129.9, 129.3, 129.2, 128.7, 128.5, 128.2, 128.0, 127.8, 127.7, 125.6, 125.4; MS (EI) *m/z*: 340 (18) [M<sup>+</sup>], 105 (100).

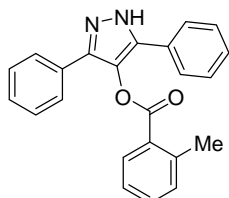

**3,5-Diphenyl-1H-pyrazol-4-yl 2-methylbenzoate (3ag)**: Following the same procedure used for **3aa** with compound **1a** (107.5 mg, 0.3 mmol), CuCl<sub>2</sub> (4.0 mg, 0.03 mmol), 2-methylbenzoic acid (49.0 mg, 0.36 mmol), K<sub>2</sub>CO<sub>3</sub> (49.8 mg, 0.36 mmol) and H<sub>2</sub>O (50 μL) in DMSO (1.5 mL). After 3 h at 50 °C, purification by column chromatography on silica gel (petroleum ether/EtOAc = 7/1) to yield **3ag** (62.7 mg, 59%) as a white solid. M.p. 288-290 °C; IR (KBr): 3212, 1744, 1607, 1589, 1485, 1256, 1182, 1150, 1082, 960, 769, 692 cm<sup>-1</sup>; <sup>1</sup>H NMR (DMSO-*d*<sub>6</sub>, 500 MHz): δ = 13.64-13.56 (br, 1H), 8.03-7.98 (m, 2H), 7.73 (d, *J* = 7.4 Hz, 2H), 7.65 (d, *J* = 7.5 Hz, 2H), 7.60 (d, *J* = 7.7 Hz, 1H), 7.53 (t, *J* = 7.7 Hz, 1H), 7.45 (t, *J* = 7.4 Hz, 2H), 7.39-7.35 (m, 3H), 7.29 (t, *J* = 6.9 Hz, 1H), 2.42 (s, 3H); <sup>13</sup>C NMR (DMSO-*d*<sub>6</sub>, 125 MHz): δ = 164.5, 142.5, 138.9, 135.2, 133.6, 131.9, 130.2, 129.2, 129.1, 128.7, 128.5, 128.2, 128.0, 127.8, 127.7, 127.1, 125.6, 125.4, 20.7; MS (MALDI/DHB) *m/z*: 355 (100) [M<sup>+</sup>H]; HRMS (MALDI/DHB) *m/z*: Calcd for C<sub>23</sub>H<sub>19</sub>N<sub>2</sub>O<sub>2</sub> [M+H]<sup>+</sup>: 355.1441, found: 355.1441.

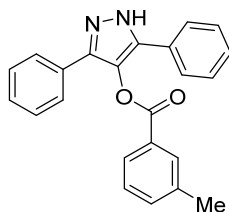

**3,5-Diphenyl-1H-pyrazol-4-yl 3-methylbenzoate (3ah)**: Following the same procedure used for **3aa** with compound **1a** (107.5 mg, 0.3 mmol), CuCl<sub>2</sub> (4.0 mg, 0.03 mmol), 3-methylbenzoic acid (49.0 mg, 0.36 mmol), K<sub>2</sub>CO<sub>3</sub> (49.8 mg, 0.36 mmol)

and H<sub>2</sub>O (50  $\mu$ L) in DMSO (1.5 mL). After 4 h at 50  $^{\circ}$ C, purification by column chromatography on silica gel (petroleum ether/EtOAc = 7/1) to yield **3ah** (59.5 mg, 56%) as a white solid. M.p. 206-209  $^{\circ}$ C. IR (KBr): 3225, 3037, 2927, 1740, 1595, 1487, 1447, 1229, 1143, 1033, 953, 730  $\text{cm}^{-1}$ ;  $^1\text{H}$  NMR (DMSO-*d*<sub>6</sub>, 500 MHz):  $\delta$  = 8.24 (d, *J* = 7.5 Hz, 1H), 7.71 (d, *J* = 7.6 Hz, 4H), 7.60 (t, *J* = 7.1 Hz, 1H), 7.46-7.40 (m, 6H), 7.34 (t, *J* = 7.3 Hz, 2H), 2.43 (s, 3H);  $^{13}\text{C}$  NMR (DMSO-*d*<sub>6</sub>, 125 MHz):  $\delta$  = 164.8, 140.5, 133.4, 132.1, 130.7, 128.9, 128.2, 128.1, 127.4, 126.7, 125.6, 125.5, 125.1, 21.1; MS (EI) *m/z*: 354 (6) [ $\text{M}^+$ ], 119 (100); HRMS (ESI) *m/z*: Calcd for C<sub>23</sub>H<sub>19</sub>N<sub>2</sub>O<sub>2</sub> [ $\text{M}+\text{H}$ ]<sup>+</sup>: 355.1441, found: 355.1434.

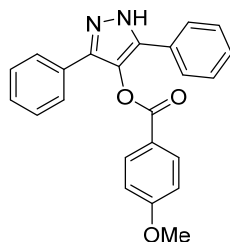

**3,5-Diphenyl-1H-pyrazol-4-yl 4-methoxybenzoate (3ai)**: Following the same procedure used for **3aa** with compound **1a** (107.5 mg, 0.3 mmol), CuCl<sub>2</sub> (4.0 mg, 0.03 mmol), 4-methoxybenzoic acid (54.8 mg, 0.36 mmol), K<sub>2</sub>CO<sub>3</sub> (49.8 mg, 0.36 mmol) and H<sub>2</sub>O (50  $\mu$ L) in DMSO (1.5 mL). After 4 h at 50  $^{\circ}$ C, purification by column chromatography on silica gel (petroleum ether/EtOAc = 5/1) to yield **3ai** (53.3 mg, 48%) as a white solid. M.p. 226-228  $^{\circ}$ C. IR (KBr): 3223, 1739, 1604, 1509, 1243, 1168, 1058, 1021, 957, 763  $\text{cm}^{-1}$ ;  $^1\text{H}$  NMR (CDCl<sub>3</sub>, 500 MHz):  $\delta$  = 9.66 (br, NH), 8.18 (d, *J* = 8.8 Hz, 2H), 7.68 (d, *J* = 7.2 Hz, 4H), 7.35-7.28 (m, 6H), 7.01 (d, *J* = 8.8 Hz, 2H), 3.90 (s, 3H);  $^{13}\text{C}$  NMR (CDCl<sub>3</sub>, 125 MHz):  $\delta$  = 164.4, 164.3, 139.8, 132.7, 129.8, 129.1, 129.0, 128.6, 126.4, 121.2, 114.2, 55.7; MS (ESI) *m/z*: 371 (100) [ $\text{M}^+\text{H}$ ]; HRMS (ESI) *m/z*: Calcd for C<sub>23</sub>H<sub>19</sub>N<sub>2</sub>O<sub>3</sub> [ $\text{M}+\text{H}$ ]<sup>+</sup>: 371.1390, found: 371.1390.

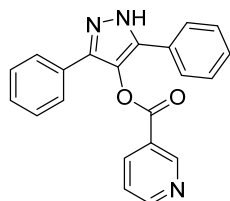

**3,5-Diphenyl-1H-pyrazol-4-yl nicotinate (3aj)**: Following the same procedure used for **3aa** with compound **1a** (107.5 mg, 0.3 mmol), CuCl<sub>2</sub> (4.0 mg, 0.03 mmol), nicotinic acid (44.3 mg, 0.36 mmol), K<sub>2</sub>CO<sub>3</sub> (49.8 mg, 0.36 mmol) and H<sub>2</sub>O (50  $\mu$ L) in DMSO (1.5 mL). After 27 h at 50  $^{\circ}$ C, purification by column chromatography on silica gel (petroleum ether/EtOAc = 3/1) to yield **3aj** (45.1 mg, 44%) as a white solid. M.p. 173-175  $^{\circ}$ C. IR (KBr): 3442, 2922, 2855, 1744, 1594, 1456, 1264, 1154, 1082, 1029, 948, 695  $\text{cm}^{-1}$ ;  $^1\text{H}$  NMR (DMSO-*d*<sub>6</sub>, 500 MHz):  $\delta$  = 13.65 (br, NH), 9.37 (s, 1H), 8.95-8.56 (m, 2H), 7.71-7.34 (m, 11H);  $^{13}\text{C}$  NMR (DMSO-*d*<sub>6</sub>, 125 MHz):  $\delta$  = 170.3, 163.5, 154.8, 150.7, 137.7, 129.2, 128.9, 127.9, 125.6, 124.4, 124.2; MS (EI) *m/z*: 341 (48) [ $\text{M}^+$ ], 106 (100); HRMS (ESI) *m/z*: Calcd for C<sub>21</sub>H<sub>16</sub>N<sub>3</sub>O<sub>2</sub> [ $\text{M}+\text{H}$ ]<sup>+</sup>: 342.1237, found: 342.1227.



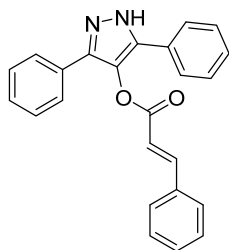

**3,5-Diphenyl-1H-pyrazol-4-yl cinnamate (3ak)**<sup>[1]</sup>: Following the same procedure used for **3aa** with compound **1a** (107.5 mg, 0.3 mmol), CuCl<sub>2</sub> (4.0 mg, 0.03 mmol), cinnamic acid (53.4 mg, 0.36 mmol), K<sub>2</sub>CO<sub>3</sub> (49.8 mg, 0.36 mmol) and H<sub>2</sub>O (50 μL) in DMSO (1.5 mL). After 8 h at 50 °C, purification by column chromatography on silica gel (petroleum ether/EtOAc = 7/1) to yield **3ak** (55.2 mg, 50%) as a white solid. M.p. 210-213 °C. IR (KBr): 3434, 3227, 2922, 1730, 1631, 1446, 1314, 1228, 1189, 1122, 954, 764, 688 cm<sup>-1</sup>; <sup>1</sup>H NMR (DMSO-*d*<sub>6</sub>, 500 MHz): δ = 13.55 (br, NH), 7.95 (d, *J* = 16.1 Hz, 1H), 7.86-7.33 (m, 15H), 7.04 (d, *J* = 16.1 Hz, 1H); <sup>13</sup>C NMR (DMSO-*d*<sub>6</sub>, 125 MHz): δ = 164.9, 147.6, 133.7, 131.2, 129.2, 129.0, 128.9, 128.8, 128.3, 127.8, 125.6, 125.4, 116.3; MS (EI) *m/z*: 366 (2) [M<sup>+</sup>], 220 (100).

#### 4. Mechanistic Studies

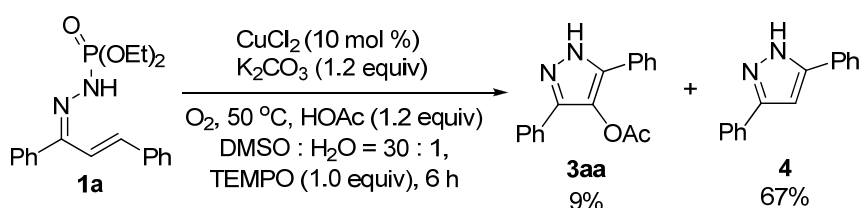

A mixture of **1a** (107.5 mg, 0.3 mmol), CuCl<sub>2</sub> (4.0 mg, 0.03 mmol), AcOH (21.6 mg, 0.36 mmol), K<sub>2</sub>CO<sub>3</sub> (49.8 mg, 0.36 mmol), TEMPO (46.9 mg, 0.3 mmol) and H<sub>2</sub>O (50 μL) in DMSO (1.5 mL) was stirred at 50 °C for 6 h under O<sub>2</sub>. The reaction was cooled to room temperature after complete consumption of **1a** as monitored by TLC analysis, diluted by EtOAc (10 mL) and H<sub>2</sub>O (30 mL). The aqueous layer was extracted with EtOAc (3×10 mL) and the combined organic layer was dried over Na<sub>2</sub>SO<sub>4</sub>, filtered and concentrated in vacuum. The residue was purified by column chromatography on silica gel (petroleum ether/ EtOAc = 7:1) to give **3aa** (7.5 mg, 9%) and **4** (44.3 mg, 67%).

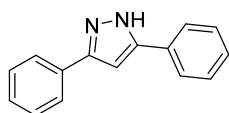

**3,5-Diphenyl-1H-pyrazole (4)**<sup>[2]</sup>: White solid. M.p. 202-204 °C. IR (KBr): 3425, 3096, 3001, 2856, 1606, 1570, 1495, 1461, 1294, 1272, 1180, 1074, 1056, 975, 915, 752, 686 cm<sup>-1</sup>; <sup>1</sup>H NMR (CDCl<sub>3</sub>, 500 MHz): δ = 8.24 (br, NH), 7.74-7.72 (m, 4H), 7.40-7.32 (m, 6H), 6.84 (s, 1H); <sup>13</sup>C NMR (CDCl<sub>3</sub>, 125 MHz): δ = 148.8, 131.2,

128.9, 128.4, 125.8, 100.2; MS (EI) m/z: 220 (100) [M<sup>+</sup>], 191 (21), 77 (26).

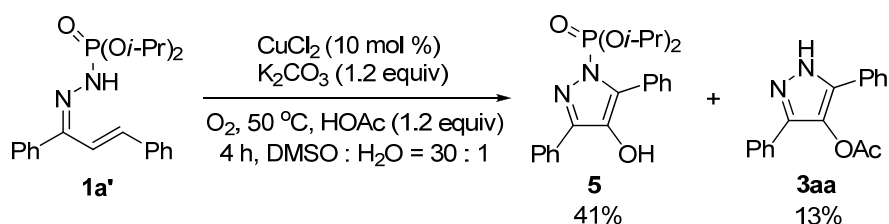

A mixture of **1a'** (115.9 mg, 0.3 mmol), CuCl<sub>2</sub> (4.0 mg, 0.03 mmol), HOAc (21.6 mg, 0.36 mmol), K<sub>2</sub>CO<sub>3</sub> (49.8 mg, 0.36 mmol) and H<sub>2</sub>O (50 μL) in DMSO (1.5 mL) was stirred at 50 °C for 4 h under O<sub>2</sub>. The reaction was cooled to room temperature after complete consumption of **1a'** as monitored by TLC analysis. Upon completion, the reaction was diluted by EtOAc (10 mL) and H<sub>2</sub>O (30 mL). The aqueous layer was extracted with EtOAc (3×10 mL) and the combined organic layer was dried over Na<sub>2</sub>SO<sub>4</sub>, then filtered and concentrated in vacuo. The residue was purified by column chromatography on silica gel (petroleum ether/EtOAc = 5/1) to give **5** (49.3 mg, 41%) and **3aa** (10.8 mg, 13%).

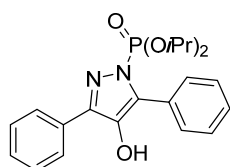

**Diisopropyl (4-hydroxy-3,5-diphenyl-1H-pyrazol-1-yl)phosphonate (5):** A pale yellow solid. M.p. 118-121 °C. IR (KBr): 3125, 2979, 1456, 1237, 1140, 1007, 803, 690 cm<sup>-1</sup>; <sup>1</sup>H NMR (DMSO-*d*<sub>6</sub>, 500 MHz): δ = 8.65 (s, 1H), 8.03-8.01 (m, 2H), 7.54-7.52 (m, 2H), 7.50-7.45 (m, 4H), 7.44 (d, *J* = 7.2 Hz, 1H), 7.39 (t, *J* = 6.9 Hz, 1H), 4.64-4.57 (m, 2H), 1.22 (d, *J* = 6.2 Hz, 6H), 1.15 (d, *J* = 6.2 Hz, 6H); <sup>13</sup>C NMR (DMSO-*d*<sub>6</sub>, 125 MHz): δ = 145.0 (d, <sup>2</sup>*J*<sub>P-C</sub> = 11.3 Hz), 138.3 (d, <sup>3</sup>*J*<sub>P-C</sub> = 8.8 Hz), 135.3 (d, <sup>3</sup>*J*<sub>P-C</sub> = 11.3 Hz), 131.8, 130.3, 128.9, 128.5, 128.4, 128.2, 127.8, 126.4, 73.9 (d, <sup>2</sup>*J*<sub>P-C</sub> = 6.3 Hz), 23.3 (d, <sup>3</sup>*J*<sub>P-C</sub> = 3.8 Hz), 22.8 (d, <sup>3</sup>*J*<sub>P-C</sub> = 6.3 Hz); MS (EI) m/z: 400 (10) [M<sup>+</sup>], 236 (100). HRMS (ESI) m/z: Calcd for C<sub>21</sub>H<sub>26</sub>N<sub>2</sub>O<sub>4</sub>P [M+H]<sup>+</sup>: 401.1625, found: 401.1622.

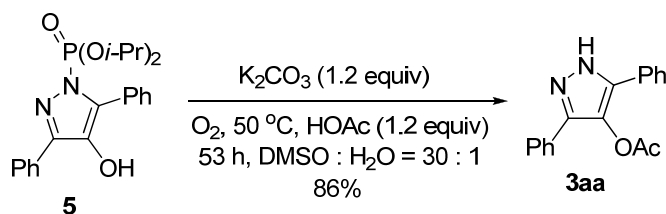

A mixture of **5** (40.0 mg, 0.1 mmol), AcOH (7.2 mg, 0.12 mmol), K<sub>2</sub>CO<sub>3</sub> (16.6 mg, 0.12 mmol), and H<sub>2</sub>O (17 μL) in DMSO (0.5 mL) was stirred at 50 °C for 53 h under O<sub>2</sub>. The reaction was cooled to room temperature after complete consumption of **5** as monitored by TLC analysis, diluted by EtOAc (10 mL) and H<sub>2</sub>O (30 mL). The aqueous layer was extracted with EtOAc (3×10 mL) and the combined organic layer

was dried over Na<sub>2</sub>SO<sub>4</sub>, filtered and concentrated in vacuum. The residue was purified by column chromatography on silica gel (petroleum ether/ EtOAc = 7:1) to give **3aa** (23.8 mg, 86%).

## 5. X-Ray Crystal Structure for Compound **3aa**

Crystallographic data for **3aa**: C<sub>17</sub>H<sub>14</sub>N<sub>2</sub>O<sub>2</sub>, M = 278.30, triclinic, P-1 (No. 2), a = 5.834 (16) Å, b = 12.53 (4) Å, c = 19.70 (5) Å, α = 87.16 (4)°, β = 86.36 (4)°, γ = 88.79 (4)°, V = 1436 (7) Å<sup>3</sup>, Z = 4, Crystal size: 0.10 × 0.06 × 0.03 mm, T = 295 K, ρ<sub>calcd</sub> = 1.287 g·cm<sup>-3</sup>, R<sub>1</sub> = 0.0849 (I > 4σ(I)), wR<sub>2</sub> = 0.3048 (all data), GOF = 1.088, reflections collected/unique: 4973 / 2892 (R<sub>int</sub> = 0.0213, Data: 4973, restraints: 0, parameters: 370. CCDC 1032969 contains the supplementary crystallographic data for this paper. The data can be obtained free of charge from The Cambridge Crystallographic Data Centre via [www.ccdc.cam.ac.uk/data\\_request/cif](http://www.ccdc.cam.ac.uk/data_request/cif).

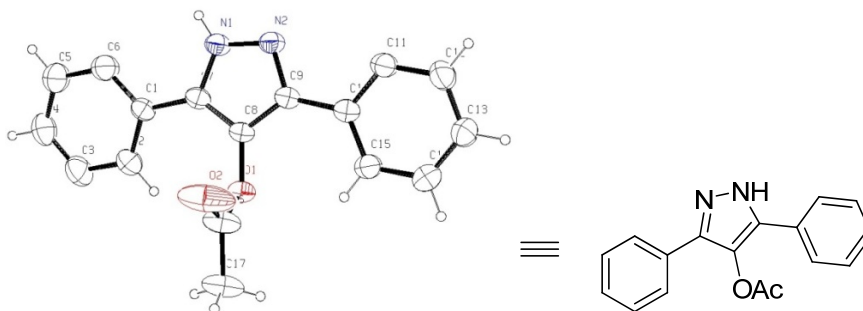

## 6. References

- [1] O. Bruno, F. Bondavalli, A. Ranise, P. Schenone, C. Losasso, L. Cilenti, C. Matera, E. Marmo, *Farmaco.*, 1990, **45**, 147.
- [2] J. Wen, Y. Fu, R.-Y. Zhang, J. Zhang, S.-Y. Chen, X.-Q. Yu, *Tetrahedron*, 2011, **67**, 9618.

## 7. Copies of $^1\text{H}$ and $^{13}\text{C}$ NMR Spectra for All Compounds

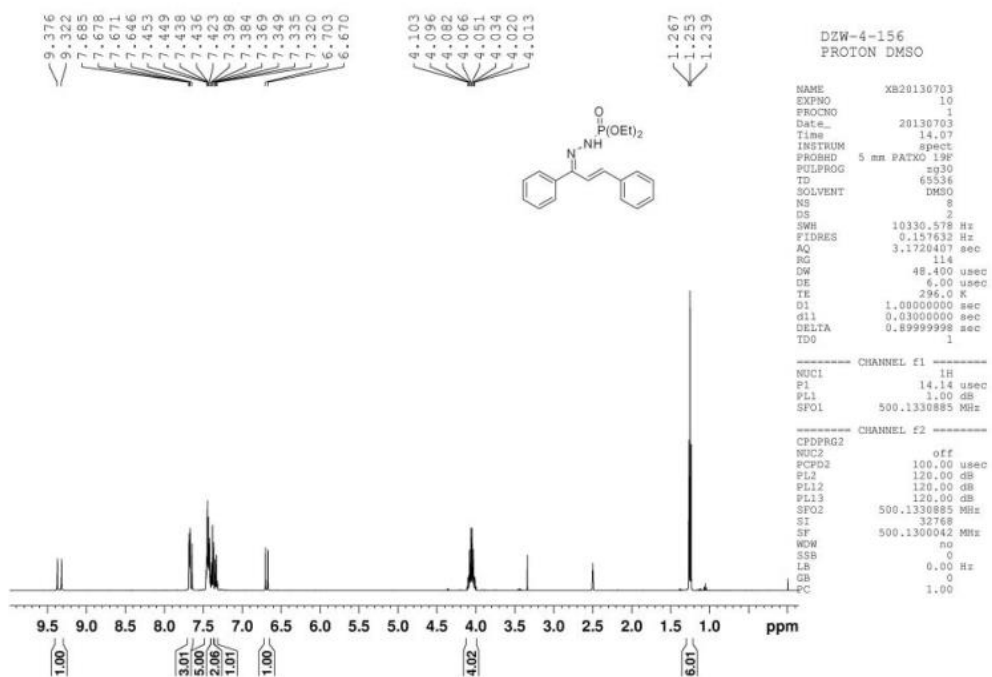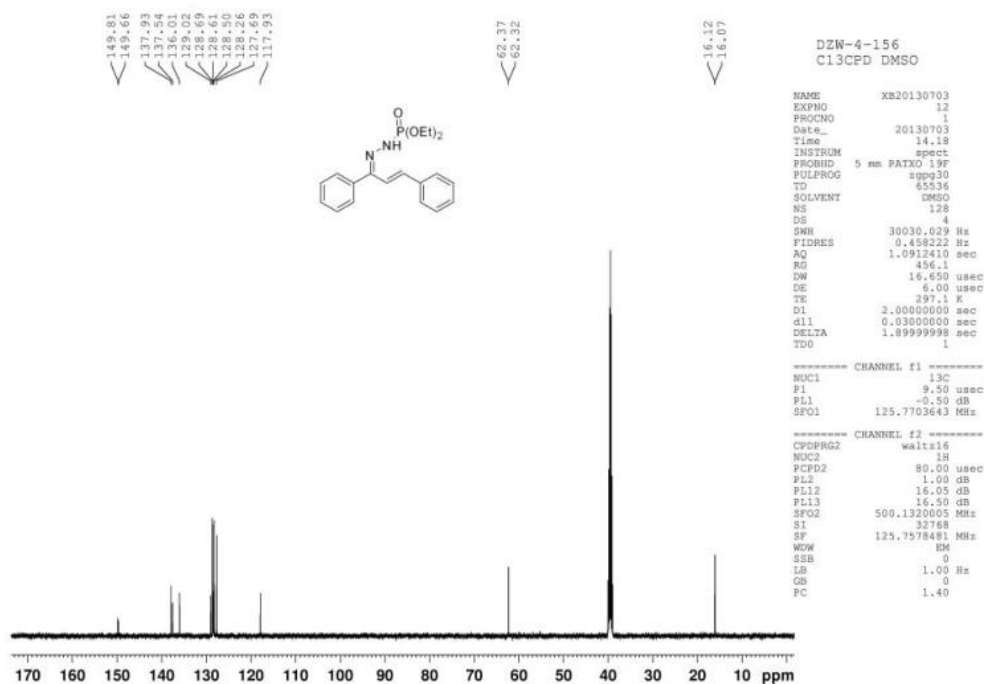

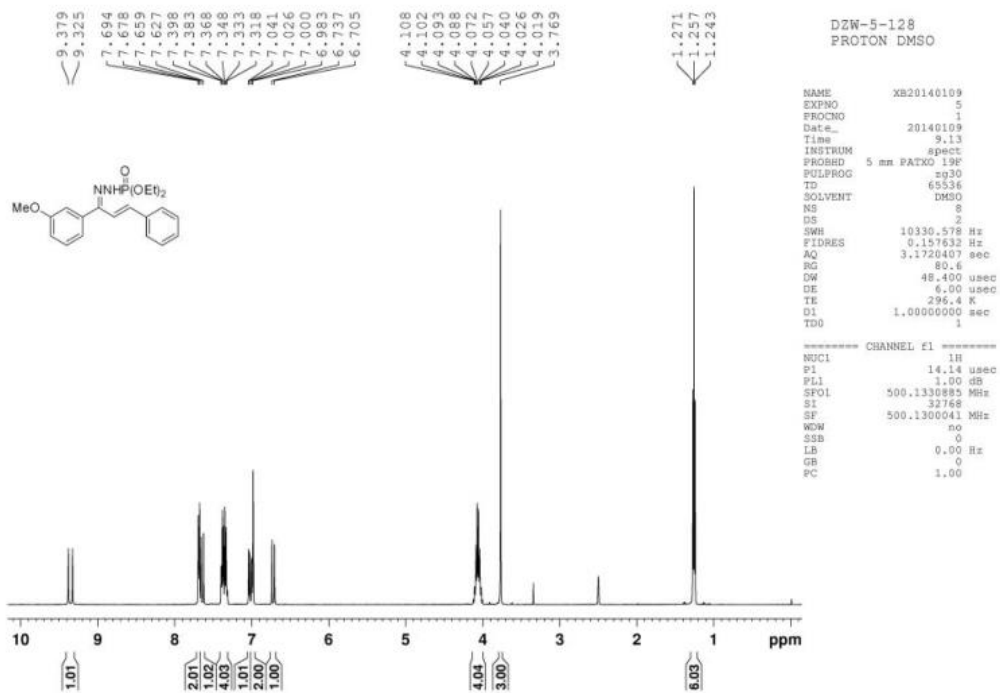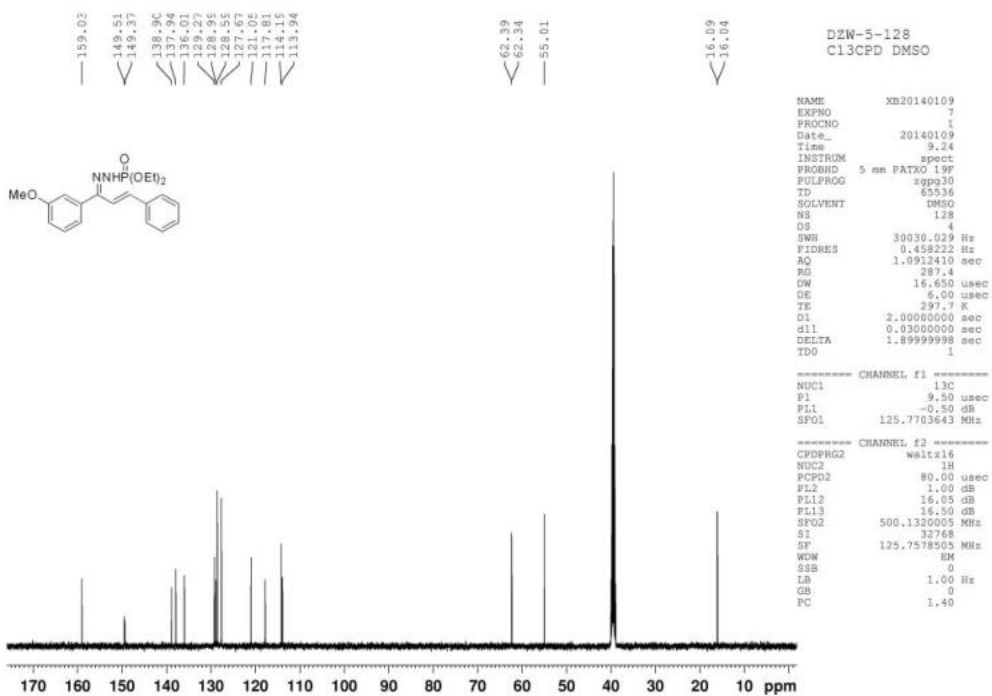

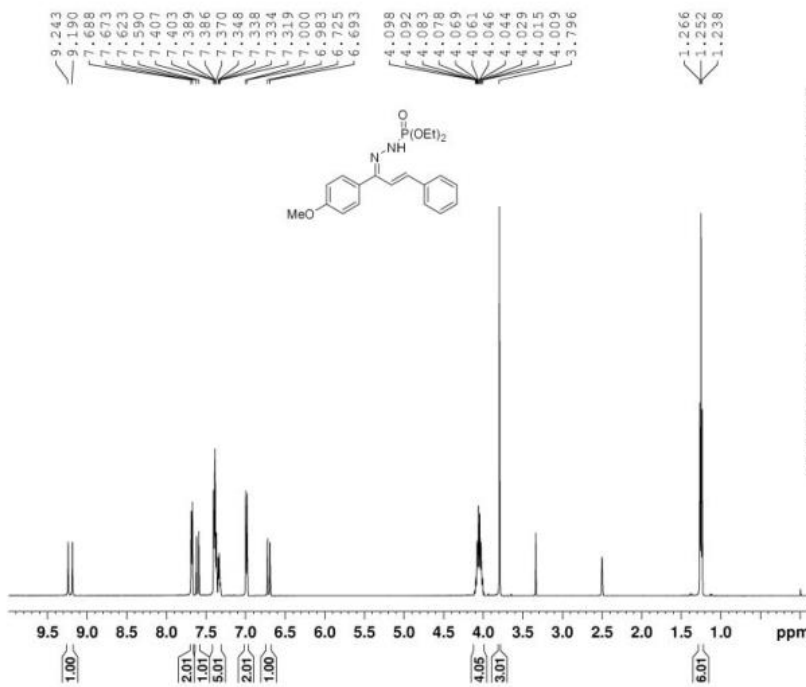

DZW-5-84  
PROTON DMSO

```

NAME      XB20130922
EXPNO    1
PROCNO   1
Date_    20130922
Time     13.03
INSTRUM  spect
PROBHD   5 mm PATXO 19F
PULPROG  zg30
TD        65536
SOLVENT  DMSO
NS        8
DS        2
SWH       10330.578 Hz
FIDRES    0.157632 Hz
AQ        3.1720407 sec
RG        401.6
DW        48.400 usec
DE        6.00 usec
TE        296.6 K
D1        1.0000000 sec
TDO       1

----- CHANNEL f1 -----
NUC1      1H
P1        14.14 usec
PL1       1.00 dB
SFO1      500.130085 MHz
SI        32768
SF        500.1300043 MHz
WDW       no
SSB       0
LB        0.00 Hz
GB        0
PC        1.00

```

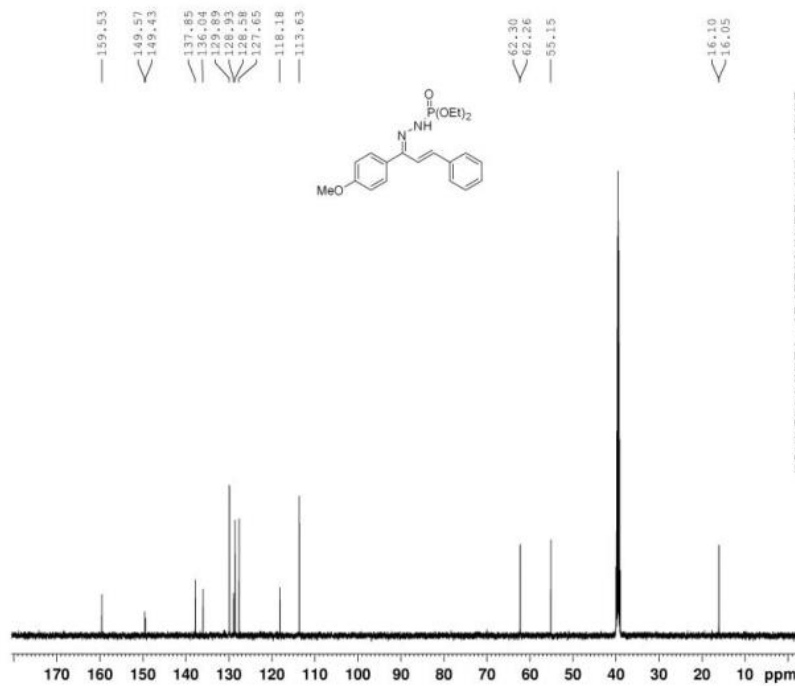

DZW-5-84  
C13CPD DMSO

```

NAME      XB20130922
EXPNO    3
PROCNO   1
Date_    20130922
Time     13.13
INSTRUM  spect
PROBHD   5 mm PATXO 19F
PULPROG  zg30
TD        65536
SOLVENT  DMSO
NS        128
DS        4
SWH       30030.029 Hz
FIDRES    0.488222 Hz
AQ        1.0912410 sec
RG        512
DW        16.650 usec
DE        6.00 usec
TE        297.9 K
D1        2.0000000 sec
TDO       1

----- CHANNEL f1 -----
NUC1      13C
P1        9.50 usec
PL1       -0.50 dB
SFO1      125.7703643 MHz
SI        32768
SF        125.7578507 MHz
WDW       EM
SSB       0
LB        1.00 Hz
GB        0
PC        1.40

```

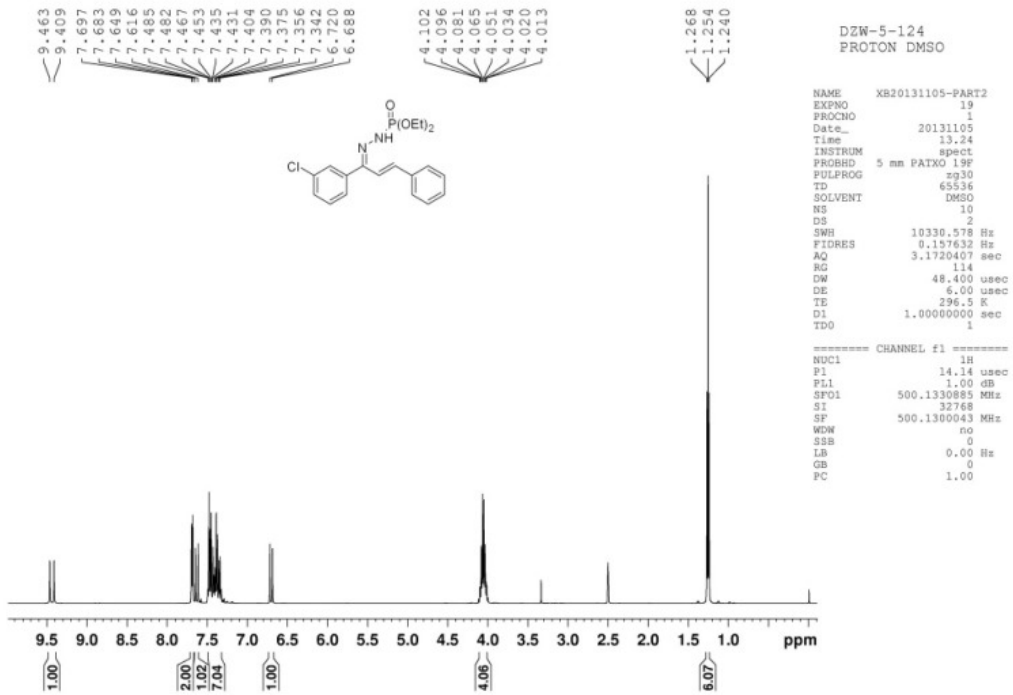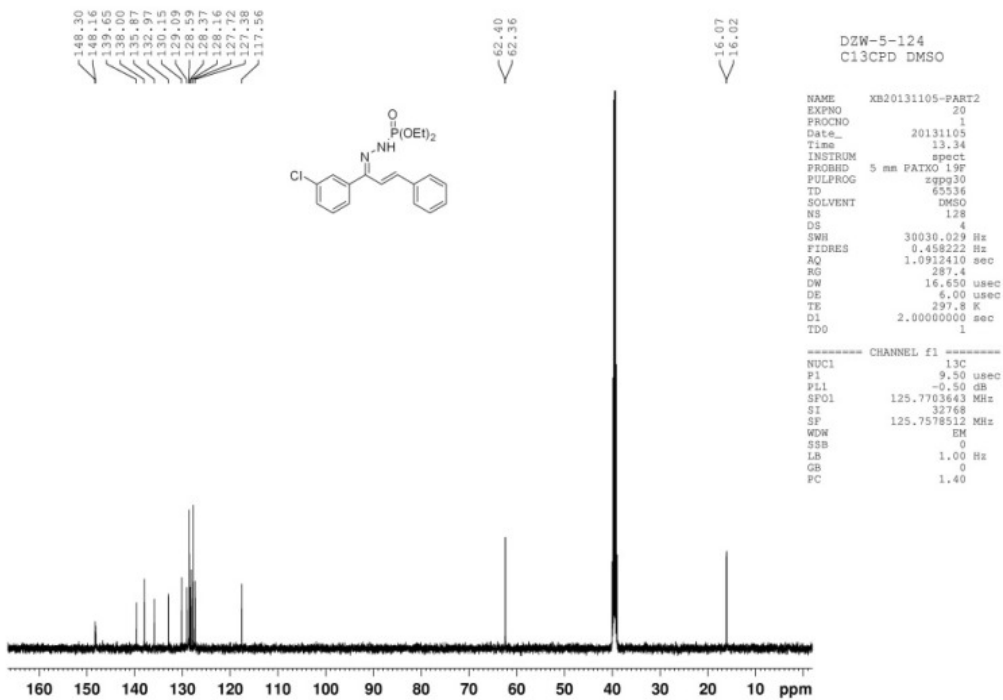

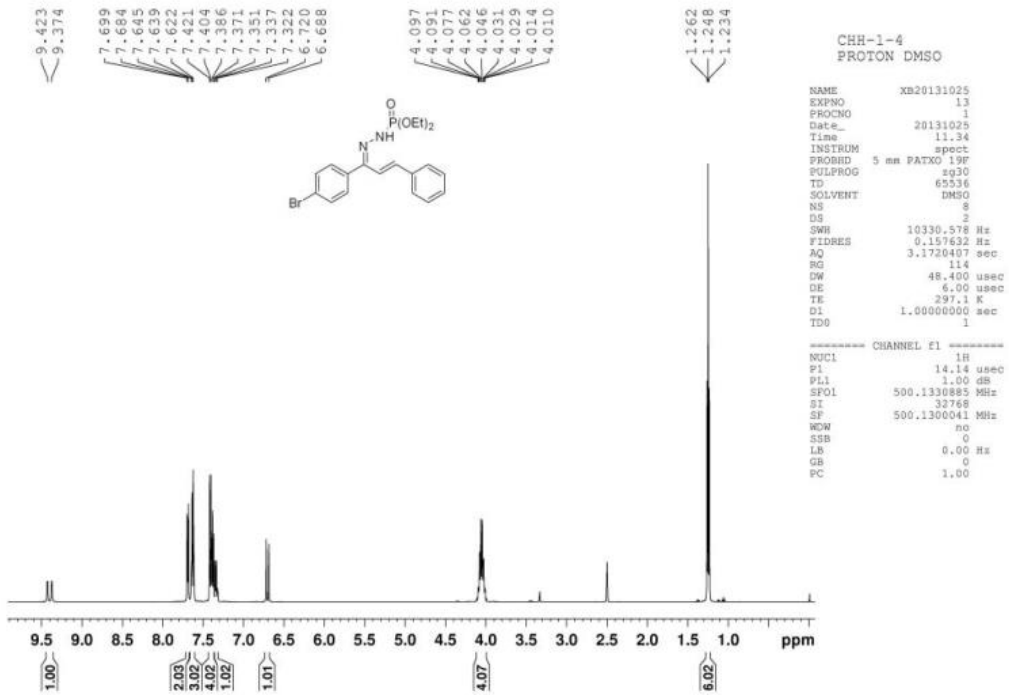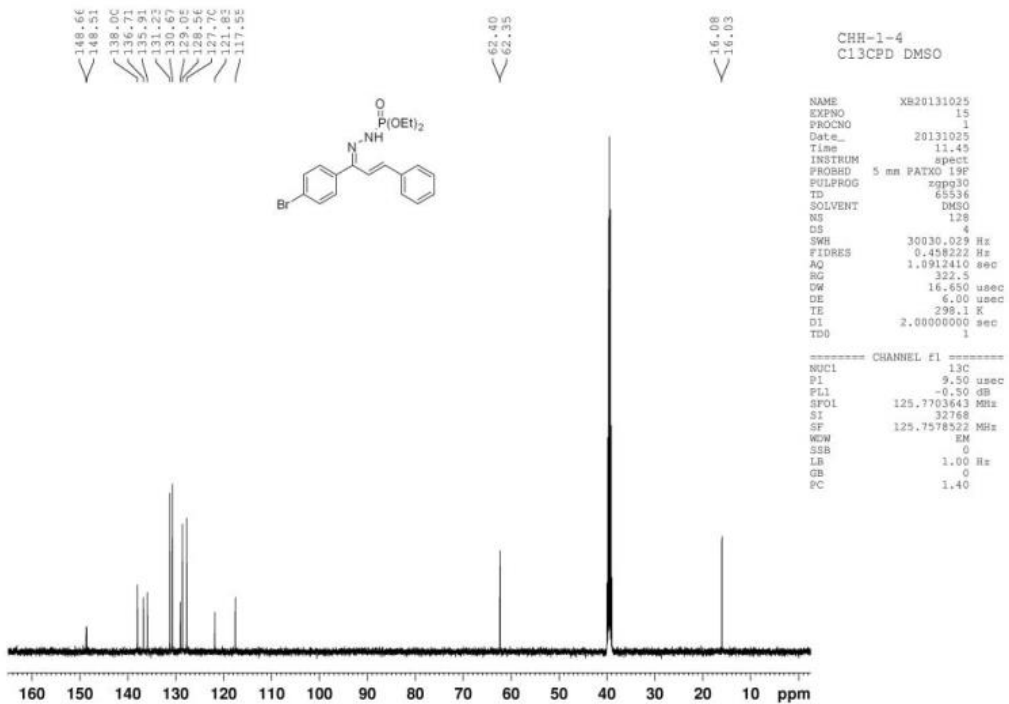



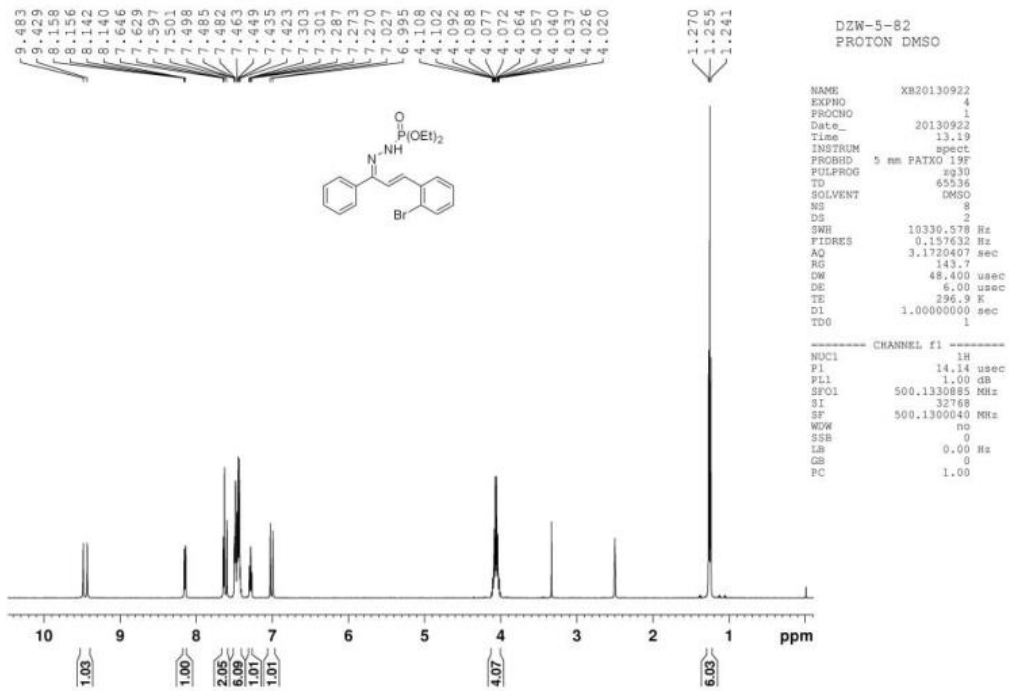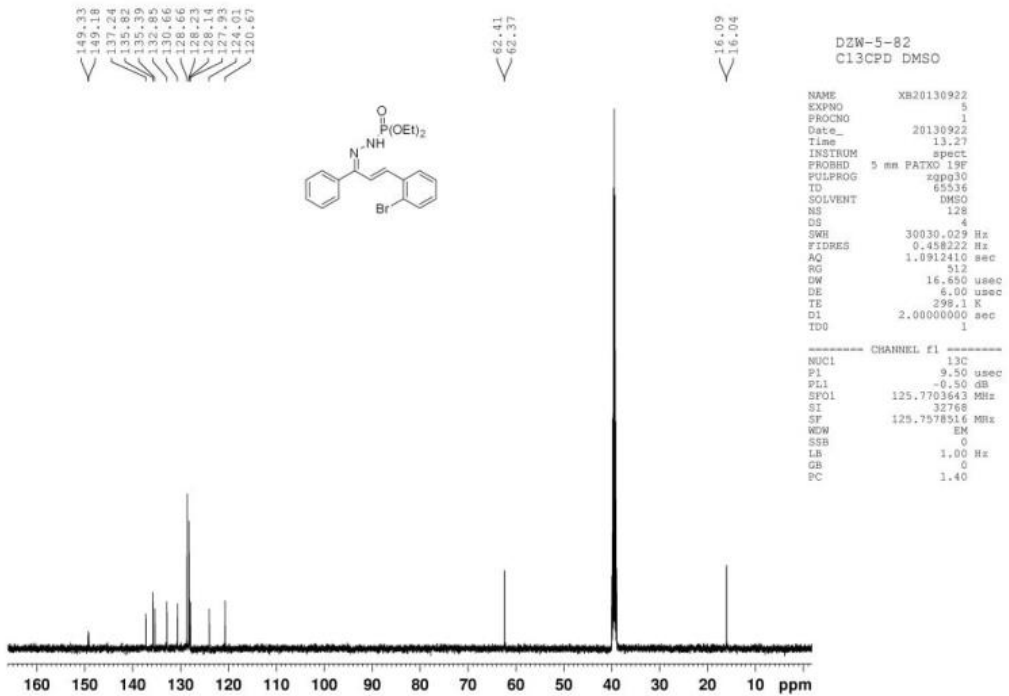

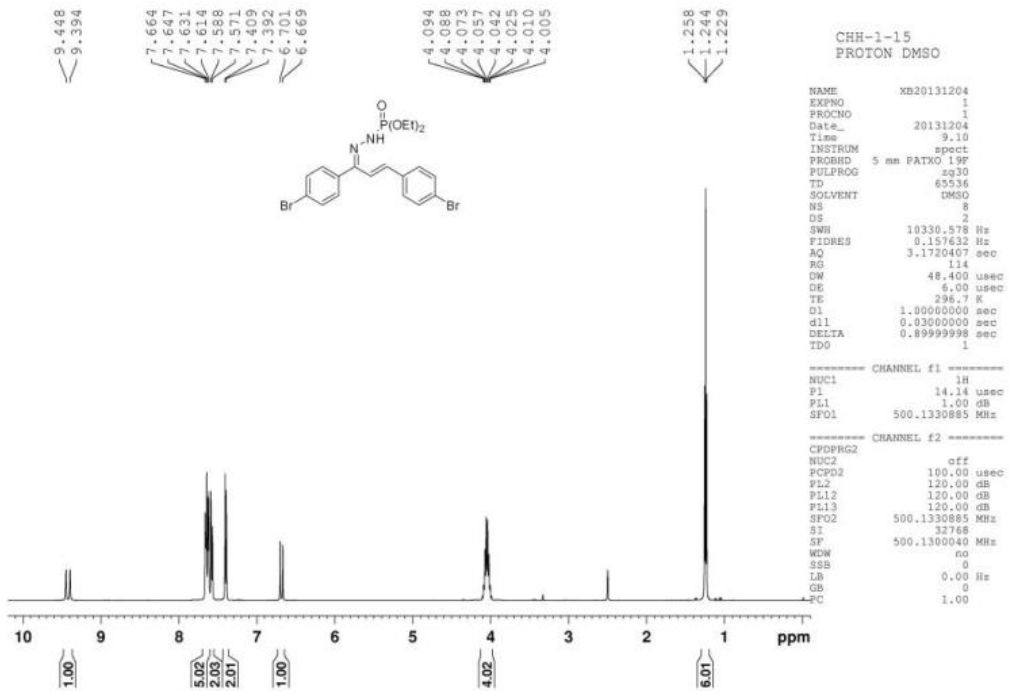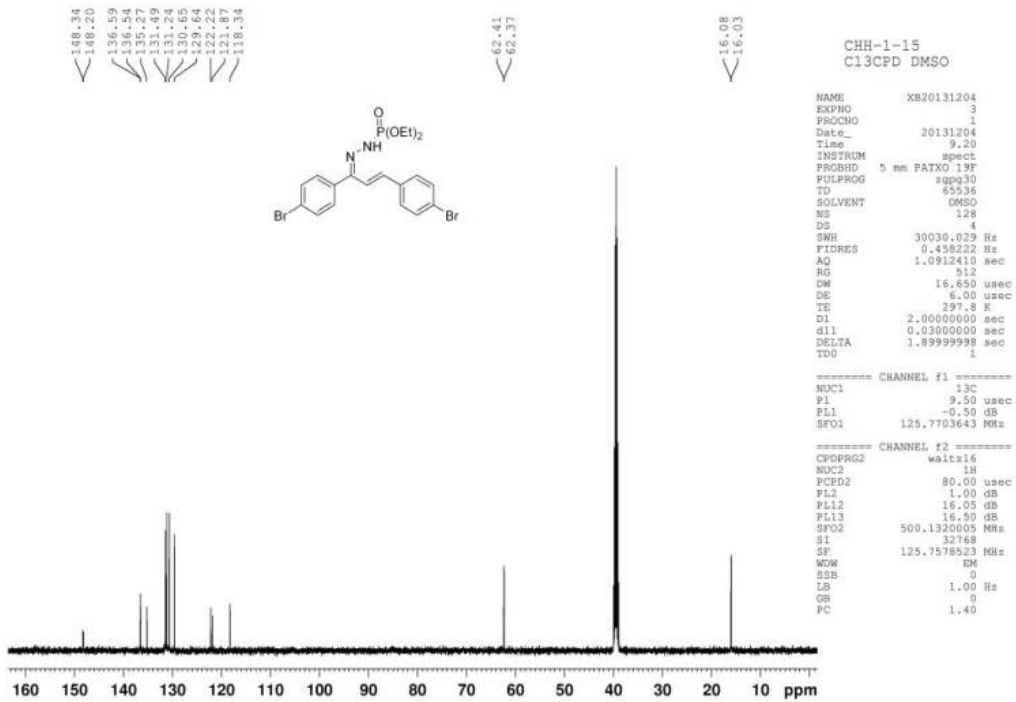

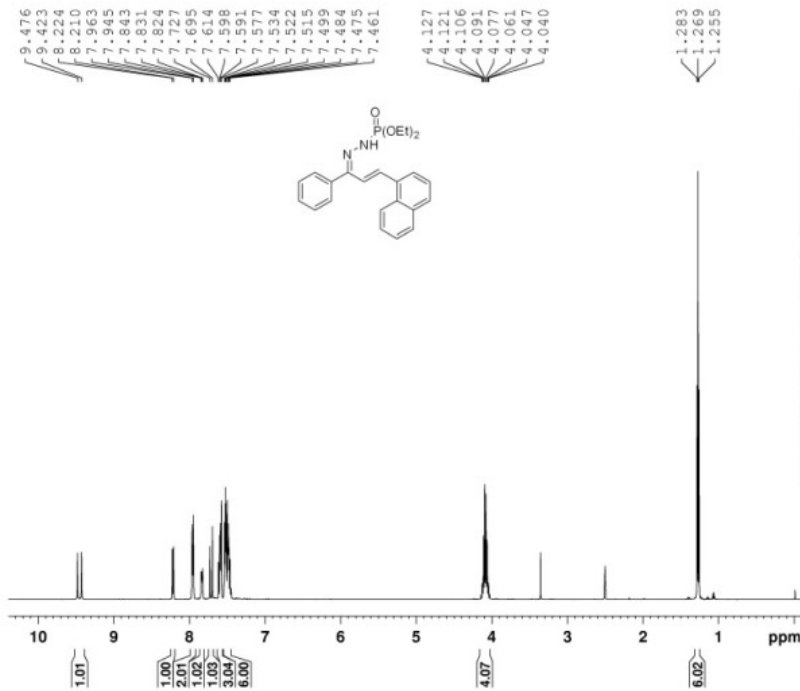

DZW-5-115  
PROTON DMSO

NAME xb20131015  
EXPNO 3  
PROCNO 1  
Date\_ 20131015  
Time 10.17  
INSTRUM spect  
PROBHD 5 mm PATXO 19F  
PULPROG zg30  
TD 65536  
SOLVENT DMSO  
NS 8  
DS 2  
SWH 10330.578 Hz  
FIDRES 0.157632 Hz  
AQ 3.1720407 sec  
RG 90.5  
DW 48.400 usec  
DE 6.00 usec  
TE 296.6 K  
D1 1.00000000 sec  
TD0 1

----- CHANNEL f1 -----  
NUC1 1H  
P1 14.14 usec  
PL1 1.00 dB  
SFO1 500.1330885 MHz  
SI 32768  
SF 500.1300042 MHz  
WDW no  
SSB 0  
LB 0.00 Hz  
GB 0  
PC 1.00

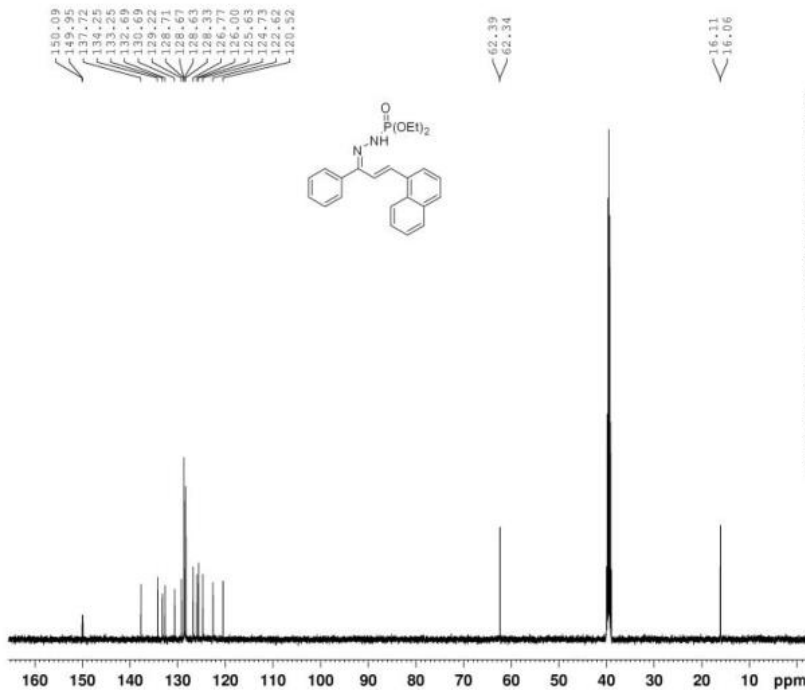

DZW-5-115  
C13CPD DMSO

NAME xb20131015  
EXPNO 5  
PROCNO 1  
Date\_ 20131015  
Time 10.28  
INSTRUM spect  
PROBHD 5 mm PATXO 19F  
PULPROG zgpg30  
TD 65536  
SOLVENT DMSO  
NS 128  
DS 4  
SWH 30030.029 Hz  
FIDRES 0.458222 Hz  
AQ 1.0912410 sec  
RG 256  
DW 16.450 usec  
DE 6.00 usec  
TE 297.9 K  
D1 2.00000000 sec  
TD0 1

----- CHANNEL f1 -----  
NUC1 13C  
P1 9.50 usec  
PL1 -0.50 dB  
SFO1 125.7703643 MHz  
SI 32768  
SF 125.7578515 MHz  
WDW EM  
SSB 0  
LB 1.00 Hz  
GB 0  
PC 1.40

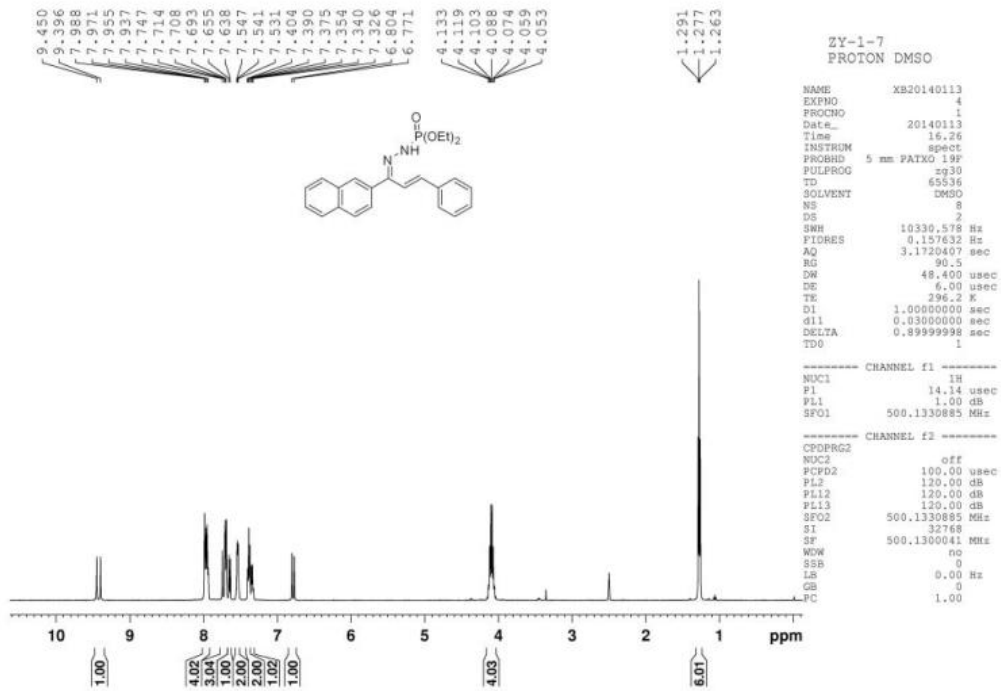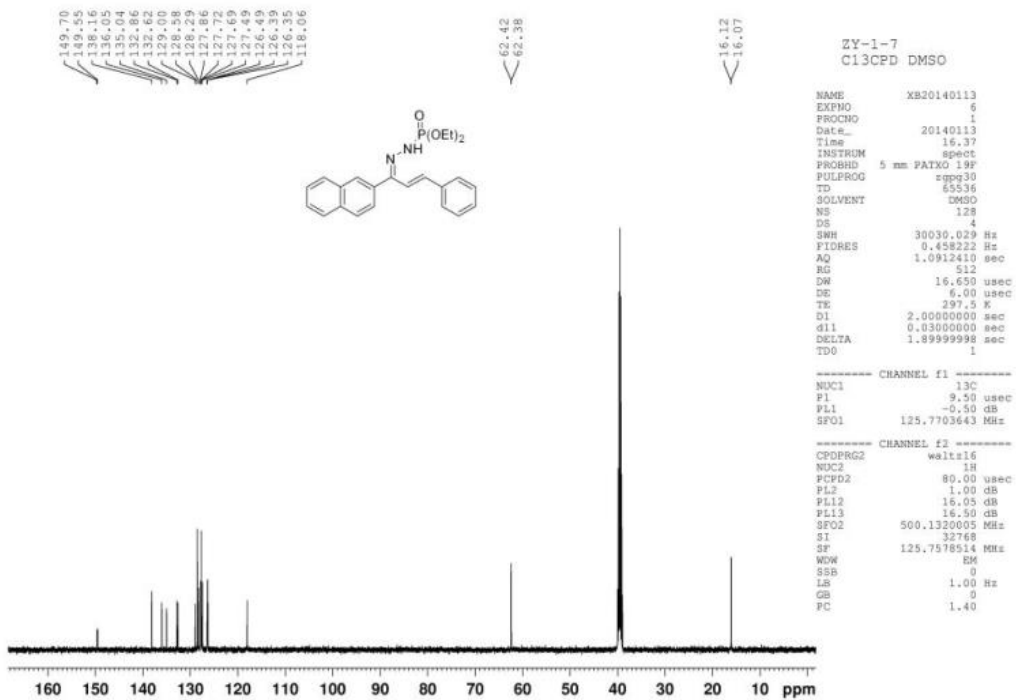

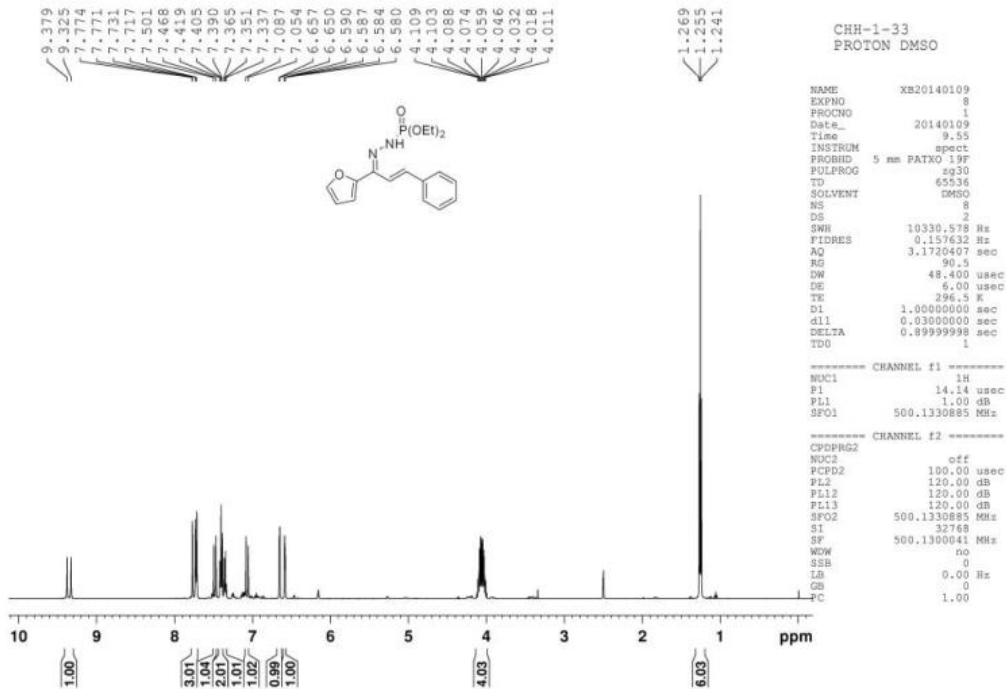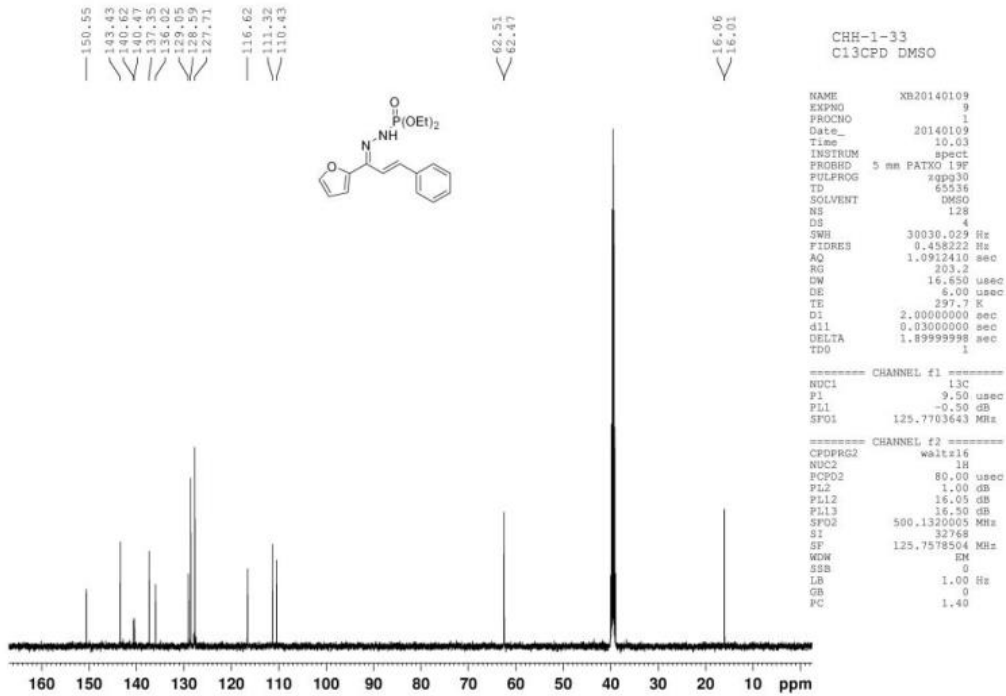

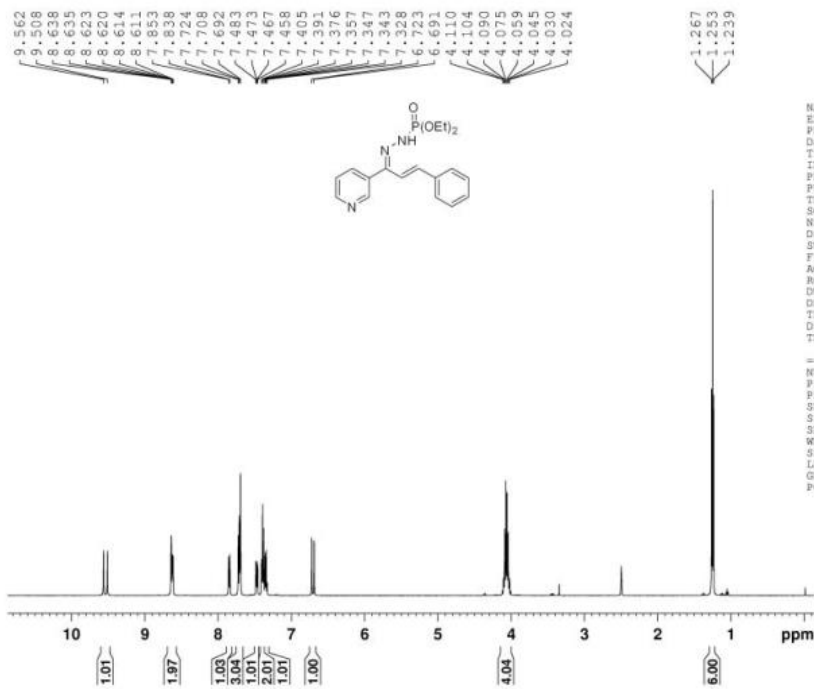

CHH-1-42  
PROTON DMSO

```

NAME      XB20140411
EXPNO     4
PROCNO    1
Date_     20140411
Time      9.07
INSTRUM   spect
PROBHD    5 mm PATXO 19P
PULPROG   zg30
TD         65336
SOLVENT   DMSO
NS         8
DS         2
SWH        10330.578 Hz
FIDRES     0.157632 Hz
AQ         3.1720407 sec
RG         90.5
DW         48.400 usec
DE         6.00 usec
TE         295.9 K
D1         1.00000000 sec
TDO        1
  
```

```

----- CHANNEL f1 -----
NUC1      1H
P1        14.14 usec
PL1       1.00 dB
SFO1      500.133088 MHz
SI        32768
SF        500.1300038 MHz
WDW       no
SSB       0
LB        0.00 Hz
GB        0
PC        1.00
  
```

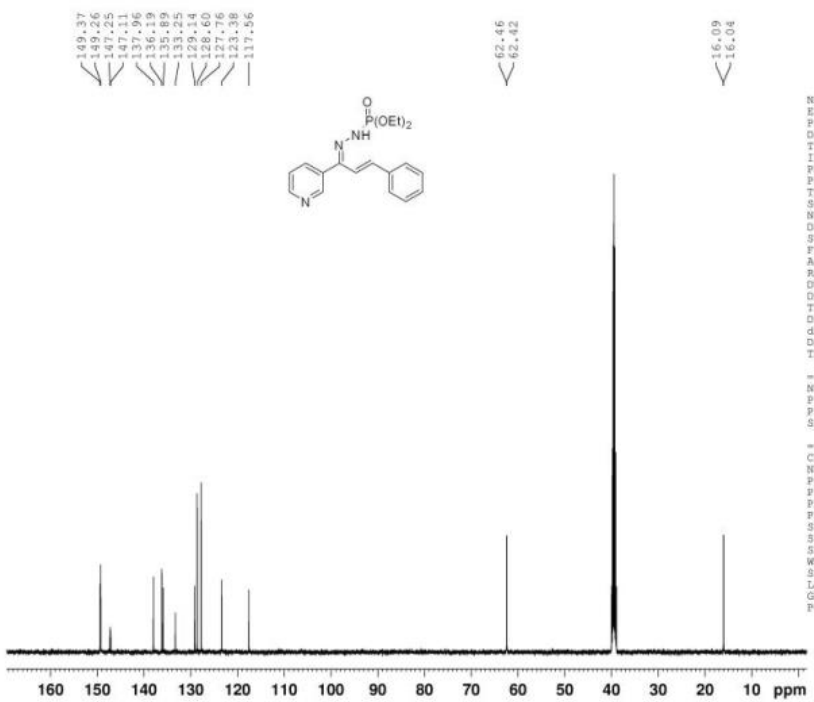

CHH-1-42  
C13CPD DMSO

```

NAME      XB20140411
EXPNO     6
PROCNO    1
Date_     20140411
Time      9.24
INSTRUM   spect
PROBHD    5 mm PATXO 19P
PULPROG   zgpg30
TD         65336
SOLVENT   DMSO
NS         256
DS         4
SWH        30030.029 Hz
FIDRES     0.458222 Hz
AQ         1.0912410 sec
RG         228.1
DW         16.650 usec
DE         6.00 usec
TE         297.4 K
D1         2.00000000 sec
d11        0.03000000 sec
DELTA     1.89999998 sec
TDO        1
  
```

```

----- CHANNEL f1 -----
NUC1      13C
P1         9.50 usec
PL1        -0.50 dB
SFO1      125.7703643 MHz
  
```

```

----- CHANNEL f2 -----
CPDPRG2   waltz16
NUC2       13C
PCPD2     80.00 usec
PL2        1.00 dB
PL12      16.05 dB
PL13      16.50 dB
SFO2      500.1320005 MHz
SI        32768
SF        125.7578505 MHz
WDW       EM
SSB       0
LB        1.00 Hz
GB        0
PC        1.40
  
```

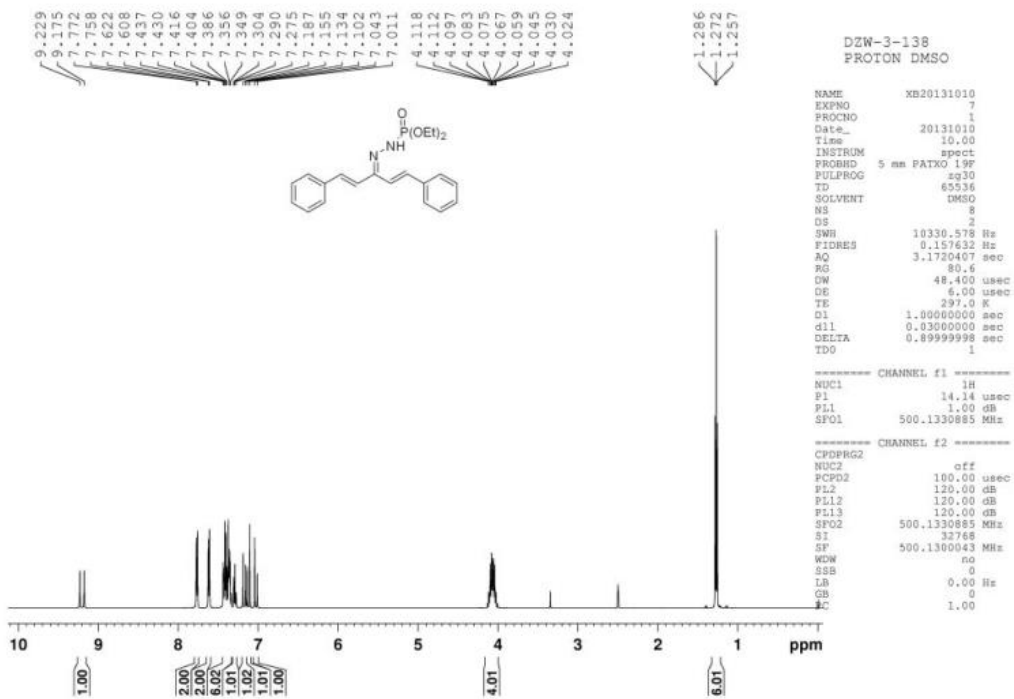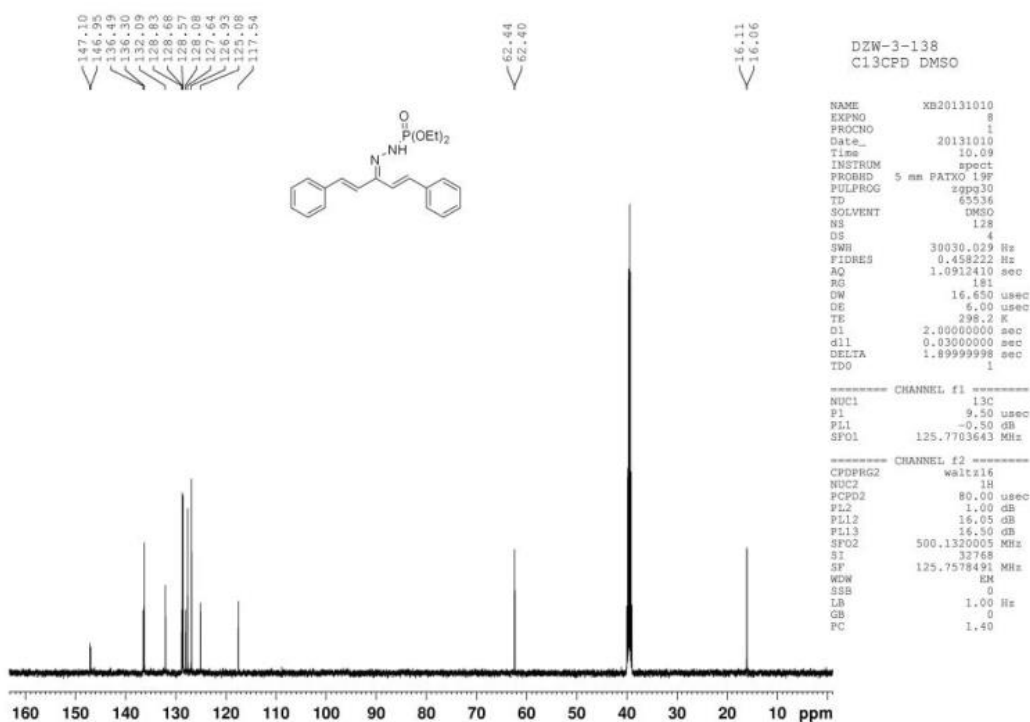

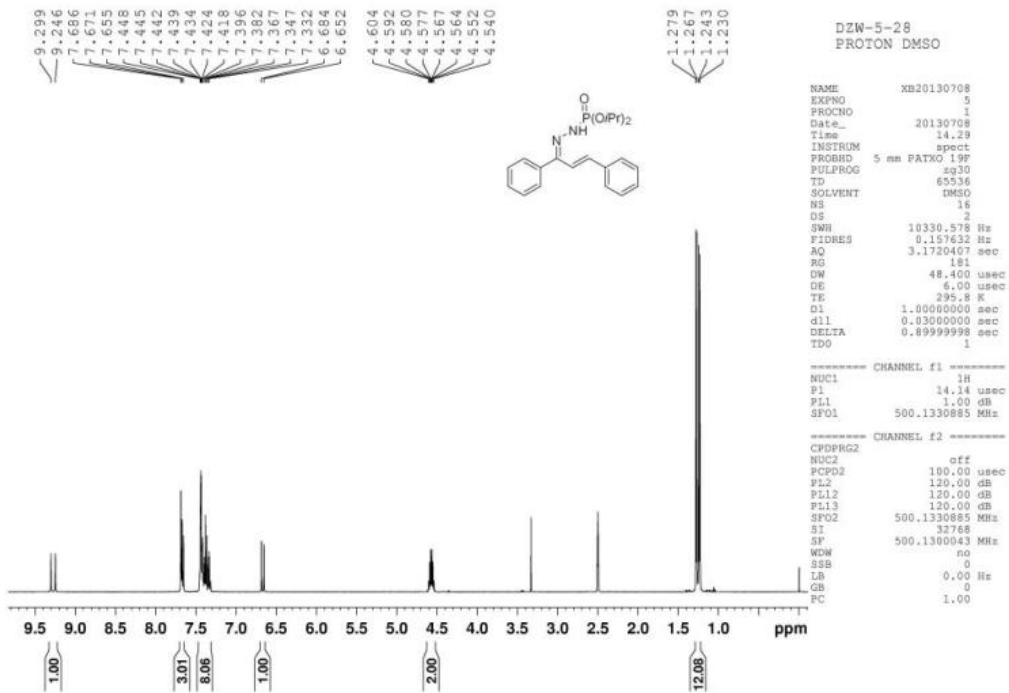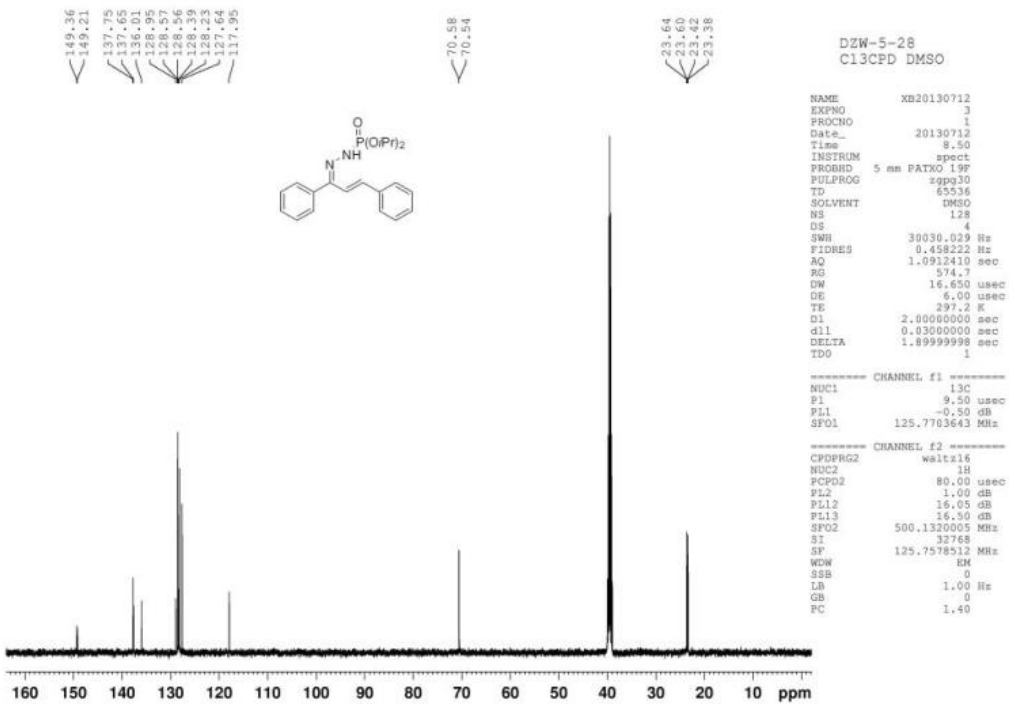



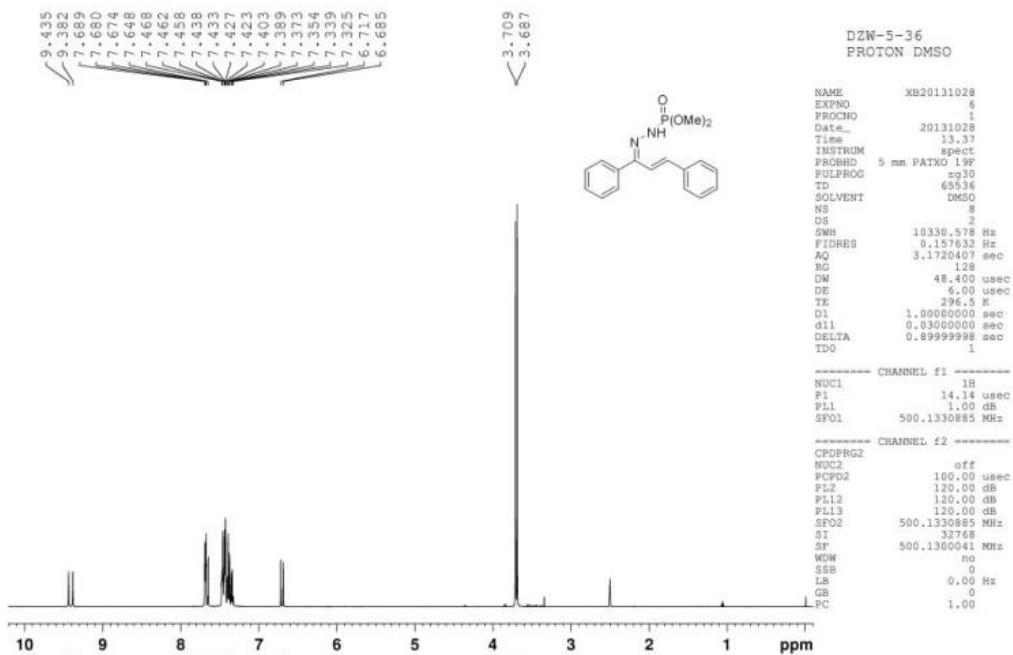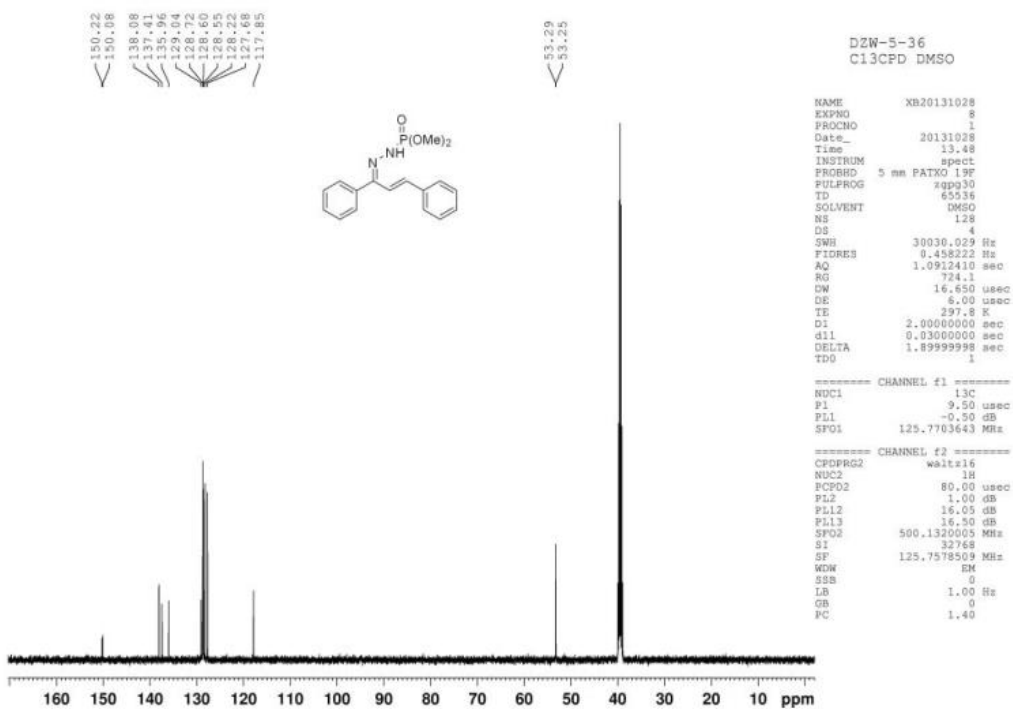

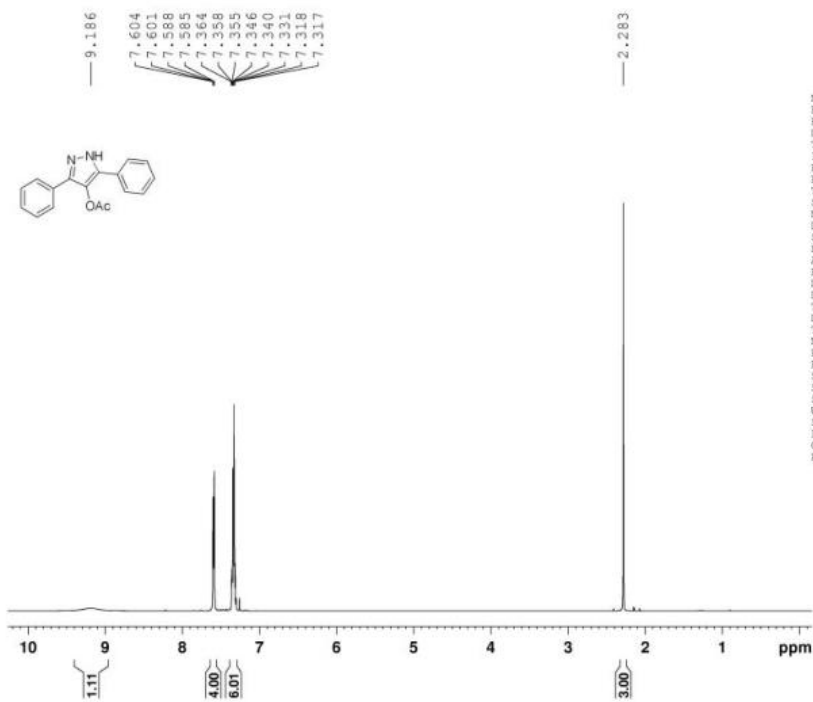

DZW-4-103  
PROTON CDC13

```

NAME      XB20130510
EXPNO     9
PROCNO    1
Date_     20130510
Time      12.48
INSTRUM   spect
PROBHD    5 mm PATKO 19F
PULPROG   zg30
TD         65536
SOLVENT   CDC13
NS         8
DS         2
SWH        10330.578 Hz
FIDRES     0.157632 Hz
AQ         3.1720407 sec
RG         141.7
DW         48.400 usec
DE         6.00 usec
TE         295.8 K
D1         1.00000000 sec
TDO        1
NUC1      1H
P1         13.72 usec
PL1        1.00 dB
SFO1       500.1330885 MHz
SI         32768
SF         500.1300127 MHz
WDW        no
SSB        0
GB         0.00 Hz
PC         1.00
  
```

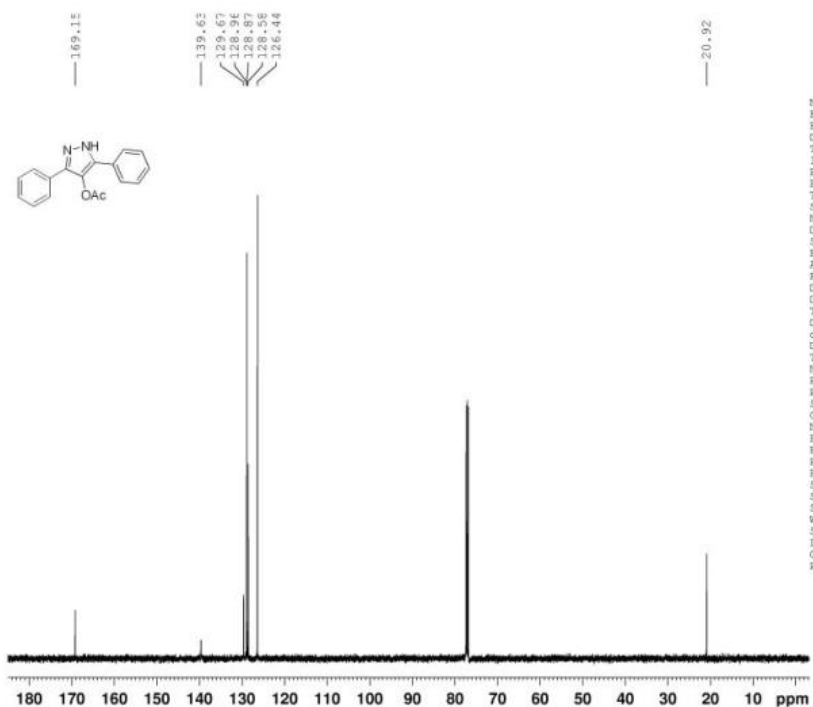

DZW-4-103  
C13CPD CDC13

```

NAME      XB20130510
EXPNO     9
PROCNO    1
Date_     20130510
Time      12.57
INSTRUM   spect
PROBHD    5 mm PATKO 19F
PULPROG   zgpg30
TD         65536
SOLVENT   CDC13
NS         128
DS         4
SWH        30030.029 Hz
FIDRES     0.458222 Hz
AQ         1.0912410 sec
RG         406.4
DW         16.650 usec
DE         6.00 usec
TE         297.1 K
D1         2.00000000 sec
d11        0.03000000 sec
DELTA      1.899999998 sec
TDO        1
NUC1      13C
P1         9.50 usec
PL1        -0.50 dB
SFO1       125.7703643 MHz
CPDPRG2   waltz16
NUC2      1H
PCPD2     80.00 usec
PL2        1.00 dB
PL12       16.31 dB
PL13       16.50 dB
SFO2       500.1320005 MHz
SI         32768
SF         125.7577781 MHz
WDW        EM
SSB        0
GB         1.00 Hz
PC         1.40
  
```

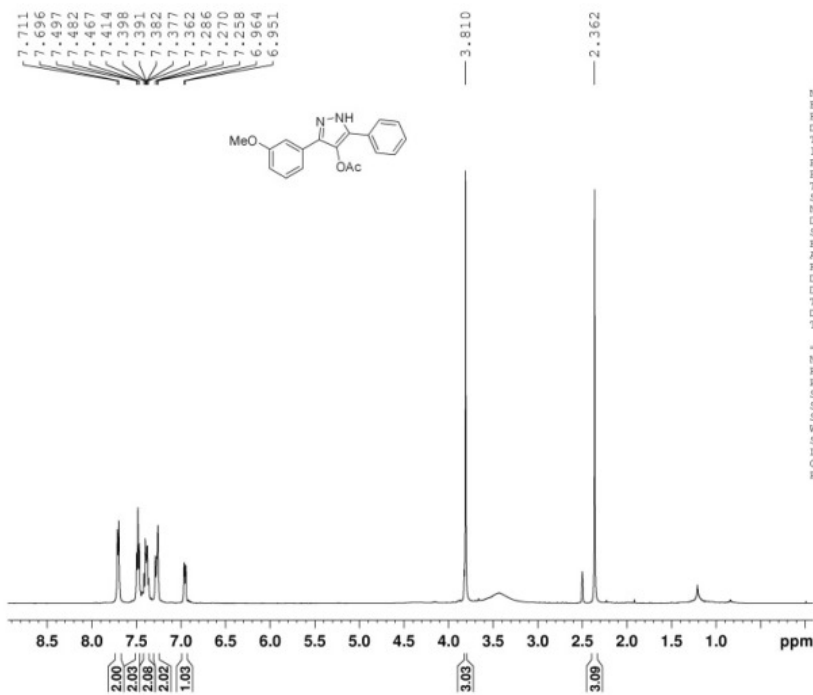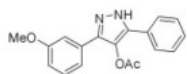

DZW-6-14  
PROTON DMSO

NAME XB20140627  
EXPNO 42  
PROCNO 1  
Date\_ 20140628  
Time 7.21  
INSTRUM spect  
PROBHD 5 mm PATXO 19F  
PULPROG zg30  
TD 65536  
SOLVENT DMSO  
NS 16  
DS 2  
SWH 10330.578 Hz  
FIDRES 0.157632 Hz  
AQ 3.1720407 sec  
RG 71.8  
DW 48.400 usec  
DE 6.00 usec  
TE 297.0 K  
D1 1.0000000 sec  
TDO 1

----- CHANNEL f1 -----  
NUC1 1H  
P1 14.14 usec  
PL1 1.00 dB  
SFO1 500.130885 MHz  
SI 32768  
SF 500.1300041 MHz  
WDM 0  
SSB 0  
LB 1.50 Hz  
GB 0  
PC 1.00

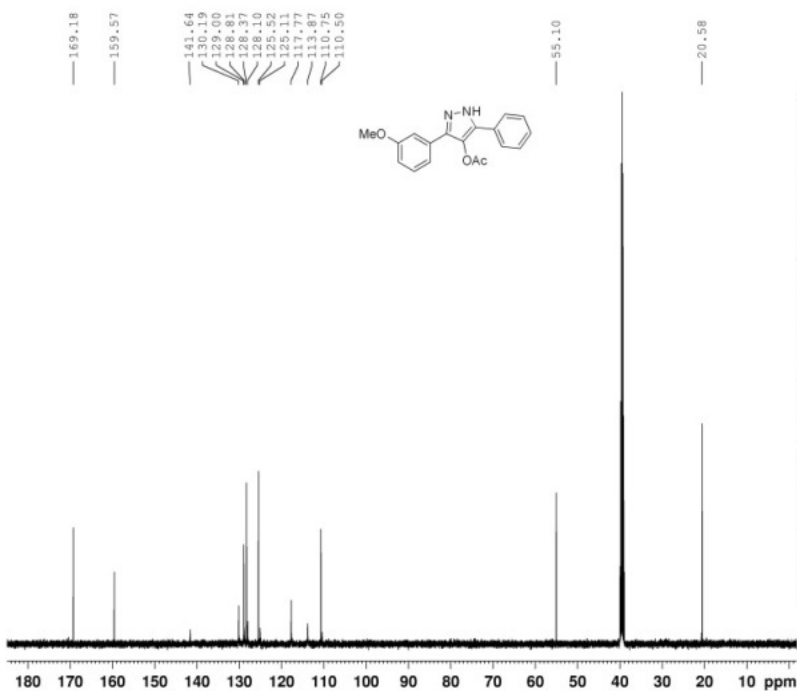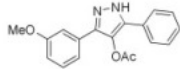

DZW-6-14  
C13CPD DMSO

NAME XB20140627  
EXPNO 43  
PROCNO 1  
Date\_ 20140628  
Time 7.50  
INSTRUM spect  
PROBHD 5 mm PATXO 19F  
PULPROG zgpg30  
TD 65536  
SOLVENT DMSO  
NS 512  
DS 4  
SWH 30030.029 Hz  
FIDRES 0.458222 Hz  
AQ 1.0912410 sec  
RG 456.1  
DW 16.650 usec  
DE 6.00 usec  
TE 298.2 K  
D1 2.0000000 sec  
d11 0.0300000 sec  
DELTA 1.89999998 sec  
TDO 1

----- CHANNEL f1 -----  
NUC1 13C  
P1 9.50 usec  
PL1 -0.50 dB  
SFO1 125.7703643 MHz

----- CHANNEL f2 -----  
CPDPRG2 waltz16  
NUC2 1H  
PCPD2 80.00 usec  
PL2 1.00 dB  
PL12 16.05 dB  
PL13 16.50 dB  
SFO2 500.1320005 MHz  
SI 32768  
SF 125.7578459 MHz  
WDM no  
SSB 0  
LB 0.00 Hz  
GB 0  
PC 1.40

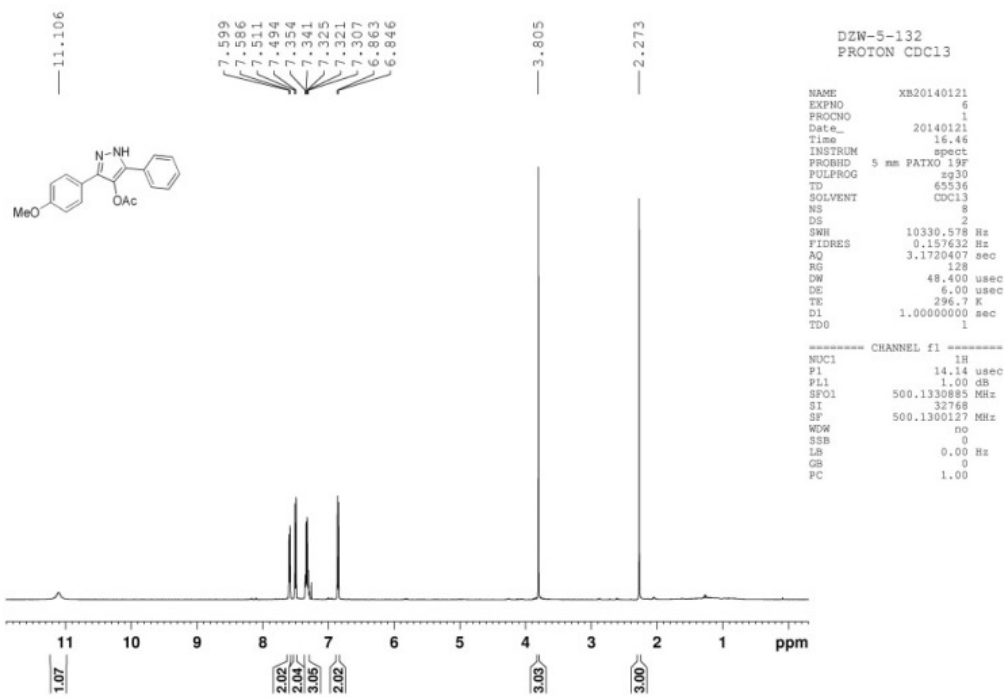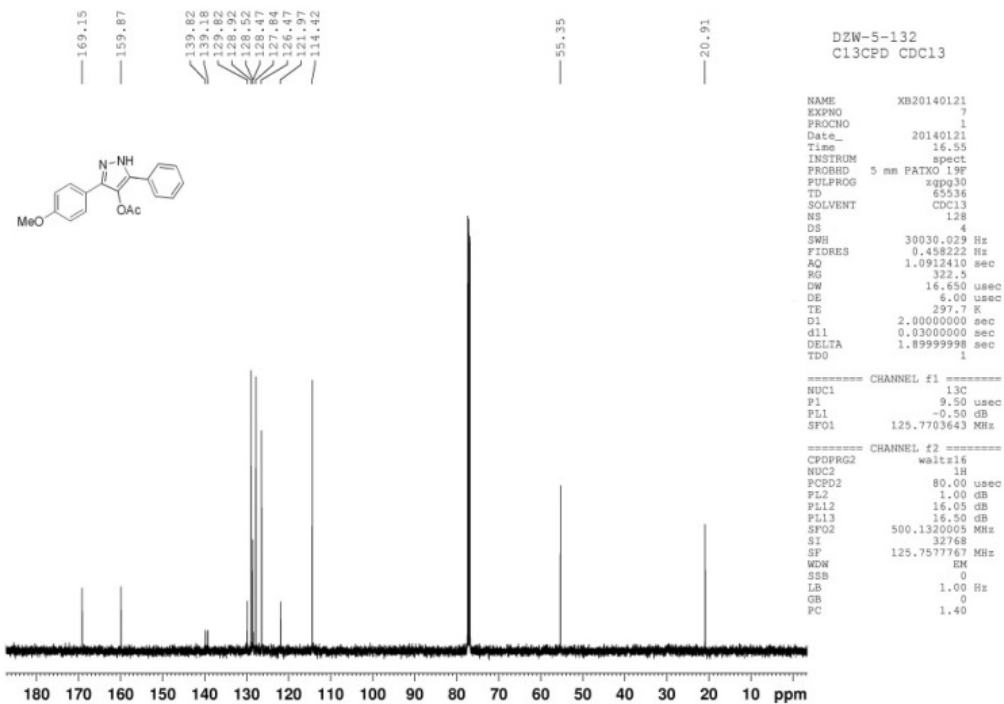

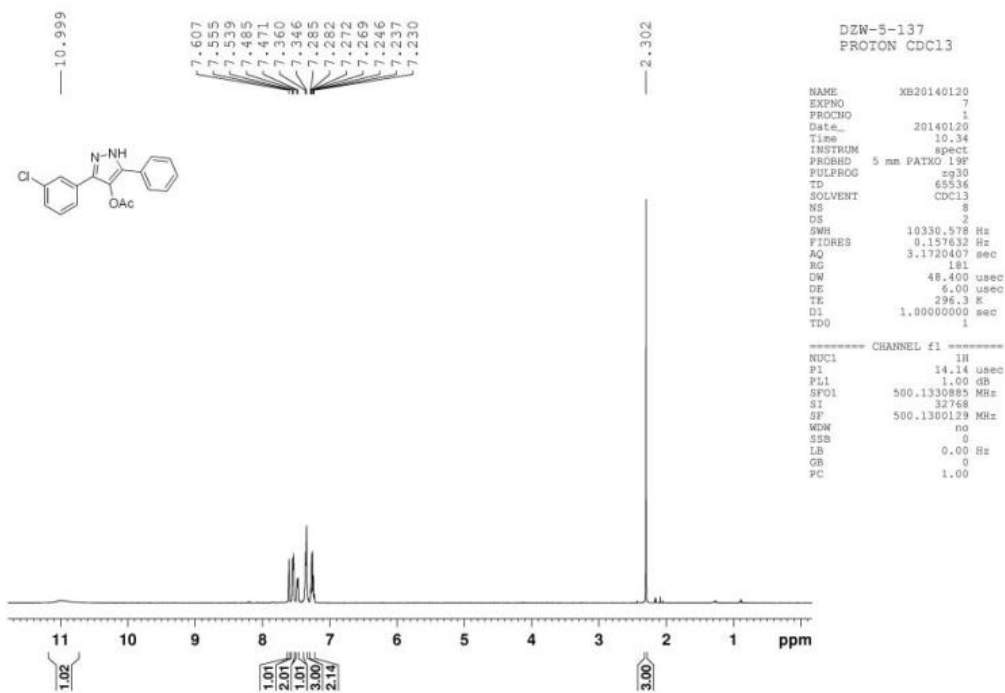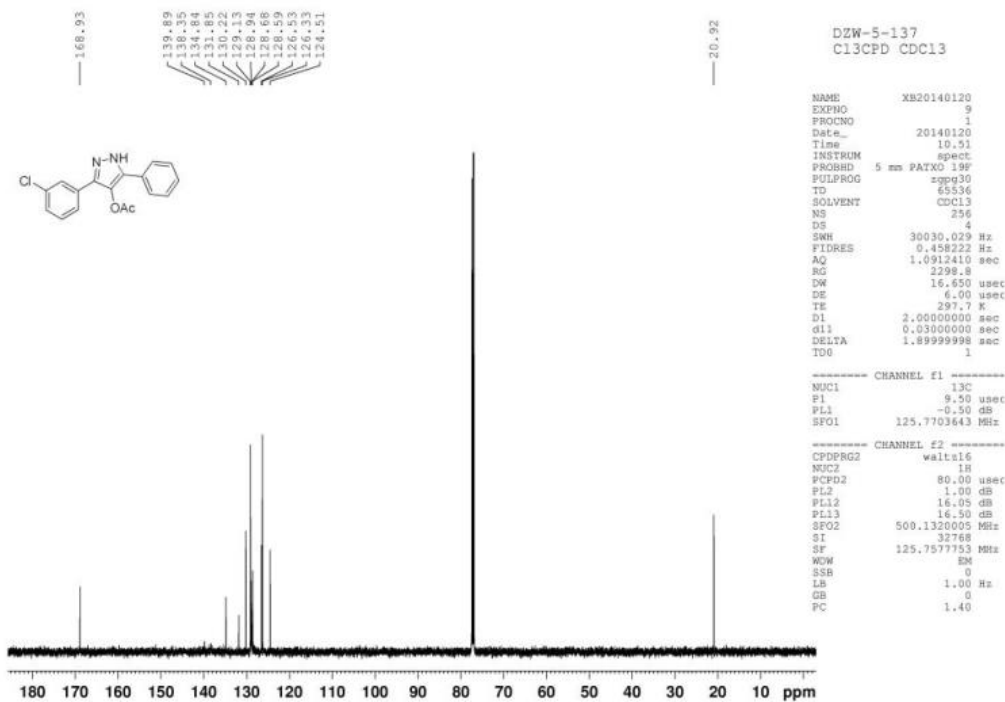

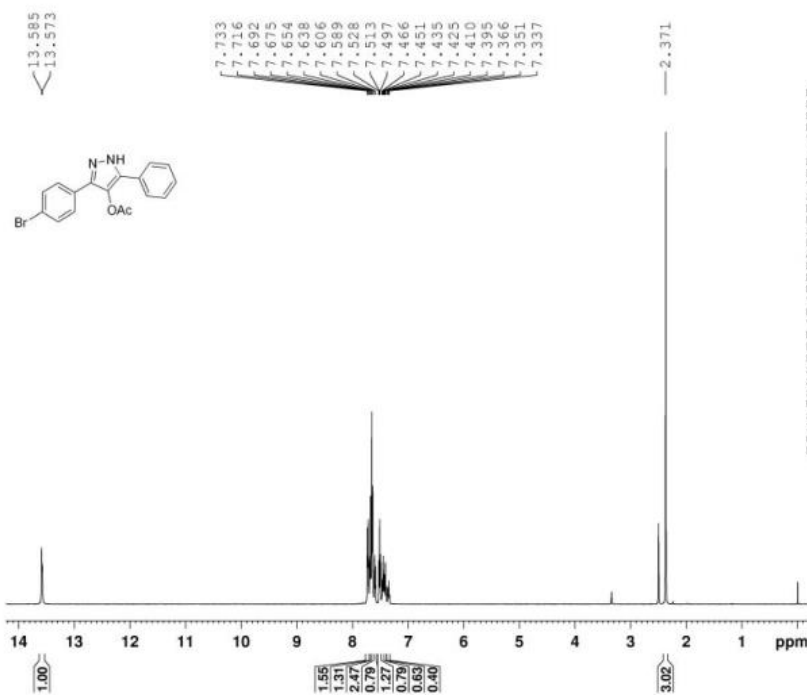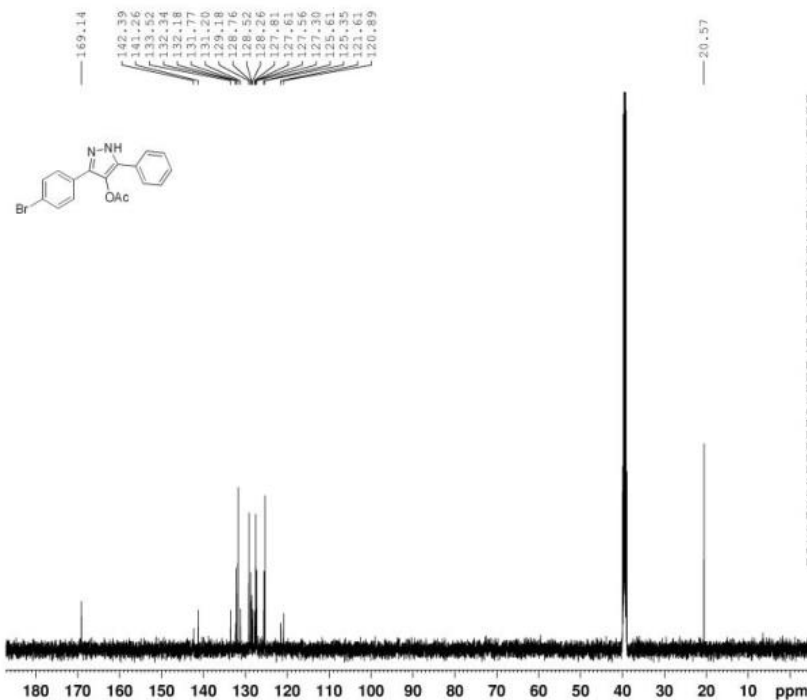

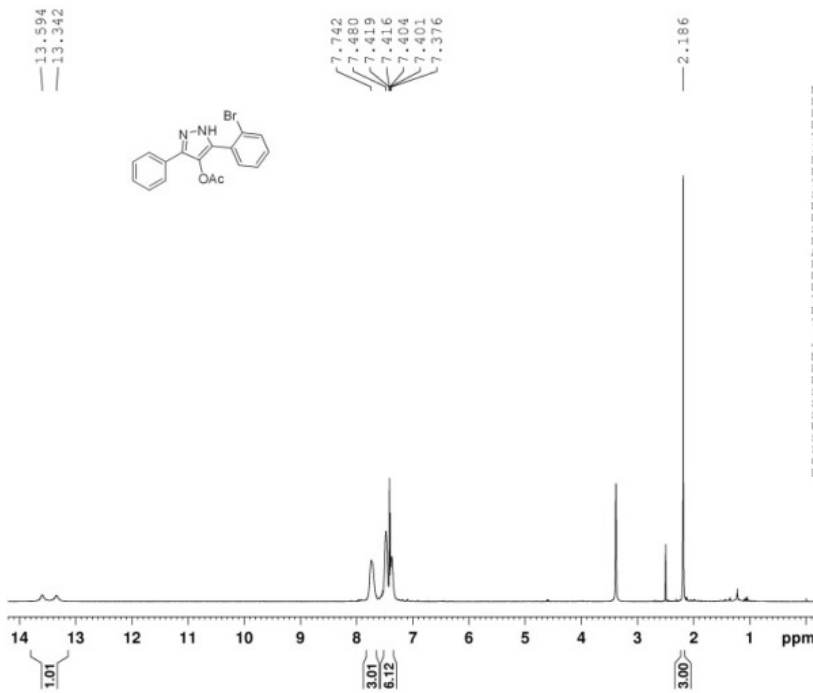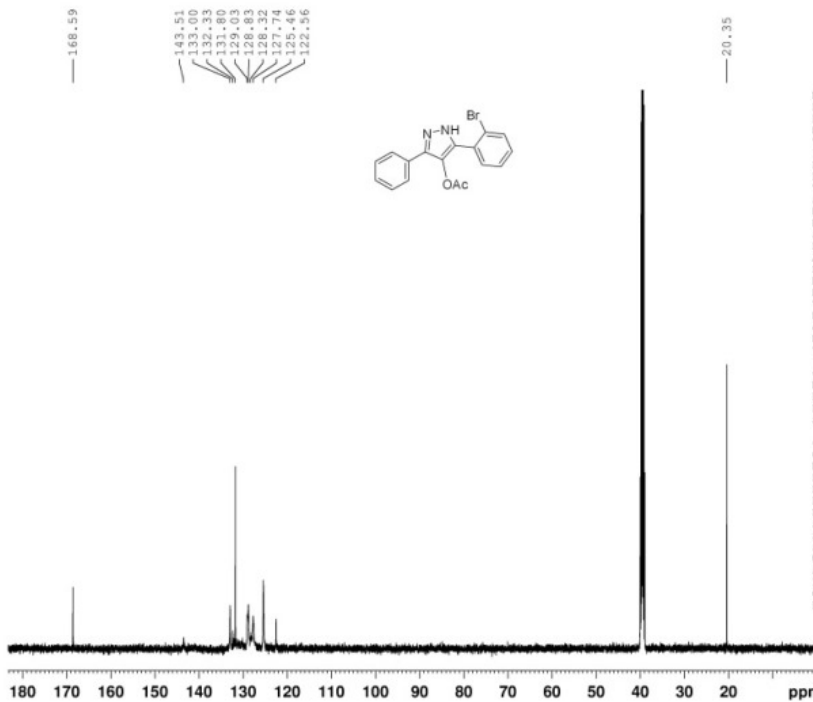

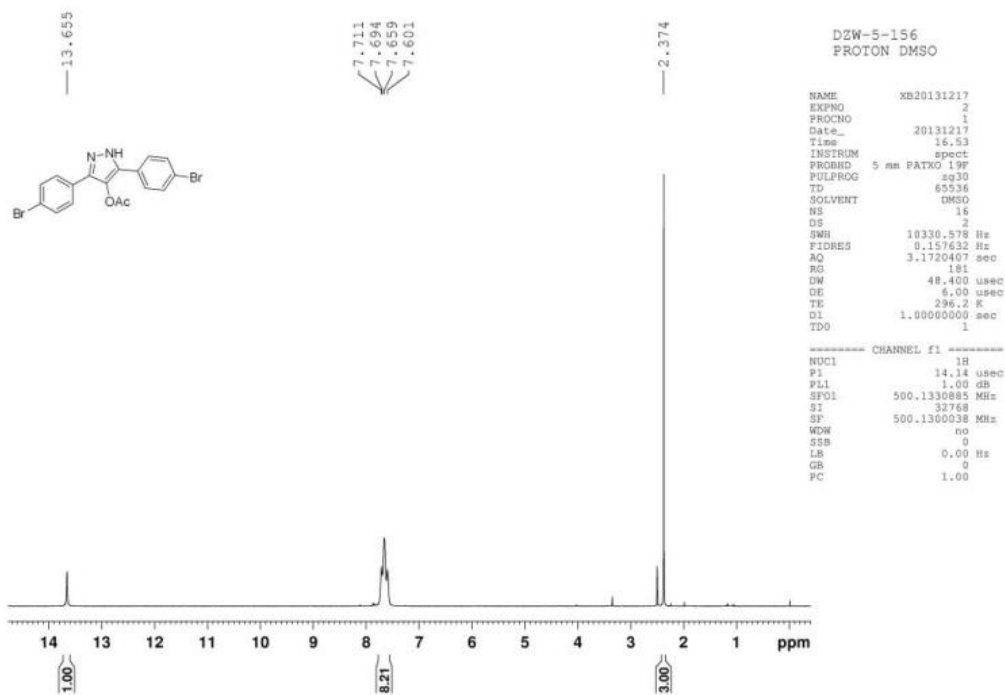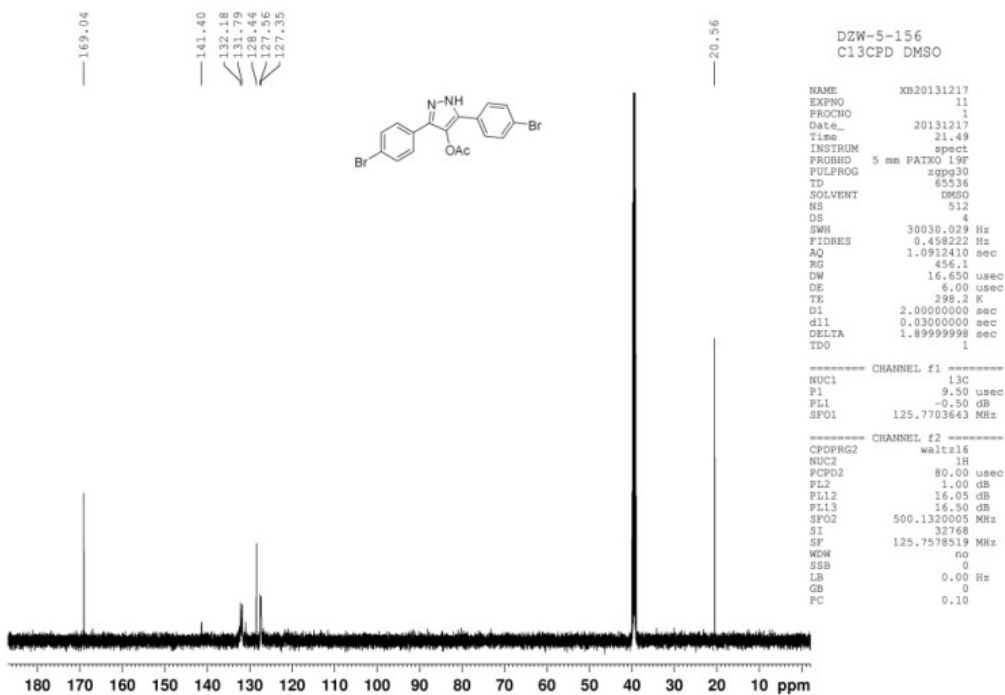



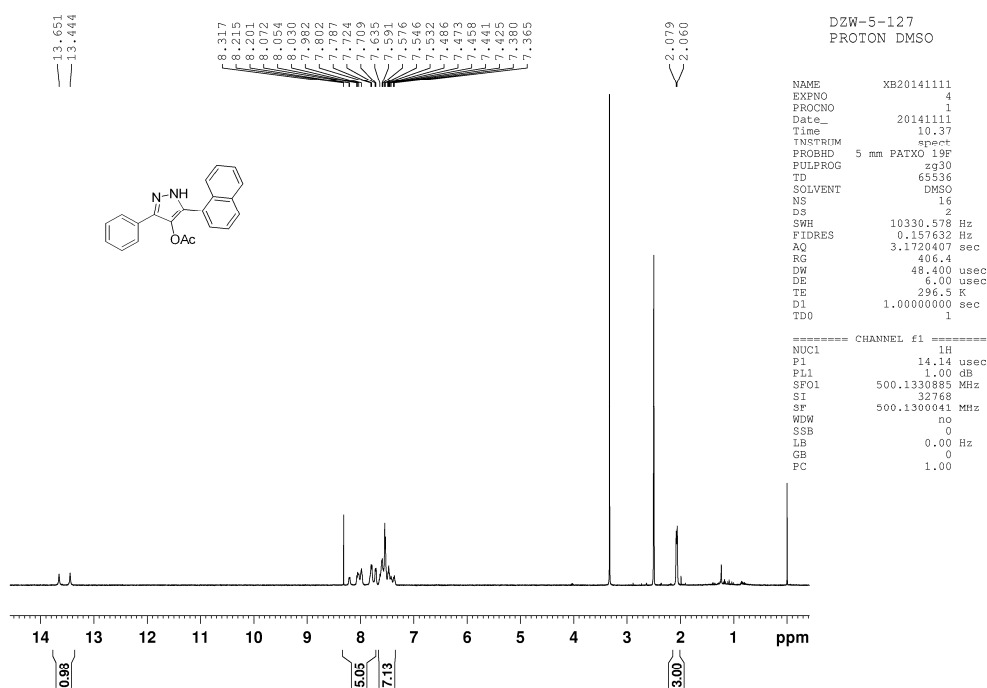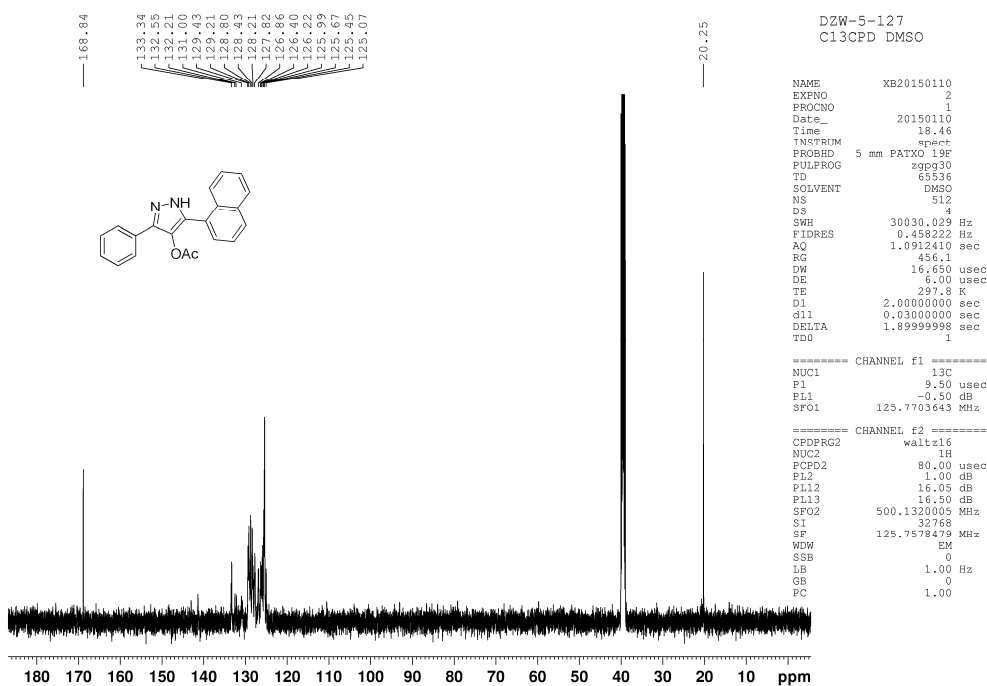

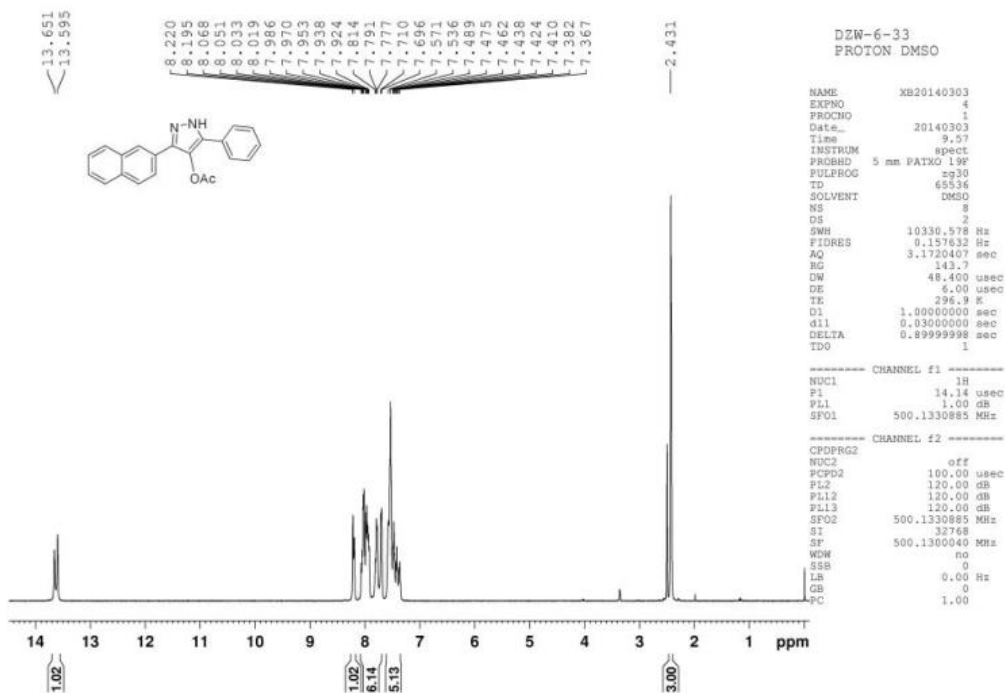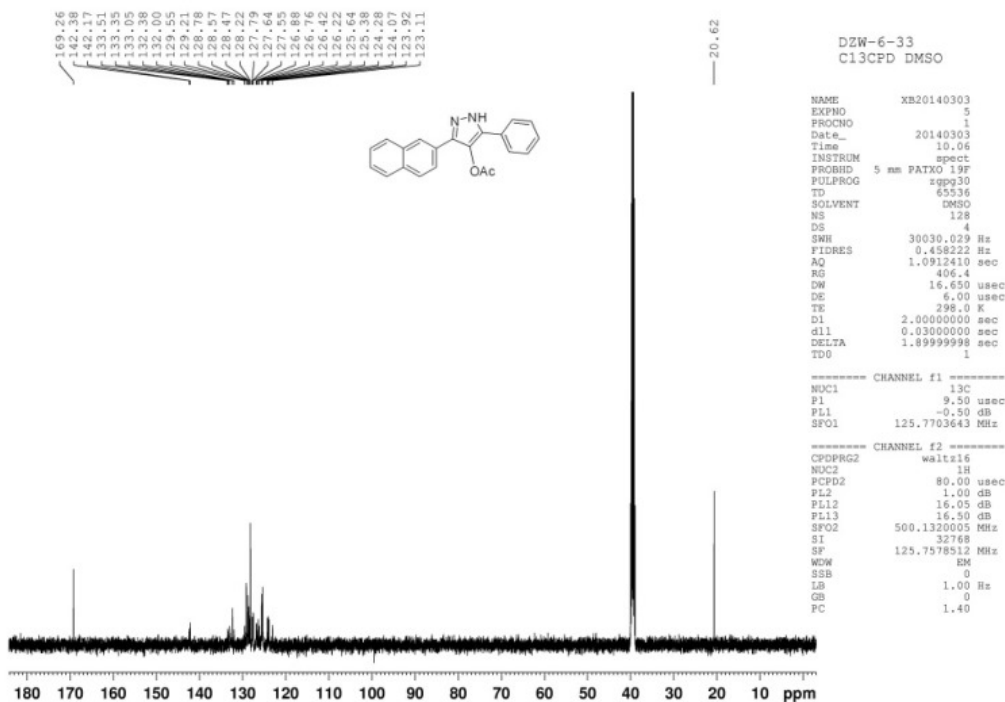

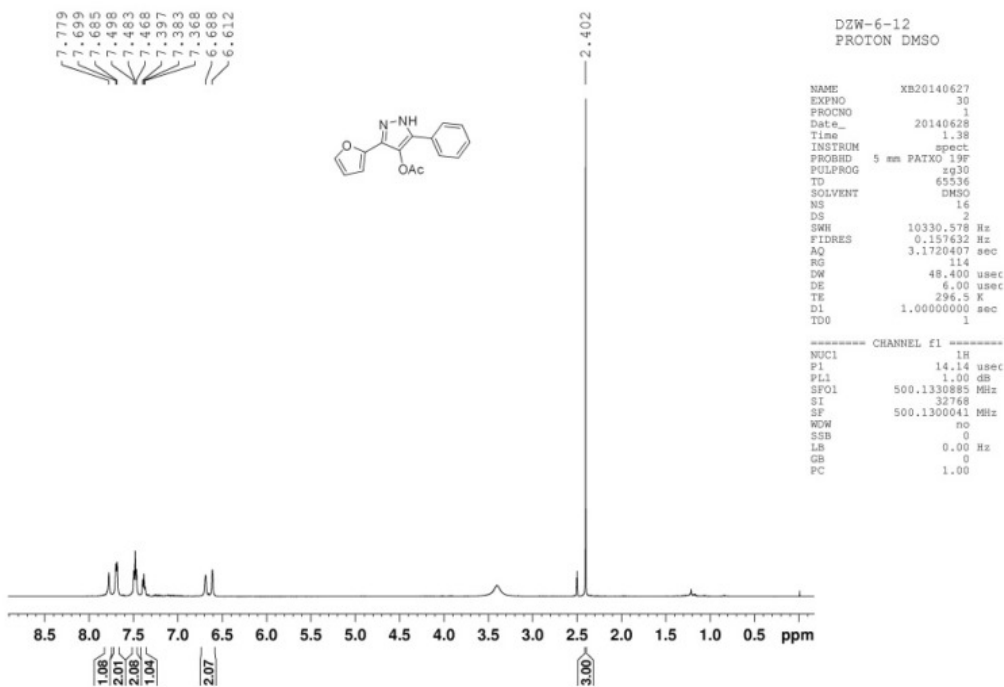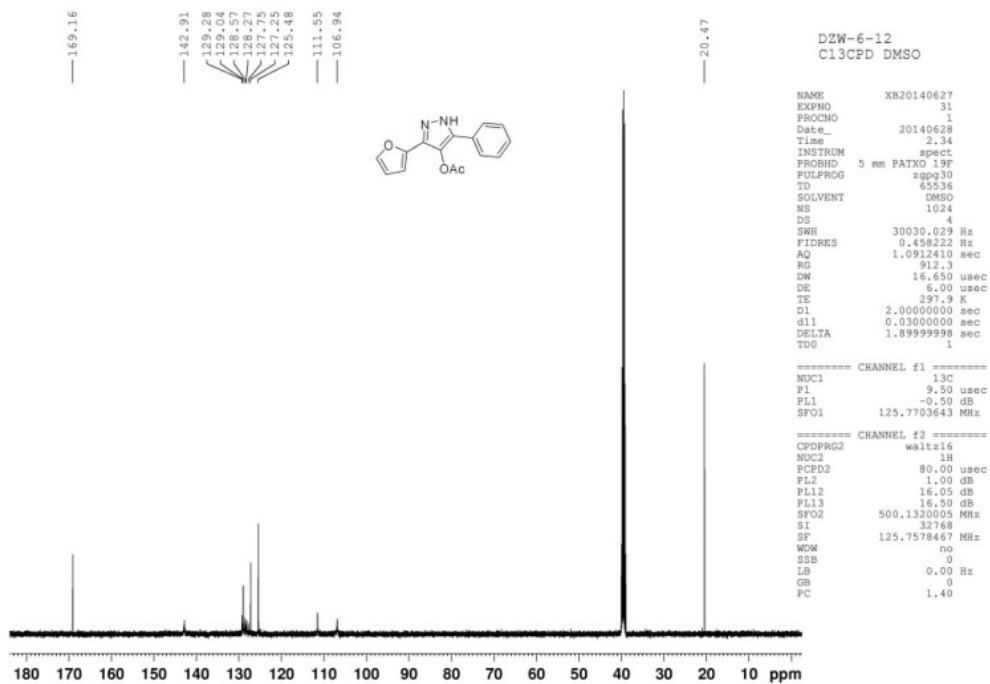

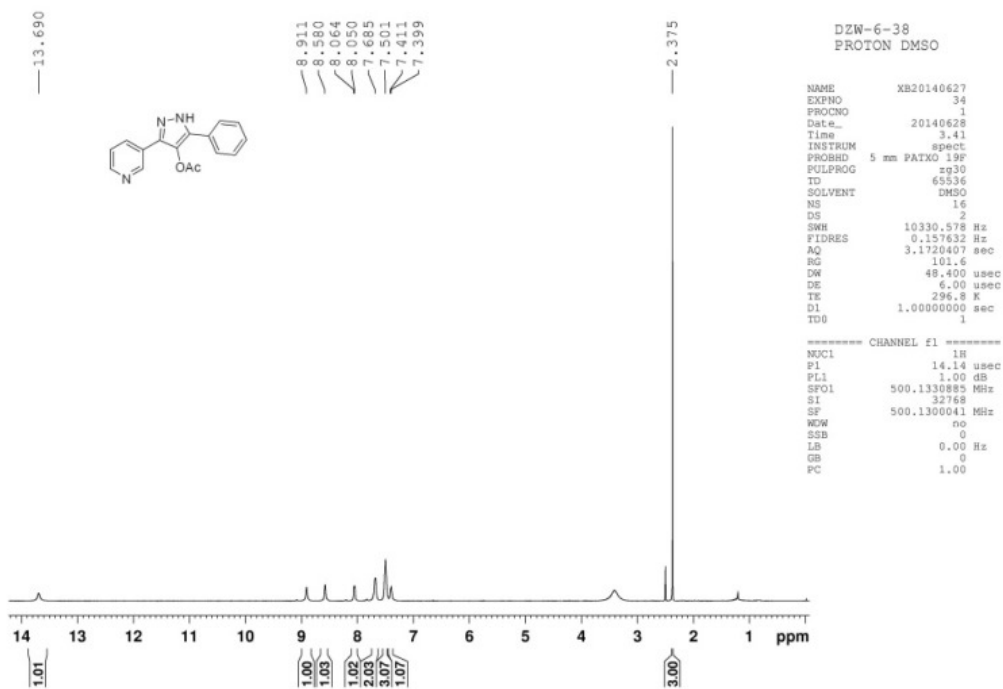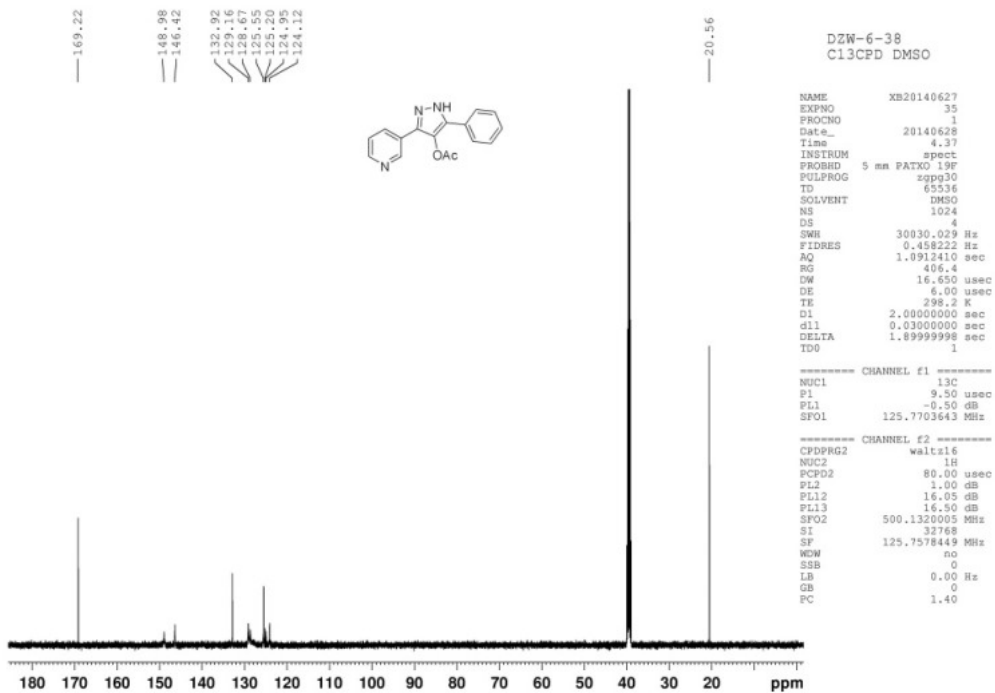

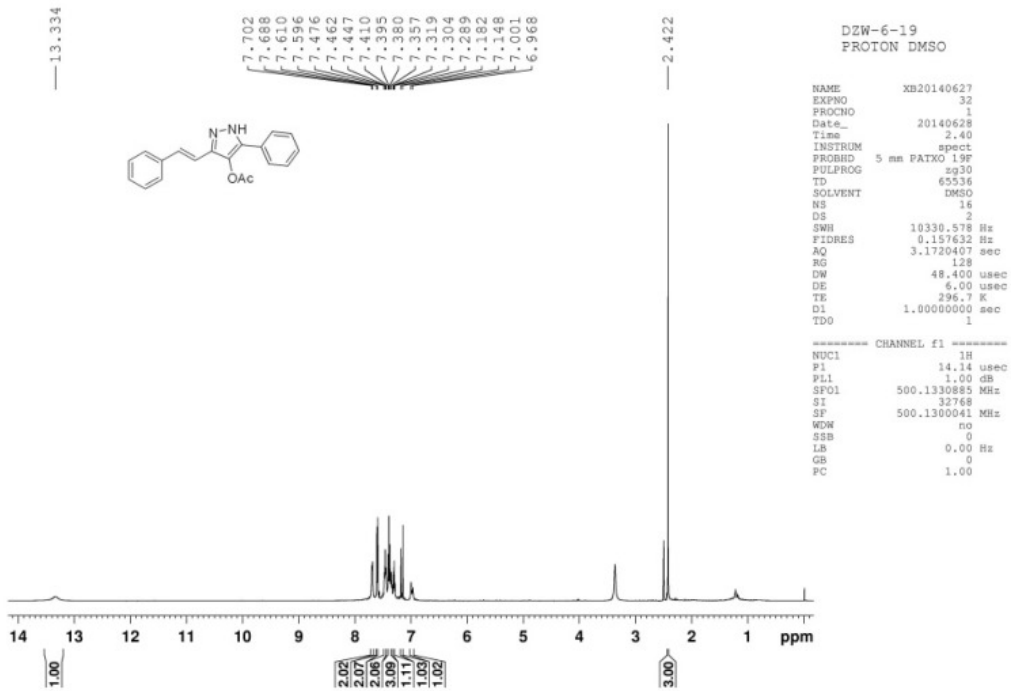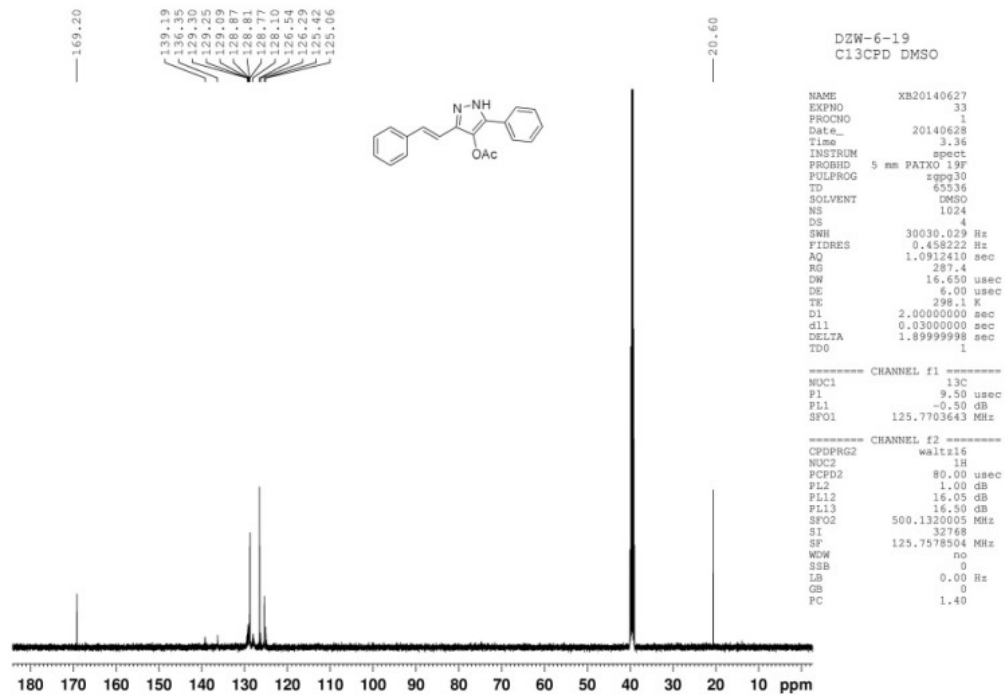

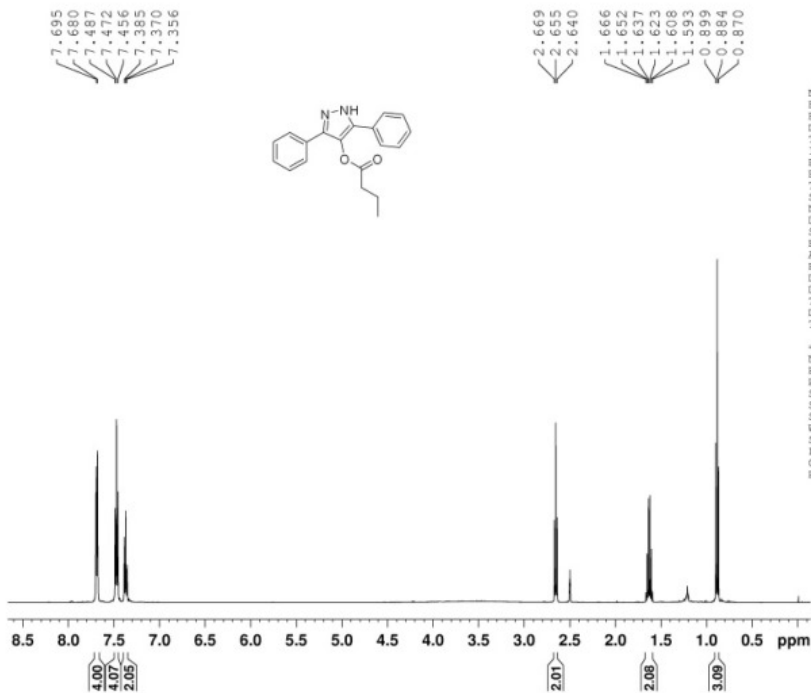

DZW-5-157  
PROTON DMSO

```

NAME      XB20140627
EXPNO     28
PROCNO    1
Date_     20140628
Time      0.36
INSTRUM   spect
PROBHD    5 mm PATKO 19F
PULPROG   zg30
TD         65536
SOLVENT   DMSO
NS         16
DS         2
SWH        10330.578 Hz
FIDRES     0.157632 Hz
AQ         3.1720407 sec
RG         90.5
DW         48.400 usec
DE         6.00 usec
TE         296.1 K
D1         1.00000000 sec
TD0        1

----- CHANNEL f1 -----
NUC1       1H
P1         14.14 usec
PL1        1.00 dB
SFO1       500.1300885 MHz
SI         32768
SF         500.1300042 MHz
WDW        no
SSB        0
LB         0.00 Hz
GB         0
PC         1.00

```

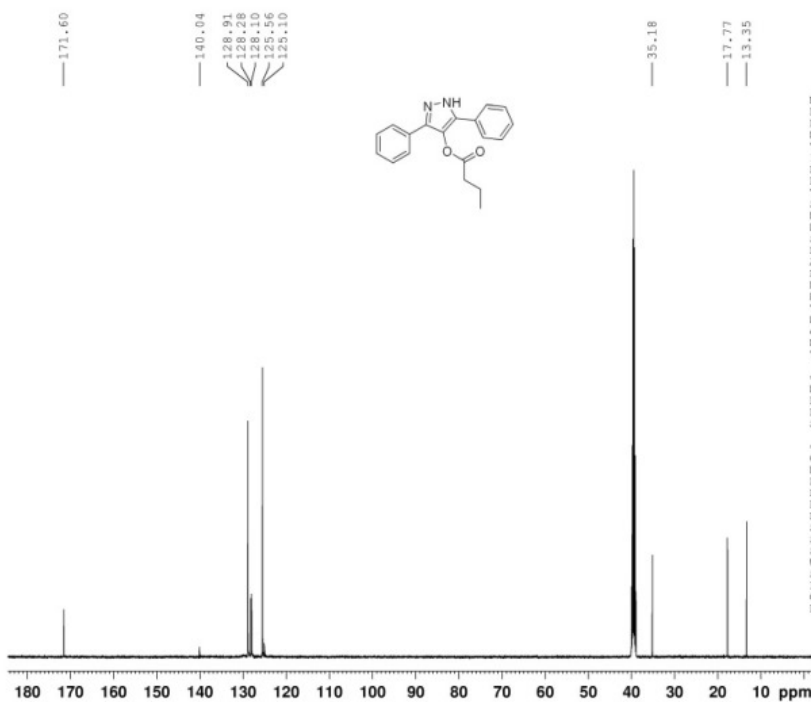

DZW-5-157  
C13CPD DMSO

```

NAME      XB20140627
EXPNO     29
PROCNO    1
Date_     20140628
Time      1.32
INSTRUM   spect
PROBHD    5 mm PATKO 19F
PULPROG   zgpg30
TD         65536
SOLVENT   DMSO
NS         1024
DS         4
SWH        30030.029 Hz
FIDRES     0.458222 Hz
AQ         1.0912410 sec
RG         287.4
DW         16.650 usec
DE         6.00 usec
TE         297.7 K
D1         2.00000000 sec
d11        0.03000000 sec
DELTA     1.89999998 sec
TD0        1

----- CHANNEL f1 -----
NUC1       13C
P1         9.50 usec
PL1        -0.50 dB
SFO1       125.7703643 MHz

----- CHANNEL f2 -----
CPDPRG2   waltz16
NUC2       1H
PCPD2     80.00 usec
PL2        1.00 dB
PL12       16.05 dB
PL13       16.50 dB
SFO2       500.1320005 MHz
SI         32768
SF         125.7578477 MHz
WDW        EM
SSB        0
LB         1.00 Hz
GB         0
PC         1.40

```

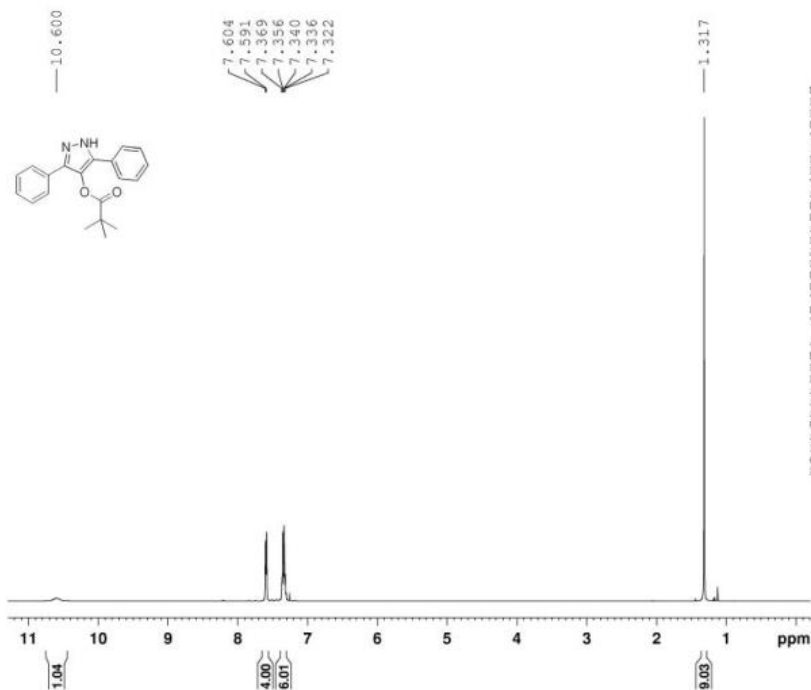

DZW-5-140  
PROTON CDCl3

```

NAME      XB20140120
EXPNO     1
PROCNO    1
Date_     20140120
Time      10.57
INSTRUM   spect
PROBHD    5 mm PATXO 19F
PULPROG   zg30
TD         65536
SOLVENT   CDCl3
NS         16
DS         2
SWH       10330.578 Hz
FIDRES    0.157632 Hz
AQ         3.1750407 sec
RG         143.7
DW         48.400 usec
DE         6.00 usec
TE         296.6 K
D1         1.00000000 sec
TDO        1
  
```

```

----- CHANNEL f1 -----
NUC1      1H
P1        14.14 usec
PL1       1.00 dB
SFO1      500.1330885 MHz
SI        32768
SF        500.1300126 MHz
WDW       no
SSB       0
LB        0.00 Hz
GB        0
PC        1.00
  
```

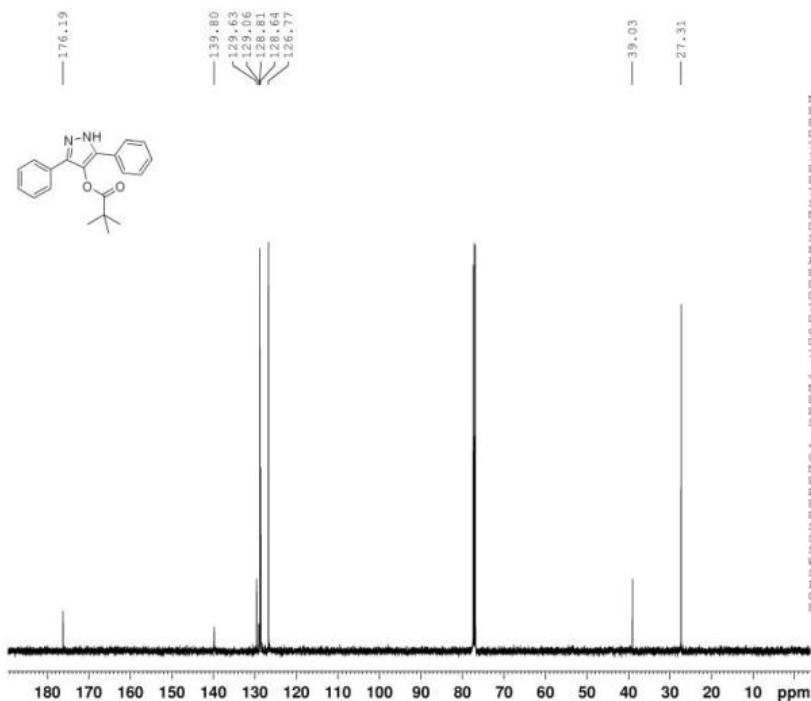

DZW-5-140  
C13CPD CDCl3

```

NAME      XB20140120
EXPNO     11
PROCNO    1
Date_     20140120
Time      11.13
INSTRUM   spect
PROBHD    5 mm PATXO 19F
PULPROG   zgpg30
TD         65536
SOLVENT   CDCl3
NS         256
DS         4
SWH       30030.029 Hz
FIDRES    0.458222 Hz
AQ         1.0912410 sec
RG         143.7
DW         16.650 usec
DE         6.00 usec
TE         297.9 K
D1         2.00000000 sec
d11       0.03000000 sec
DELTA     1.89999998 sec
TDO        1
  
```

```

----- CHANNEL f1 -----
NUC1      13C
P1        9.50 usec
PL1       -0.50 dB
SFO1      125.7703643 MHz
  
```

```

----- CHANNEL f2 -----
CPDPRG2   waltz16
NUC2      1H
PCPD2     80.00 usec
PL2       1.00 dB
PL12      16.05 dB
PL13      16.50 dB
SFO2      500.1320005 MHz
SI        32768
SF        125.7577754 MHz
WCH       HM
SSB       0
LB        1.00 Hz
GB        0
PC        1.40
  
```

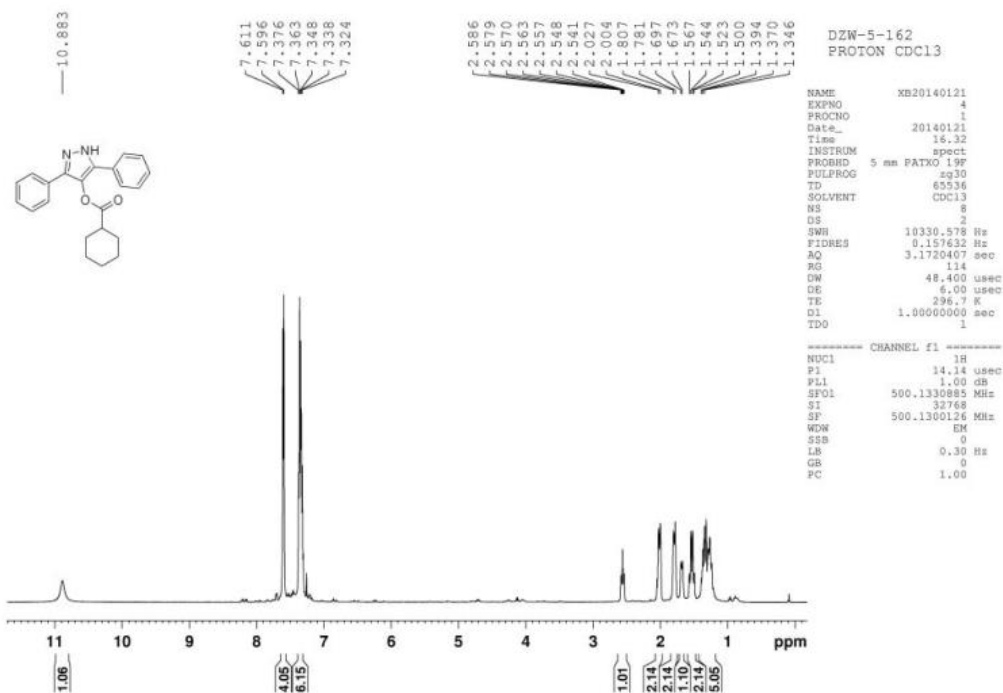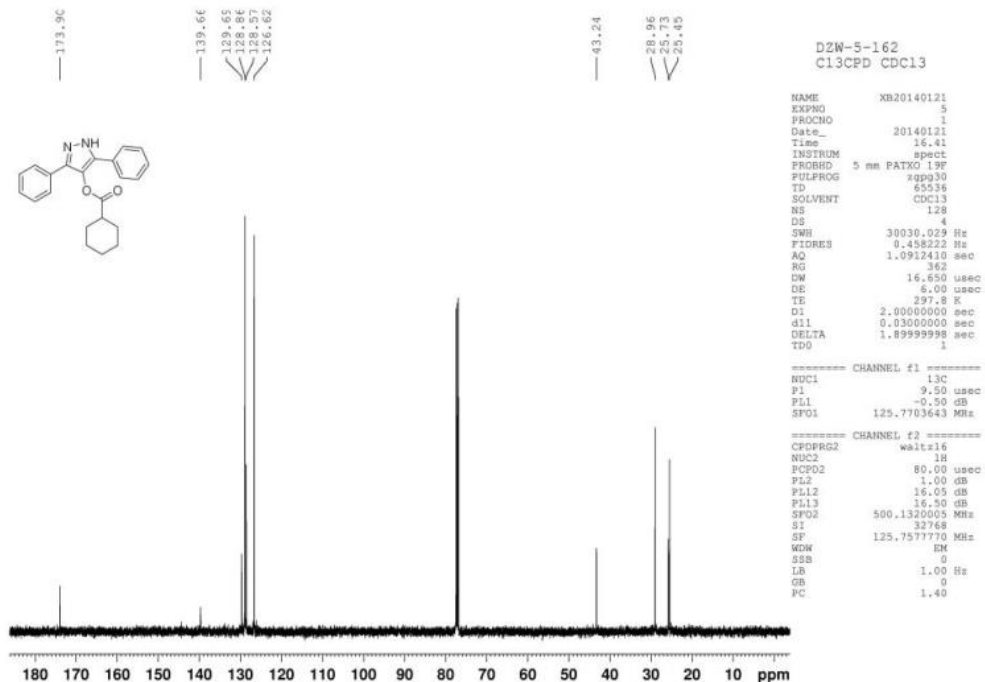



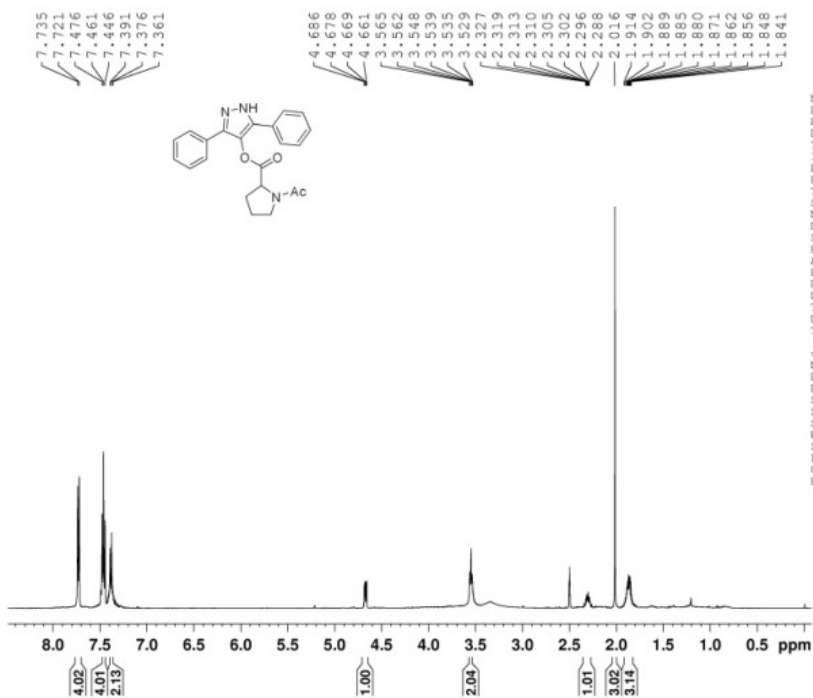

DZW-6-21  
PROTON DMSO

NAME XB20140627  
EXPNO 40  
PROCNO 1  
Date\_ 20140628  
Time 6.47  
INSTRUM spect  
PROBHD 5 mm PATXO 19F  
PULPROG zg30  
TD 65536  
SOLVENT DMSO  
NS 16  
DS 2  
SWH 10330.578 Hz  
FIDRES 0.157632 Hz  
AQ 3.1720407 sec  
RG 71.8  
DW 48.400 usec  
DE 6.00 usec  
TE 296.9 K  
D1 1.0000000 sec  
TD0 1

===== CHANNEL f1 =====  
NUC1 1H  
P1 14.14 usec  
PL1 1.00 dB  
SFO1 500.1330885 MHz  
SI 32768  
SF 500.1300041 MHz  
WDW no  
SSB 0  
LB 0.00 Hz  
GB 0  
PC 1.00

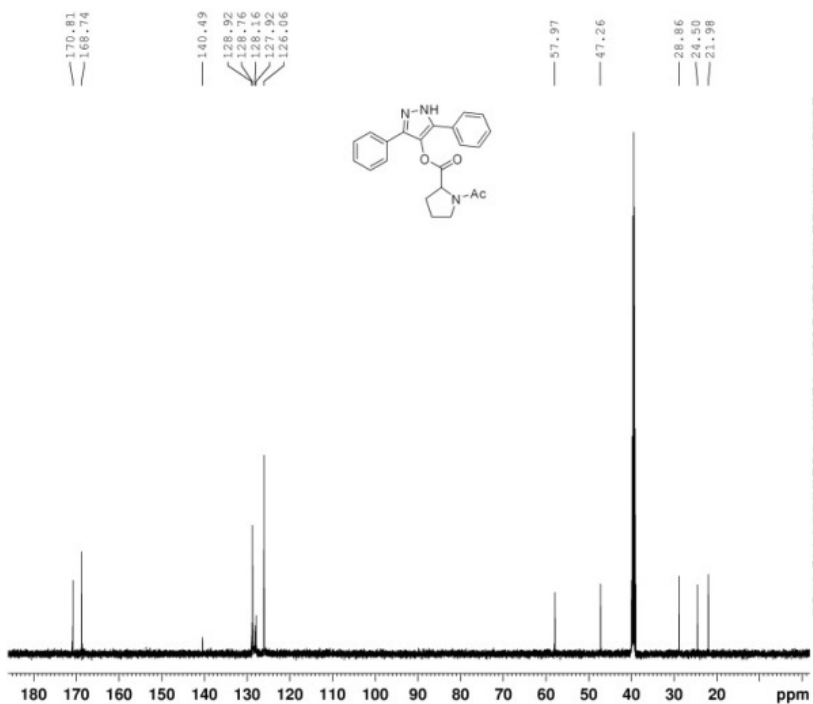

DZW-6-21  
C13CPD DMSO

NAME XB20140627  
EXPNO 41  
PROCNO 1  
Date\_ 20140628  
Time 7.15  
INSTRUM spect  
PROBHD 5 mm PATXO 19F  
PULPROG zgpg30  
TD 65536  
SOLVENT DMSO  
NS 512  
DS 4  
SWH 30030.029 Hz  
FIDRES 0.458222 Hz  
AQ 1.0912410 sec  
RG 203.2  
DW 16.650 usec  
DE 6.00 usec  
TE 298.2 K  
D1 2.0000000 sec  
d11 0.0300000 sec  
DELTA 1.8999998 sec  
TD0 1

===== CHANNEL f1 =====  
NUC1 13C  
P1 9.50 usec  
PL1 -0.50 dB  
SFO1 125.7703643 MHz

===== CHANNEL f2 =====  
CPDPRG2 waltz16  
NUC2 1H  
PCPD2 80.00 usec  
PL2 1.00 dB  
PL12 16.05 dB  
PL13 16.50 dB  
SFO2 500.1320005 MHz  
SI 32768  
SF 125.7578466 MHz  
WDW no  
SSB 0  
LB 0.00 Hz  
GB 0  
PC 1.40

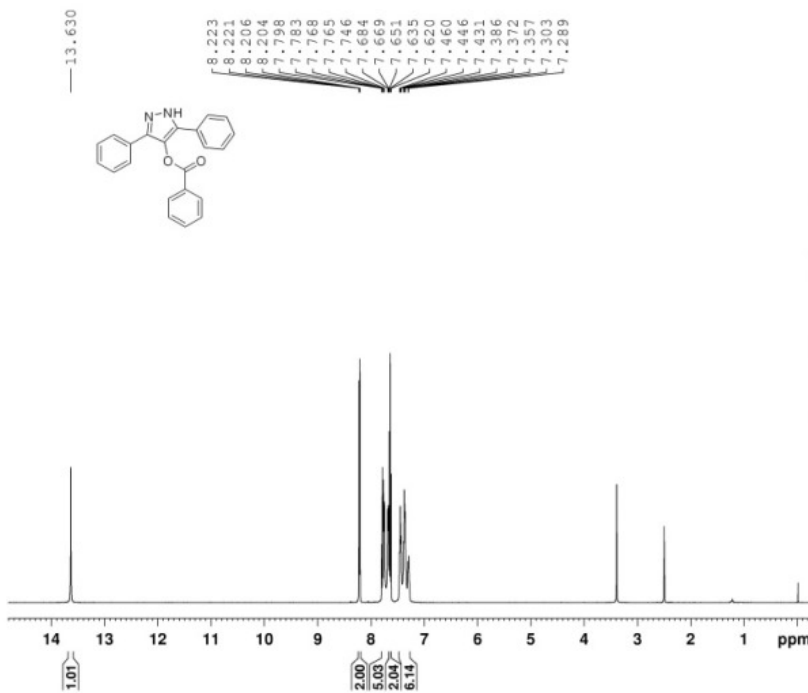

DZW-4-117  
PROTON DMSO

```

NAME      XB20140627
EXPNO    21
PROCNO    1
Date_     20140627
Time      23.24
INSTRUM   spect
PROBHD    5 mm PATXO 19F
PULPROG   zg30
TD         65536
SOLVENT   DMSO
NS         16
DS         2
SWH        10330.578 Hz
FIDRES     0.157632 Hz
AQ         3.1720407 sec
RG         114
DW         48.400 usec
DE         6.00 usec
TE         296.0 K
D1         1.0000000 sec
TD0        1
  
```

```

----- CHANNEL f1 -----
NUC1      1H
P1         14.14 usec
PL1        1.00 dB
SFO1      500.130885 MHz
SI         32768
SF         500.1300040 MHz
WDW        no
SSB         0
LB         0.00 Hz
GB         0
PC         1.00
  
```

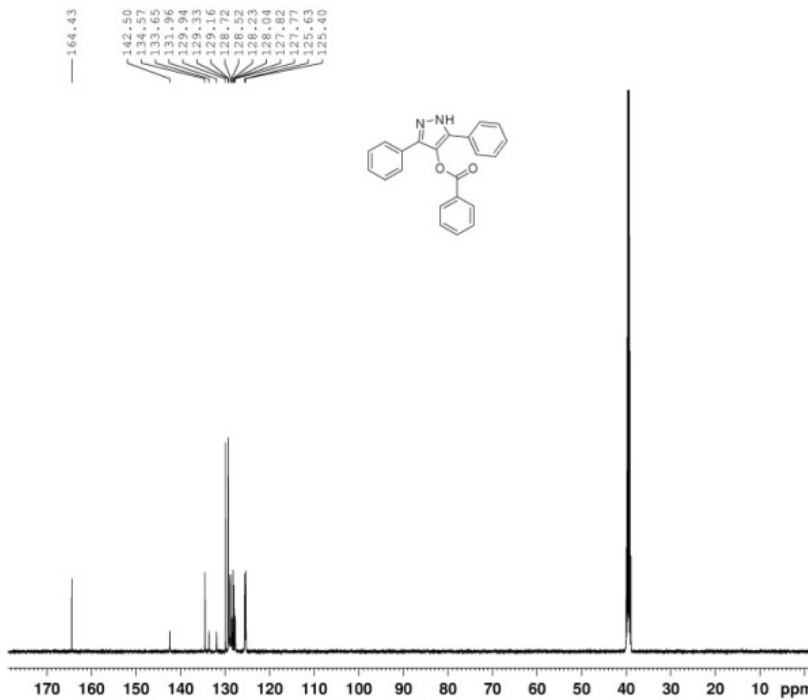

DZW-4-117  
C13CPD DMSO

```

NAME      XB20140627
EXPNO    23
PROCNO    1
Date_     20140628
Time      0.22
INSTRUM   spect
PROBHD    5 mm PATXO 19F
PULPROG   zgpg30
TD         65536
SOLVENT   DMSO
NS         1024
DS         4
SWH        30030.029 Hz
FIDRES     0.458222 Hz
AQ         1.0912410 sec
RG         1448.2
DW         16.550 usec
DE         6.00 usec
TE         297.6 K
D1         2.0000000 sec
d11        0.0300000 sec
DELTA      1.89999998 sec
TD0        1
  
```

```

----- CHANNEL f1 -----
NUC1      13C
P1         9.50 usec
PL1        -0.50 dB
SFO1      125.7703643 MHz
  
```

```

----- CHANNEL f2 -----
CPDPRG2   waltz16
NUC2      1H
PCPD2     80.00 usec
PL2        1.00 dB
PL12       16.05 dB
PL13       16.50 dB
SFO2      500.1320005 MHz
SI         32768
SF         125.7578495 MHz
WDW        EM
SSB         0
LB         1.00 Hz
GB         0
PC         1.40
  
```

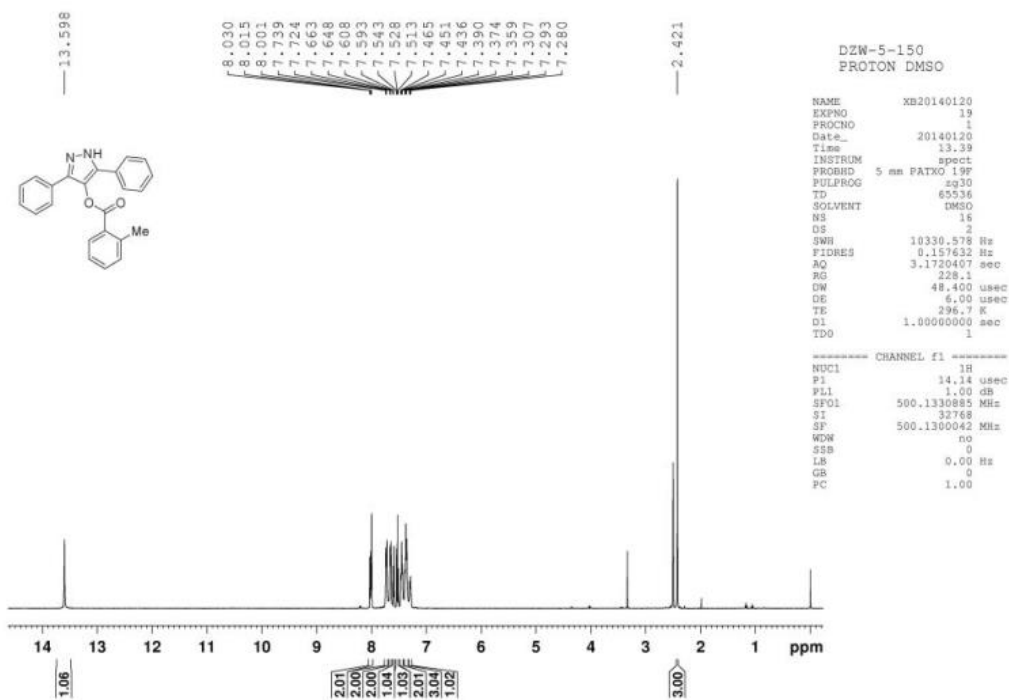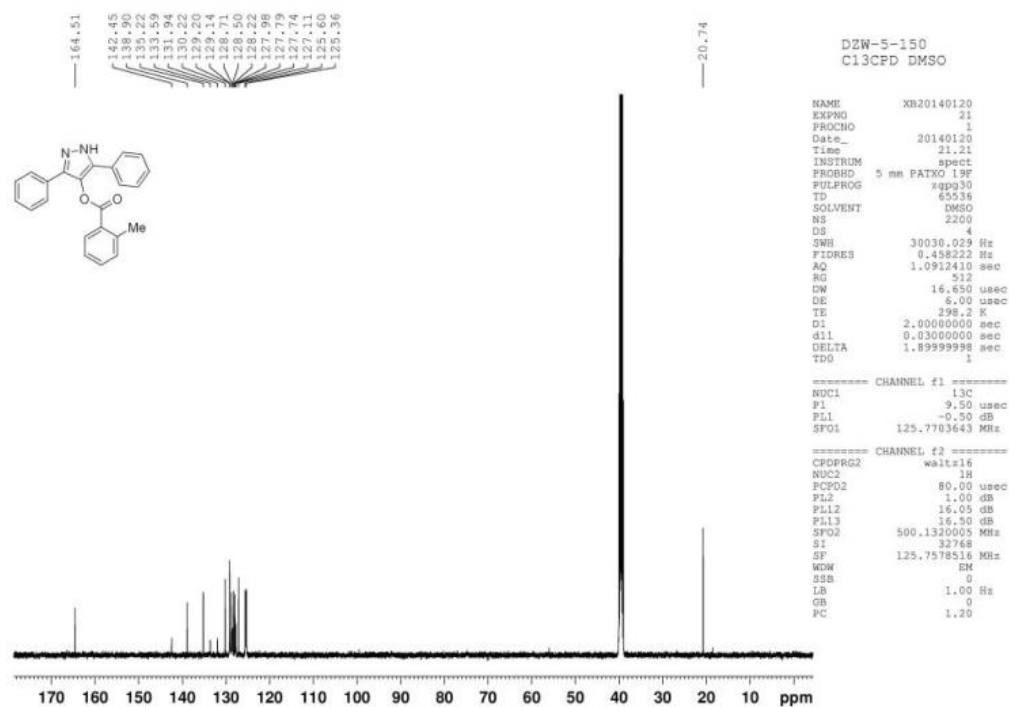

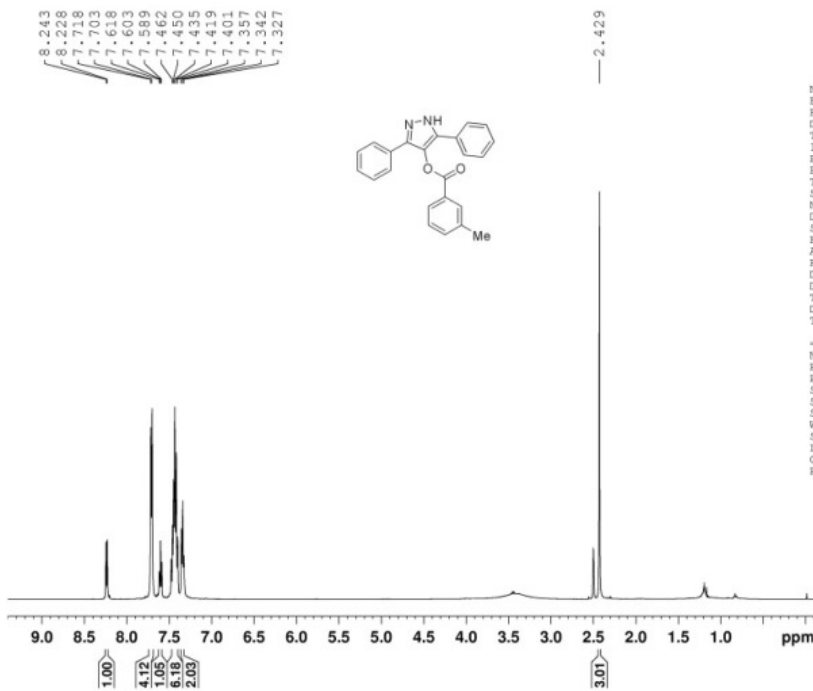

DZW-5-149  
PROTON DMSO

NAME XB20140627  
EXPNO 26  
PROCNO 1  
Date\_ 20140628  
Time 7.54  
INSTRUM spect  
PROBHD 5 mm PATXO 19F  
PULPROG zg30  
TD 65536  
SOLVENT DMSO  
NS 16  
DS 2  
SWH 10330.578 Hz  
FIDRES 0.157632 Hz  
AQ 3.1720407 sec  
RG 114  
DW 48.400 usec  
DE 6.00 usec  
TE 296.3 K  
D1 1.0000000 sec  
TDO 1

----- CHANNEL f1 -----  
NUC1 1H  
P1 14.14 usec  
PL1 1.00 dB  
SFO1 500.130888 MHz  
SI 32768  
SF 500.1300041 MHz  
WDM EM  
SSB 0  
LB 1.00 Hz  
GB 0  
PC 1.00

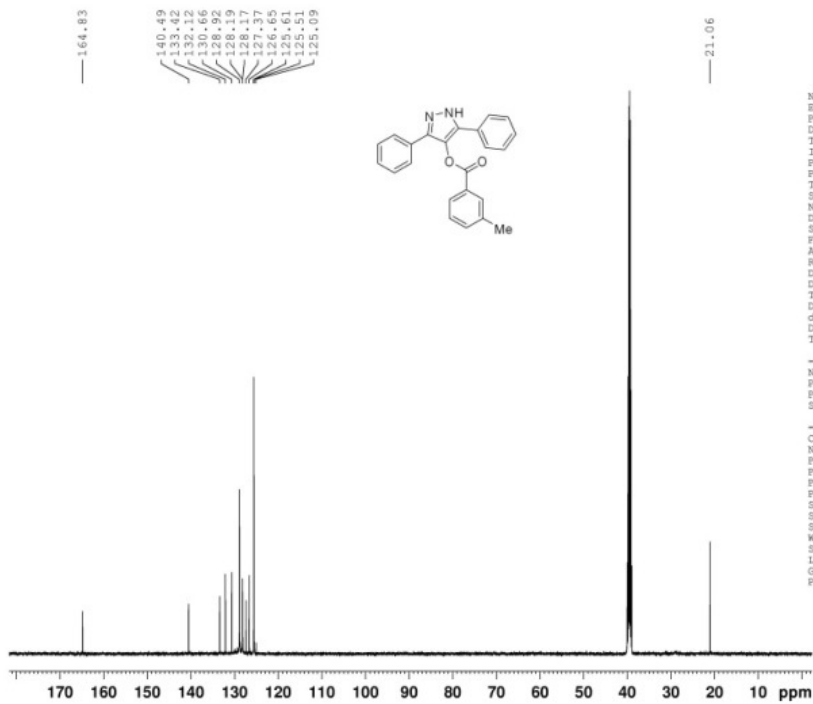

DZW-5-149  
13CPD DMSO

NAME XB20140627  
EXPNO 27  
PROCNO 1  
Date\_ 20140628  
Time 8.52  
INSTRUM spect  
PROBHD 5 mm PATXO 19F  
PULPROG zgpg30  
TD 65536  
SOLVENT DMSO  
NS 1024  
DS 4  
SWH 30030.029 Hz  
FIDRES 0.458222 Hz  
AQ 1.0912410 sec  
RG 512  
DW 16.650 usec  
DE 6.00 usec  
TE 298.0 K  
D1 2.0000000 sec  
d11 0.0300000 sec  
DELTA 1.8999998 sec  
TDO 1

----- CHANNEL f1 -----  
NUC1 13C  
P1 9.50 usec  
PL1 -0.50 dB  
SFO1 125.7703643 MHz

----- CHANNEL f2 -----  
CPDPRG2 waltz16  
NUC2 1H  
PCPD2 80.00 usec  
PL2 1.00 dB  
PL12 16.05 dB  
PL13 16.30 dB  
SFO2 500.1320000 MHz  
SI 32768  
SF 125.7578496 MHz  
WDM EM  
SSB 0  
LB 1.00 Hz  
GB 0  
PC 1.40

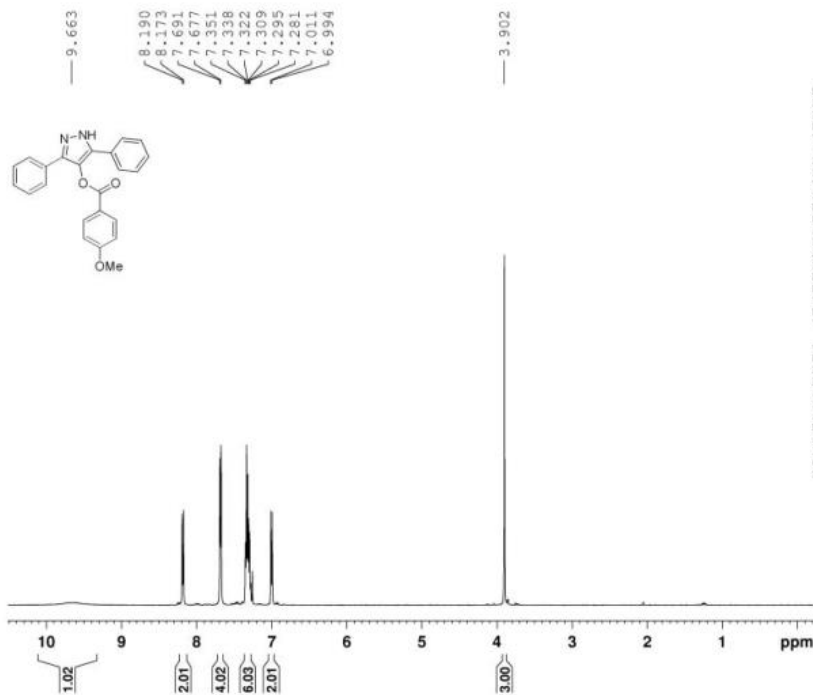

DZW-5-144  
PROTON CDCl3

```

NAME      XB20131219
EXPNO     10
PROCNO    1
Date_     20131219
Time      15.19
INSTRUM   spect
PROBHD    5 mm PATKO 19F
PULPROG   zgpg30
TD        65336
SOLVENT   CDCl3
NS        16
DS        2
SWH       10330.578 Hz
FIDRES    0.157632 Hz
AQ        3.1720407 sec
RG        256
DW        48.400 usec
DE        6.00 usec
TE        296.6 K
D1        1.00000000 sec
TD0       1
  
```

```

----- CHANNEL f1 -----
NUC1      1H
P1        14.14 usec
PL1       1.00 dB
SFO1      500.1330885 MHz
SI        32768
SF        500.1300127 MHz
WDW       no
SSB       0
LB        0.00 Hz
GB        0
PC        1.00
  
```

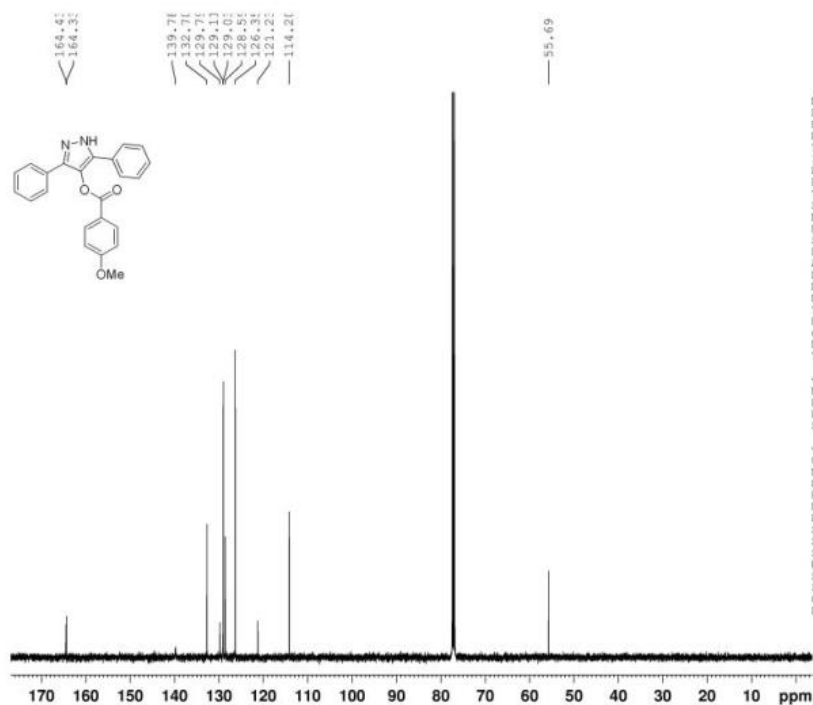

DZW-5-144  
C13CPD CDCl3

```

NAME      XB20131219
EXPNO     11
PROCNO    1
Date_     20131219
Time      15.41
INSTRUM   spect
PROBHD    5 mm PATKO 19F
PULPROG   zgpg30
TD        65336
SOLVENT   CDCl3
NS        512
DS        4
SWH       30030.029 Hz
FIDRES    0.458222 Hz
AQ        1.0912410 sec
RG        128
DW        16.650 usec
DE        6.00 usec
TE        298.1 K
D1        2.00000000 sec
d11       0.03000000 sec
DELTA     1.89999998 sec
TD0       1
  
```

```

----- CHANNEL f1 -----
NUC1      13C
P1        9.50 usec
PL1       -0.50 dB
SFO1      125.7703643 MHz

----- CHANNEL f2 -----
CPDPRG2   waltz16
NUC2      1H
PCPD2     80.00 usec
PL2       1.00 dB
PL12      16.05 dB
PL13      16.50 dB
SFO2      500.1320005 MHz
SI        32768
SF        125.7577736 MHz
WDW       EM
SSB       0
LB        1.00 Hz
GB        0
PC        1.40
  
```

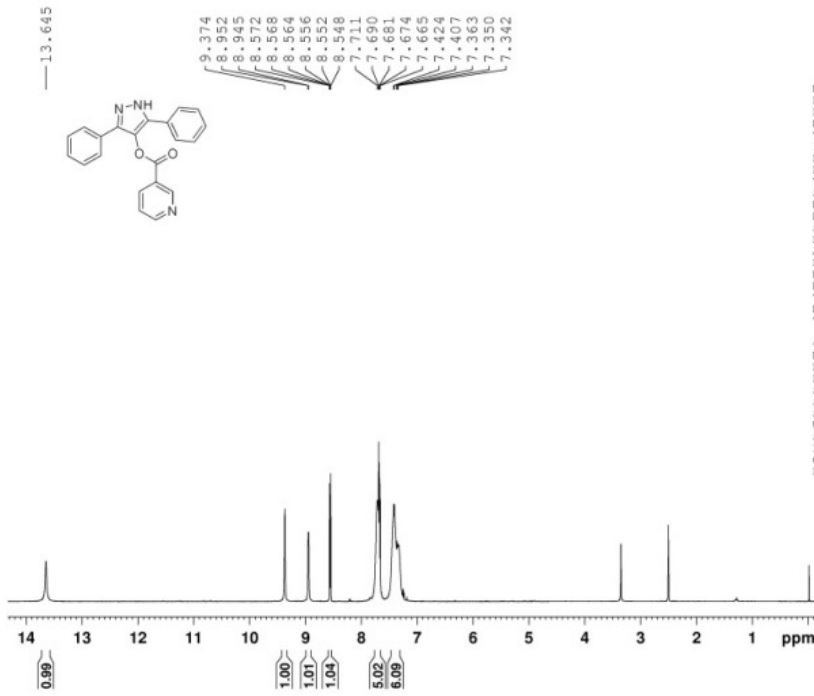

FT-3-83  
PROTON DMSO

```

NAME      XB20140627
EXPNO     38
PROCNO    1
Date_     20140628
Time      5.45
INSTRUM   spect
PROBHD    5 mm PATXO 19F
PULPROG   zg30
TD         65536
SOLVENT   DMSO
NS         16
DS         2
SWH        10330.578 Hz
FIDRES     0.157632 Hz
AQ         3.1720407 sec
RG         128
DW         48.400 usec
DE         6.00 usec
TE         296.9 K
D1         1.0000000 sec
TDO        1
  
```

```

===== CHANNEL f1 =====
NUC1      1H
P1        14.14 usec
PL1       1.00 dB
SFO1      500.130885 MHz
SI        32768
SF        500.1300042 MHz
WDW       no
SSB       0
LB        0.00 Hz
GB        0
PC        1.00
  
```

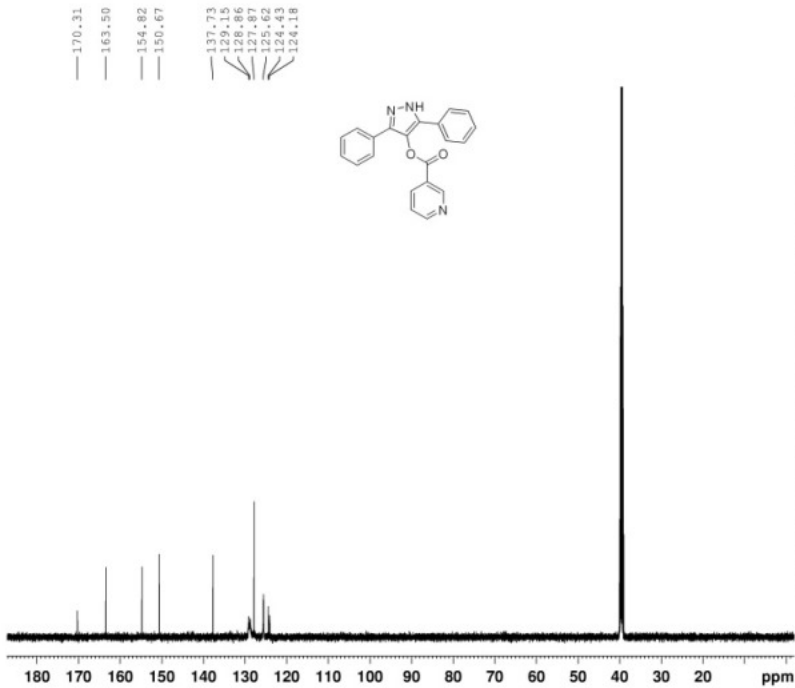

FT-3-83  
C13CPD DMSO

```

NAME      XB20140627
EXPNO     39
PROCNO    1
Date_     20140628
Time      6.41
INSTRUM   spect
PROBHD    5 mm PATXO 19F
PULPROG   zgpg30
TD         65536
SOLVENT   DMSO
NS         1024
DS         4
SWH        30030.029 Hz
FIDRES     0.458222 Hz
AQ         1.0912410 sec
RG         256
DW         16.650 usec
DE         6.00 usec
TE         298.3 K
D1         2.0000000 sec
d11        0.0300000 sec
DELTA      1.89999998 sec
TDO        1
  
```

```

===== CHANNEL f1 =====
NUC1      13C
P1         9.50 usec
PL1        -0.50 dB
SFO1      125.7703643 MHz
  
```

```

===== CHANNEL f2 =====
CPDPRG2   waltz16
NUC2      1H
PCPD2     80.00 usec
PL2       1.00 dB
PL12      16.05 dB
PL13      16.50 dB
SFO2      500.1320005 MHz
SI        32768
SF        125.7578504 MHz
WDW       no
SSB       0
LB        0.00 Hz
GB        0
PC        1.40
  
```

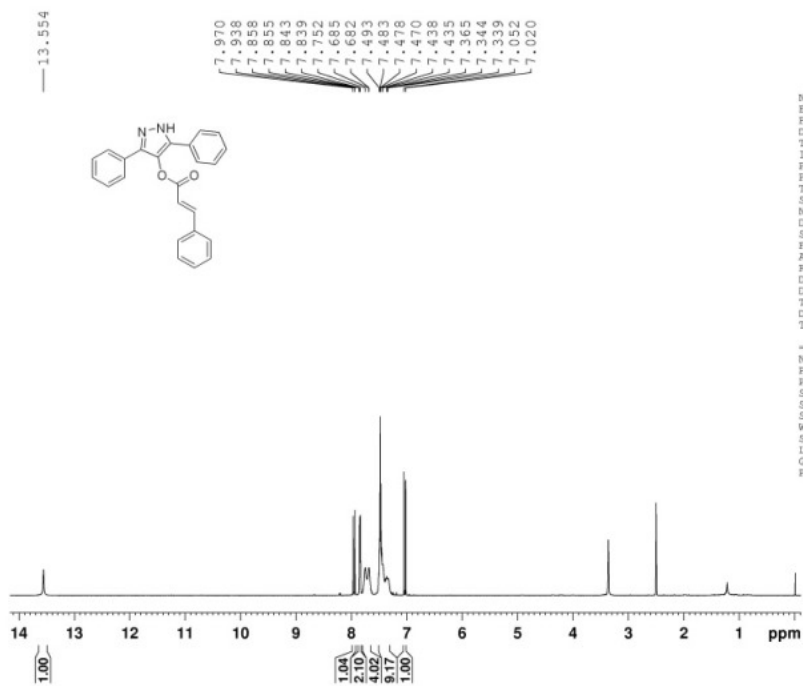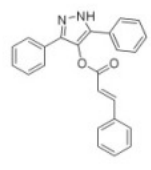

FT-3-82  
PROTON DMSO

```

NAME      XB20140627
EXPNO     36
PROCNO    1
Date_     20140628
Time      4.43
INSTRUM   spect
PROBHD    5 mm PATXO 19F
PULPROG   zg30
TD         65536
RG         161.3
SOLVENT   DMSO
NS         16
DS         2
SWH        10330.578 Hz
FIDRES     0.157632 Hz
AQ         3.1720407 sec
RG         161.3
DW         48.400 usec
DE         6.00 usec
TE         296.9 K
D1         1.0000000 sec
D11        1
TDO        1

----- CHANNEL f1 -----
NUC1      1H
P1        14.14 usec
PL1       1.00 dB
SFO1     500.130885 MHz
SI        32768
SF        500.1300041 MHz
WDW       no
SSB       0
LB        0.00 Hz
GB        0
PC        1.00

```

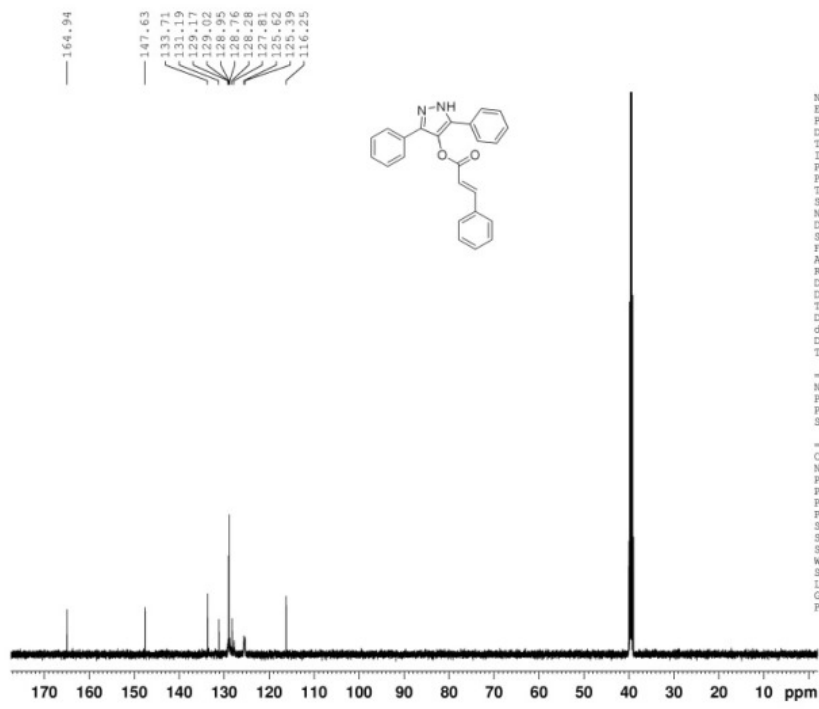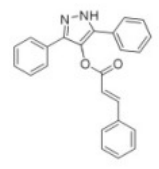

FT-3-82  
C13CPD DMSO

```

NAME      XB20140627
EXPNO     37
PROCNO    1
Date_     20140628
Time      5.39
INSTRUM   spect
PROBHD    5 mm PATXO 19F
PULPROG   zgpg30
TD         65536
RG         161.3
SOLVENT   DMSO
NS         1024
DS         4
SWH        30030.029 Hz
FIDRES     0.458222 Hz
AQ         1.0912410 sec
RG         574.7
DW         16.650 usec
DE         6.00 usec
TE         298.2 K
D1         2.0000000 sec
d11        0.0300000 sec
DELTA     1.89999998 sec
TDO        1

----- CHANNEL f1 -----
NUC1      13C
P1        9.50 usec
PL1       -0.50 dB
SFO1     125.7703643 MHz

----- CHANNEL f2 -----
CPDPRG2   waltz16
NUC2      1H
PCPD2     80.00 usec
PL2       1.00 dB
PL12     16.05 dB
PL13     16.50 dB
SFO2     500.1320005 MHz
SI        32768
SF        125.7578495 MHz
WDW       no
SSB       0
LB        0.00 Hz
GB        0
PC        1.40

```

8.238  
7.736  
7.734  
7.719  
7.400  
7.397  
7.394  
7.383  
7.380  
7.368  
7.367  
7.347  
7.344  
7.342  
7.334  
7.334  
7.330  
7.325  
7.315  
6.842

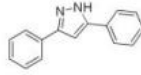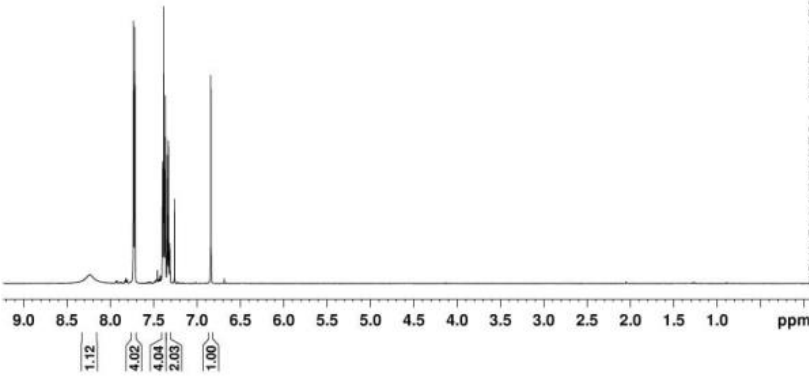

DZW-3-84  
PROTON CDC13

```

NAME      XB20121226
EXPNO     8
PROCNO    1
Date_     20121226
Time      12.52
INSTRUM   spect
PROBHD    5 mm PATCO 19F
PULPROG   zg30
TD         65536
SOLVENT   CDCl3
NS         16
DS         2
SWH        10330.578 Hz
FIDRES     0.157632 Hz
AQ         3.1720407 sec
RG         228.1
DW         48.400 usec
DE         6.00 usec
TE         296.2 K
D1         1.0000000 sec
d11        0.0300000 sec
DELTA      0.89999998 sec
TD0        1

===== CHANNEL f1 =====
NUC1       1H
P1         13.72 usec
PL1        1.00 dB
SF01       500.1330885 MHz

===== CHANNEL f2 =====
CPDPRG2
NUC2       off
PCPD2     100.00 usec
PL2        120.00 dB
PL12       120.00 dB
PL13       120.00 dB
SFO2       500.1330885 MHz
SI         32768
SF         500.1300129 MHz
WDW        no
SSB        0
LB         0.00 Hz
GB         0
PC         1.00
  
```

148.84  
133.23  
128.74  
126.80  
100.19

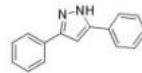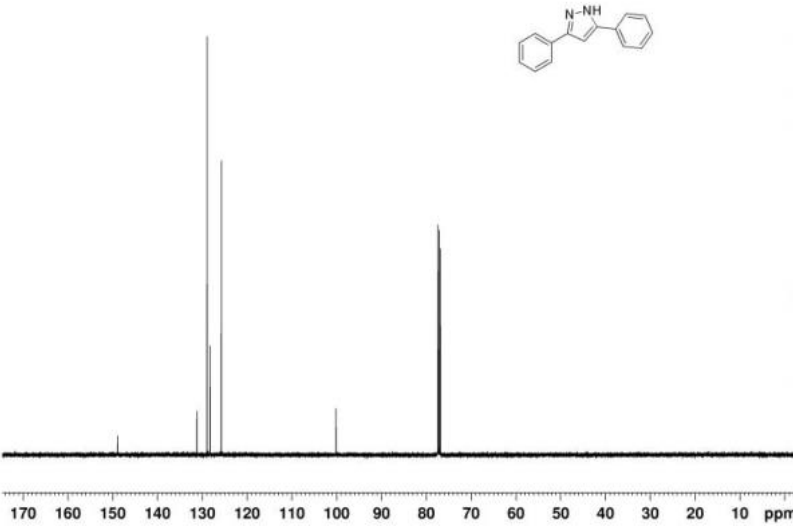

DZW-3-84  
C13CPD CDC13

```

NAME      XB20121227
EXPNO     10
PROCNO    1
Date_     20121227
Time      10.27
INSTRUM   spect
PROBHD    5 mm PATCO 19F
PULPROG   zgpg30
TD         65536
SOLVENT   CDCl3
NS         512
DS         4
SWH        30030.029 Hz
FIDRES     0.458222 Hz
AQ         1.0912410 sec
RG         203.2
DW         16.850 usec
DE         6.00 usec
TE         297.9 K
D1         2.0000000 sec
d11        0.0300000 sec
DELTA      1.89999998 sec
TD0        1

===== CHANNEL f1 =====
NUC1       13C
P1         9.50 usec
PL1        -0.50 dB
SF01       125.7703643 MHz

===== CHANNEL f2 =====
CPDPRG2   waltz16
NUC2       1H
PCPD2     80.00 usec
PL2        1.00 dB
PL12       16.31 dB
PL13       16.50 dB
SFO2       500.1320005 MHz
SI         32768
SF         125.7577745 MHz
WDW        EM
SSB        0
LB         0.10 Hz
GB         0
PC         0.20
  
```



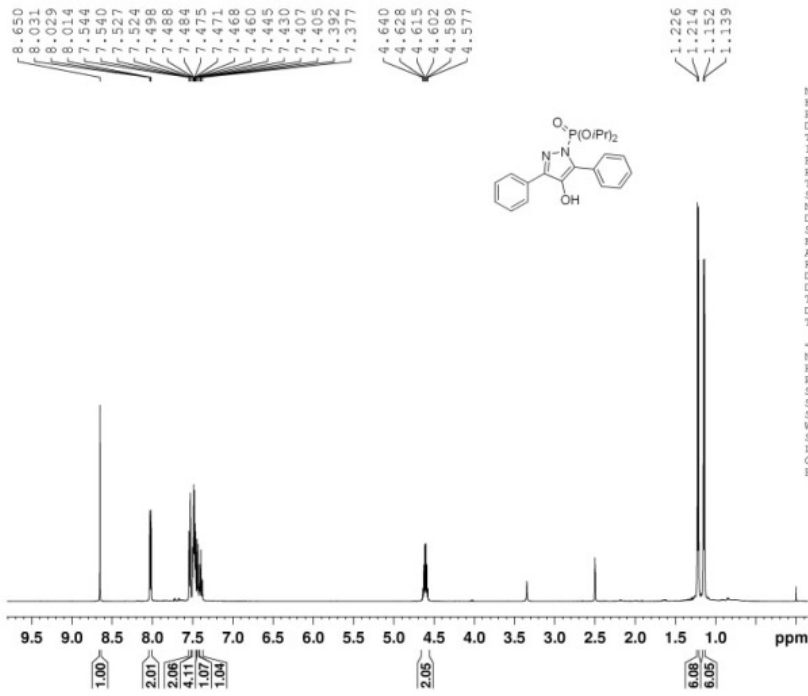

DZW-5-32-2  
PROTON DMSO

NAME XB20130715  
EXPNO 1  
PROCNO 1  
Date\_ 20130715  
Time 14.04  
INSTRUM spect  
PROBHD 5 mm PATXO 19P  
PULPROG zg30  
TD 65536  
SOLVENT DMSO  
NS 8  
DS 2  
SWH 10330.578 Hz  
FIDRES 0.157632 Hz  
AQ 3.1720407 sec  
RG 101.4  
DW 48.400 usec  
DE 6.00 usec  
TE 295.3 K  
D1 1.00000000 sec  
TDO 1

----- CHANNEL f1 -----  
NUC1 1H  
P1 14.14 usec  
PL1 1.00 dB  
SFO1 500.130889 MHz  
SI 32768  
SF 500.1300043 MHz  
WDW no  
SSB 0  
LB 0.00 Hz  
GB 0  
PC 1.00

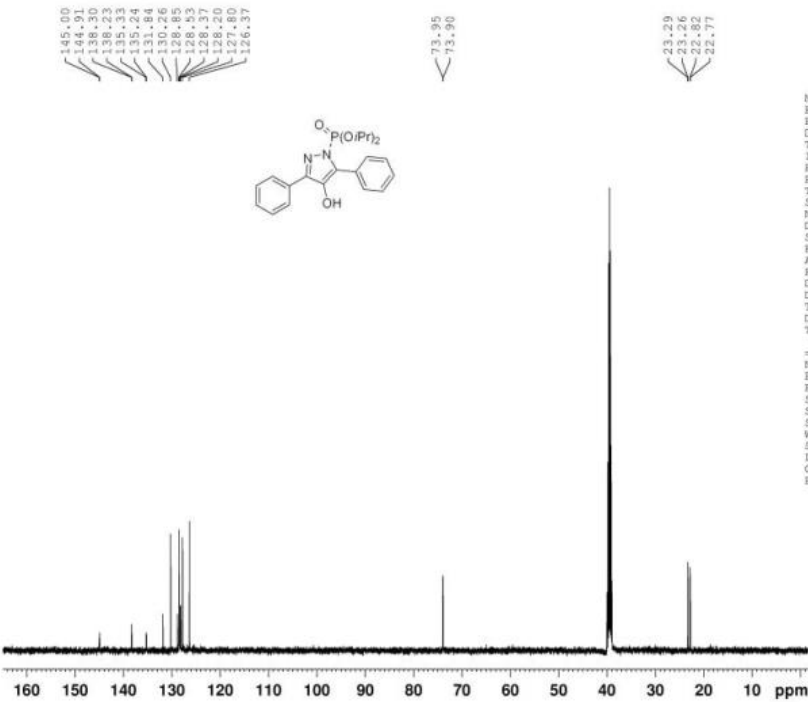

DZW-5-32-2  
C13CPD DMSO

NAME XB20130715  
EXPNO 3  
PROCNO 1  
Date\_ 20130715  
Time 14.15  
INSTRUM spect  
PROBHD 5 mm PATXO 19P  
PULPROG zgpg30  
TD 65536  
SOLVENT DMSO  
NS 128  
DS 4  
SWH 30030.029 Hz  
FIDRES 0.448822 Hz  
AQ 1.0912410 sec  
RG 322.5  
DW 16.650 usec  
DE 6.00 usec  
TE 297.2 K  
D1 2.00000000 sec  
TDO 1

----- CHANNEL f1 -----  
NUC1 13C  
P1 9.50 usec  
PL1 -0.50 dB  
SFO1 125.7703643 MHz  
SI 32768  
SF 125.7578504 MHz  
WDW EM  
SSB 0  
LB 1.00 Hz  
GB 0  
PC 1.40
